# Supplementary material
Source: publisher figshare collection journal article supplement (https://karger.figshare.com/articles/dataset/_/5121181)
Supplement: Supplementary file 1 [file 1]

Archive with 4 entries (4 files):
- 000313854_sm_authors_ ISC.pdf
- 000313854_sm_Figures.pdf
- 000313854_sm_Table_1.xls
- 000313854_sm_Table_2.doc
