# Supplementary material
Source: publisher figshare collection journal article supplement (https://karger.figshare.com/articles/dataset/_/5121181)
Supplement: Supplementary file 1 [file 1 › 000313854_sm_authors_ ISC.pdf]

## Members of the International Schizophrenia Consortium

**Cardiff University** Michael C. O'Donovan<sup>5</sup>, George K. Kirov<sup>5</sup>, Nick J. Craddock<sup>5</sup>, Peter A. Holmans<sup>5</sup>, Nigel M. Williams<sup>5</sup>, Lucy Georgieva<sup>5</sup>, Ivan Nikolov<sup>5</sup>, N. Norton<sup>5</sup>, H. Williams<sup>5</sup>, Draga Toncheva<sup>15</sup>, Vihra Milanova<sup>16</sup>, Michael J. Owen<sup>5</sup>

**Karolinska Institutet/University of North Carolina at Chapel Hill** Christina M. Hultman<sup>9,10</sup>, Paul Lichtenstein<sup>9</sup>, Emma F. Thelander<sup>9</sup>, Patrick Sullivan<sup>13</sup>

**Trinity College Dublin** Derek W. Morris<sup>8</sup>, Colm T. O'Dushlaine<sup>8</sup>, Elaine Kenny<sup>8</sup>, John L. Waddington<sup>17</sup>, Michael Gill<sup>8</sup>, Aiden Corvin<sup>8</sup>

**University College London** Andrew McQuillin<sup>6</sup>, Khalid Choudhury<sup>6</sup>, Susmita Datta<sup>6</sup>, Jonathan Pimm<sup>6</sup>, Srinivasa Thirumalai<sup>18</sup>, Vinay Puri<sup>6</sup>, Robert Krasucki<sup>6</sup>, Jacob Lawrence<sup>6</sup>, Digby Quested<sup>19</sup>, Nicholas Bass<sup>6</sup>, David Curtis<sup>20</sup>, Hugh Gurling<sup>6</sup>

**University of Aberdeen** Caroline Crombie<sup>21</sup>, Gillian Fraser<sup>21</sup>, Noelle Kwan<sup>12</sup>, Nicholas Walker<sup>22</sup>, David St Clair<sup>12</sup>

**University of Edinburgh** Douglas H. R. Blackwood<sup>7</sup>, Walter J. Muir<sup>7</sup>, Kevin McGhee<sup>7</sup>, Ben Pickard<sup>7</sup>, Pat Malloy<sup>7</sup>, Alan W. Maclean<sup>7</sup>, Margaret Van Beck<sup>7</sup>

**Queensland Institute of Medical Research** Peter M. Visscher<sup>14</sup>, Stuart Macgregor<sup>14</sup>, Naomi Wray<sup>14</sup>,

**University of Southern California** Michele T. Pato<sup>11</sup>, Helena Medeiros<sup>11</sup>, Frank Middleton<sup>23</sup>, Celia Carvalho<sup>11</sup>, Christopher Morley<sup>23</sup>, Ayman Fanous<sup>11,24-26</sup>, David Conti<sup>11</sup>, James Knowles<sup>11</sup>, Carlos Paz Ferreira<sup>27</sup>, Antonio Macedo<sup>28</sup>, M. Helena Azevedo<sup>28</sup>, Carlos N. Pato<sup>11</sup>

**Massachusetts General Hospital** Jennifer L. Stone<sup>1-4</sup>, Douglas M. Ruderfer<sup>1-4</sup>, Joshua Korn<sup>3,4</sup>, Steve A. McCarroll<sup>3,4</sup>, Mark Daly<sup>2-4</sup>, Shaun M. Purcell<sup>1-4</sup>, Pamela Sklar<sup>1-4</sup>

**Stanley Center for Psychiatric Research and Broad Institute of MIT and Harvard** Shaun M. Purcell<sup>1-4</sup>, Jennifer L. Stone<sup>1-4</sup>, Kimberly Chambert<sup>2,3</sup>, Douglas M. Ruderfer<sup>1-4</sup>, Joshua Korn<sup>3,4</sup>, Steve A. McCarroll<sup>3,4</sup>, Casey Gates<sup>3</sup>, Stacey B. Gabriel<sup>3</sup>, Scott Mahon<sup>3</sup>, Kristen Ardlie<sup>3</sup>, Mark J. Daly<sup>2-4</sup>, Edward M. Scolnick<sup>2,3</sup>, Pamela Sklar<sup>1-4</sup>

<sup>1</sup>Department of Psychiatry, Massachusetts General Hospital and Harvard Medical School, 185 Cambridge Street, Boston, Massachusetts 02114, USA.

<sup>2</sup>Stanley Center for Psychiatric Research, Broad Institute of MIT and Harvard, Cambridge, Massachusetts 02142, USA.

<sup>3</sup>Broad Institute of Harvard and Massachusetts Institute of Technology, Cambridge, Massachusetts 02142, USA.

<sup>4</sup>Center for Human Genetic Research, Massachusetts General Hospital, 185 Cambridge Street, Boston, Massachusetts 02114, USA.

<sup>5</sup>School of Medicine, Department of Psychological Medicine, Cardiff University, Cardiff C14 4XN, UK.

<sup>6</sup>Molecular Psychiatry Laboratory, Department of Mental Health Sciences, University College London Medical School, Windeyer Institute of Medical Sciences, 46 Cleveland Street, London W1T 4JF, UK.

<sup>7</sup>Division of Psychiatry, School of Molecular and Clinical Medicine, University of Edinburgh, Edinburgh EH10 5HF, UK.

<sup>8</sup>Neuropsychiatric Genetics Research Group, Department of Psychiatry and Institute of Molecular Medicine, Trinity College Dublin, Dublin 2, Ireland.

<sup>9</sup>Department of Medical Epidemiology and Biostatistics, Karolinska Institutet, SE-171 77 Stockholm, Sweden.

<sup>10</sup>Department of Neuroscience, Psychiatry, Ullera°ker, Uppsala University, SE-750 17 Uppsala, Sweden.

<sup>11</sup>Center for Genomic Psychiatry, University of Southern California, Los Angeles, California 90033, USA.

<sup>12</sup>Institute of Medical Sciences, University of Aberdeen, Foresterhill, Aberdeen AB25 2ZD, UK.

<sup>13</sup>Departments of Genetics, Psychiatry, and Epidemiology, University of North Carolina at Chapel Hill, Chapel Hill, North Carolina 27599, USA.

<sup>14</sup>Queensland Institute of Medical Research, 300 Herston Road, Brisbane, Queensland 4006, Australia.

<sup>15</sup>Department of Medical Genetics, University Hospital Maichin Dom, Sofia 1431, Bulgaria.

<sup>16</sup>Department of Psychiatry, First Psychiatric Clinic, Alexander University Hospital, Sofia 1431, Bulgaria.

<sup>17</sup>Molecular and Cellular Therapeutics and RCSI Research Institute, Royal College of Surgeons in Ireland, Dublin 2, Ireland.

<sup>18</sup>West Berkshire NHS Trust, 25 Erleigh Road, Reading RG3 5LR, UK.

<sup>19</sup>West London Mental Health Trust, Hammersmith and Fulham Mental Health Unit and St Bernard's Hospital, London W6 8RF, UK.

<sup>20</sup>Queen Mary College, University of London and East London and City Mental Health Trust, Royal London Hospital, Whitechapel, London E1 1BB, UK.

<sup>21</sup>Department of Mental Health, University of Aberdeen, Aberdeen AB25 2ZD, UK.

<sup>22</sup>Ravenscraig Hospital, Inverkip Road, Greenock PA16 9HA, UK.

<sup>23</sup>State University of New York – Upstate Medical University, Syracuse, New York 13210, USA.

<sup>24</sup>Washington VA Medical Center, Washington, DC 20422, USA.

<sup>25</sup>Department of Psychiatry, Georgetown University School of Medicine, Washington, DC 20057, USA.

<sup>26</sup>Department of Psychiatry, Virginia Commonwealth University, Richmond, VA 23298, USA.

<sup>27</sup>Department of Psychiatry, Sao Miguel, 9500-310 Azores, Portugal.

<sup>28</sup>Department of Psychiatry University of Coimbra, 3004-504 Coimbra, Portugal. {Present address: Department of Psychiatry, University of Oxford, Warneford Hospital, Headington, Oxford OX3 7JX, UK.
