# Supplementary material
Source: publisher figshare collection journal article supplement (https://karger.figshare.com/articles/dataset/_/5121181)
Supplement: Supplementary file 1 [file 1 › 000313854_sm_Table_1.xls]

## Sheet: Supplementary Table1
genename	chromosome	n_markers_in_gene	best_SNP_in_gene	position	best_p-value_full_sample	median_p-value	Fst	p-value_controls	Fst_controls
SDF4	1	3	rs6603781	1148494	0.0208	0.0367	0.00141	0.0162	0.00277
SSU72	1	3	rs7540231	1495898	4.84e-13	0.0242	0.00783	2.94e-06	0.00711
SLC35E2	1	1	rs3817856	1653691	0.219	0.219	0.0007	0.464	0.00082
NADK	1	2	rs1107910	1682181	6.94e-05	0.0131	0.00295	0.0219	0.00259
GNB1	1	7	rs10907187	1748914	0.0114	0.0203	0.00158	0.544	0.0007
LOC100132093	1	1	rs6688000	1813782	0.316	0.316	0.00058	0.204	0.00135
PRKCZ	1	8	rs3128309	2095738	7.54e-07	0.00113	0.00414	0.00217	0.0038
SKI	1	6	rs1496555	2224111	1.86e-07	3.05e-05	0.00453	0.000468	0.00461
LOC100129534	1	1	rs2843130	2273173	8.3e-08	8.3e-08	0.00471	0.000846	0.00427
MORN1	1	11	rs2843129	2275274	2.97e-11	0.000221	0.0067	3.52e-06	0.00695
RER1	1	1	rs3736330	2316935	0.159	0.159	0.0008	0.508	0.00075
PLCH2	1	2	rs7512269	2408485	0.000241	0.458	0.00262	0.0425	0.00224
PANK4	1	3	rs3122922	2446063	6.44e-08	8.28e-06	0.00476	0.000124	0.00521
C1orf93	1	1	rs10910097	2511290	0.41	0.41	0.00048	0.96	0.00014
MMEL1	1	3	rs6684865	2536089	0.00362	0.00545	0.0019	0.0593	0.00206
LOC390988	1	1	rs2377041	2703187	0.287	0.287	0.00061	0.172	0.00145
LOC100129346	1	1	rs6665853	2971701	0.392	0.392	0.0005	0.343	0.00102
PRDM16	1	41	rs6424069	3136890	7.78e-29	1.39e-05	0.01676	4.29e-14	0.01555
MEGF6	1	4	rs10909969	3470009	4.22e-06	0.0137	0.00369	0.000251	0.00488
FAM79A	1	1	rs4276857	3534206	8.95e-05	8.95e-05	0.00288	0.00267	0.00368
TP73	1	3	rs6424090	3618537	0.0116	0.0476	0.00157	0.116	0.00168
CCDC27	1	3	rs2275837	3676178	0.000579	0.296	0.00239	0.0945	0.00179
LRRC47	1	2	rs12563491	3690076	0.00385	0.72	0.00188	0.0355	0.00233
KIAA0562	1	13	rs6663840	3733179	7e-05	0.0203	0.00295	0.00135	0.00403
DFFB	1	1	rs12734459	3782661	0.027	0.027	0.00134	0.581	0.00065
C1orf174	1	1	rs10797353	3802708	3.14e-05	3.14e-05	0.00316	4.16e-05	0.00575
LOC728716	1	3	rs7519458	3906970	0.00264	0.0223	0.00198	0.316	0.00107
AJAP1	1	29	rs17455108	4623908	1.8e-17	0.000129	0.01028	2.42e-11	0.01258
NPHP4	1	26	rs868162	5856823	0.000312	0.0339	0.00256	0.000105	0.0053
KCNAB2	1	7	rs3789541	6063912	6.04e-10	0.00915	0.00594	2.39e-07	0.00824
CHD5	1	2	rs731975	6145088	0.00137	0.525	0.00216	0.00917	0.00305
RNF207	1	1	rs12071731	6198754	4.84e-05	4.84e-05	0.00305	0.0631	0.00202
ICMT	1	1	rs14281	6204254	0.000151	0.000151	0.00279	0.178	0.00144
GPR153	1	2	rs11811690	6239708	0.0652	0.784	0.00107	0.138	0.00157
ACOT7	1	11	rs3789470	6338691	1.78e-07	0.000599	0.00465	0.036	0.00239
HES2	1	1	rs11364	6398273	5.54e-05	5.54e-05	0.00301	0.0257	0.00251
ESPN	1	1	rs10864548	6424383	0.000247	0.000247	0.00262	0.000668	0.00438
PLEKHG5	1	2	rs4908901	6491537	3.35e-05	0.0156	0.00316	0.117	0.00169
NOL9	1	2	rs10746502	6529786	1.09e-05	2.71e-05	0.00343	0.00162	0.00393
ZBTB48	1	1	rs731024	6567310	1.62e-06	1.62e-06	0.00393	0.000487	0.00454
KLHL21	1	2	rs4587589	6579942	0.0262	0.107	0.00134	0.0104	0.00299
DNAJC11	1	9	rs200457	6627943	3.28e-11	0.00441	0.00667	5.53e-06	0.00673
CAMTA1	1	136	rs10779675	7102448	4.83e-14	0.000614	0.00831	4.86e-07	0.0079
LOC727939	1	1	rs845222	7351679	0.332	0.332	0.00056	0.0285	0.00246
VAMP3	1	1	rs707458	7754799	2.06e-05	2.06e-05	0.00327	4.12e-06	0.00687
PER3	1	10	rs10462018	7802214	2.31e-11	1.53e-07	0.00677	0.000206	0.00497
UTS2	1	1	rs228652	7831475	0.000545	0.000545	0.00241	0.0702	0.00196
TNFRSF9	1	4	rs161822	7911726	2.5e-12	9.4e-10	0.00746	3.52e-05	0.00593
PARK7	1	1	rs161801	7965323	3.07e-07	3.07e-07	0.00437	0.000438	0.0046
ERRFI1	1	2	rs397349	7997459	8.74e-13	1.46e-12	0.00764	1.69e-06	0.00735
SLC45A1	1	3	rs9628987	8309317	5.11e-26	0.000608	0.01533	6.02e-14	0.01559
RERE	1	35	rs12136766	8586408	4.88e-57	3.47e-20	0.03335	7.71e-28	0.03087
ENO1	1	1	rs6660137	8855829	0.00042	0.00042	0.00247	0.0337	0.00236
CA6	1	3	rs12738365	8932293	6.56e-09	5.27e-07	0.00534	6.29e-05	0.00555
SLC2A7	1	3	rs769902	9003553	0.00636	0.0124	0.00174	0.087	0.00184
SLC2A5	1	5	rs7521322	9036678	0.0026	0.00293	0.00198	0.406	0.00091
GPR157	1	1	rs1705299	9099904	0.294	0.294	0.0006	0.544	0.0007
LOC727721	1	4	rs744900	9171464	0.00161	0.00468	0.00211	0.00679	0.0032
H6PD	1	2	rs11121354	9250000	0.0611	0.132	0.0011	0.833	0.00033
SPSB1	1	18	rs1294055	9304621	5.5e-11	0.00254	0.00679	1.54e-09	0.01099
SLC25A33	1	2	rs9430155	9560178	0.00204	0.287	0.00205	2.99e-05	0.00591
TMEM201	1	3	rs4073710	9578382	0.000772	0.0653	0.00231	0.0713	0.00195
C1orf200	1	1	rs4240896	9636087	0.0218	0.0218	0.00139	0.0365	0.00232
PIK3CD	1	6	rs11121472	9655808	3.84e-06	0.233	0.00371	9.46e-06	0.00647
CTNNBIP1	1	2	rs935073	9846328	0.0133	0.128	0.00153	0.123	0.00164
UBE4B	1	5	rs6541080	10158626	4.06e-06	7.64e-05	0.00369	0.0723	0.00194
KIF1B	1	21	rs3748578	10343505	0.00915	0.113	0.00164	0.0294	0.00243
APITD1	1	1	rs1307494	10432290	6.75e-07	6.75e-07	0.00416	0.0226	0.00258
PEX14	1	21	rs2480782	10515883	7.11e-07	0.0296	0.00415	0.0504	0.00215
CASZ1	1	13	rs734736	10683097	6.05e-16	0.000121	0.0094	4.31e-07	0.00795
C1orf127	1	1	rs1281008	10933589	1.7e-10	1.7e-10	0.00627	0.000482	0.00455
TARDBP	1	2	rs3765895	10996837	0.00887	0.101	0.00166	0.0597	0.00206
MASP2	1	2	rs6695096	11017626	0.00396	0.0113	0.00189	0.0292	0.00246
EXOSC10	1	3	rs2273336	11073901	0.0155	0.0247	0.00149	0.00176	0.00389
FRAP1	1	23	rs41274510	11104572	0.0197	0.211	0.00142	0.181	0.00141
ANGPTL7	1	1	rs12124598	11178018	0.467	0.467	0.00044	0.00794	0.00316
PTCHD2	1	2	rs2817637	11489777	0.09	0.191	0.00098	0.528	0.00072
MAD2L2	1	1	rs2336030	11659187	0.000127	0.000127	0.00279	0.0296	0.00243
C1orf187	1	3	rs1534989	11684090	0.000608	0.0234	0.00237	0.00373	0.00351
AGTRAP	1	1	rs6540992	11721815	0.14	0.14	0.00086	0.357	0.00101
LOC100131549	1	2	rs6667720	11754202	0.000234	0.00375	0.00263	0.000354	0.0047
C1orf167	1	2	rs11121828	11757041	0.00375	0.00425	0.00188	0.00967	0.00302
MTHFR	1	1	rs17367504	11785365	0.00012	0.00012	0.00288	0.00216	0.00388
CLCN6	1	12	rs2076003	11806734	9.83e-10	0.000406	0.00582	0.000442	0.00459
NPPA	1	2	rs5063	11830235	3.76e-09	0.00104	0.00548	0.000412	0.00462
MFN2	1	3	rs2336384	11968650	2.64e-06	2.97e-05	0.00382	0.000874	0.00426
TNFRSF8	1	5	rs17456501	12111201	2.9e-09	0.0236	0.00563	0.000526	0.00456
TNFRSF1B	1	7	rs1061628	12190586	1.13e-07	0.00017	0.00461	0.0349	0.00234
VPS13D	1	9	rs10864554	12487152	1.17e-06	0.578	0.00401	0.0144	0.00281
DHRS3	1	3	rs4618985	12593911	6.39e-07	7.86e-07	0.00417	0.00269	0.00368
AADACL3	1	8	rs3000929	12710993	0.000928	0.0132	0.00227	0.0324	0.00239
C1orf158	1	2	rs3795746	12741650	0.0558	0.142	0.00112	0.263	0.00119
PRAMEF12	1	1	rs848577	12760427	0.0224	0.0224	0.00138	0.0395	0.00228
LRRC38	1	5	rs3845608	13681814	1.64e-06	0.0132	0.00393	0.00945	0.00304
PDPN	1	6	rs2990672	13791216	3.81e-07	0.045	0.0043	0.00396	0.00349
PRDM2	1	30	rs2744692	13997814	6.7e-08	0.13	0.00474	0.000919	0.00422
LOC100128492	1	1	rs2697971	14021028	0.00538	0.00538	0.00178	0.0174	0.00271
KIAA1026	1	105	rs1000313	15278076	2.41e-21	3.48e-05	0.01249	2.89e-09	0.01034
TMEM51	1	23	rs11808042	15386671	1.75e-06	0.00134	0.00391	2.71e-05	0.00596
FHAD1	1	17	rs2496331	15535971	2.63e-06	0.0179	0.0038	4.95e-06	0.00679
ELA2A	1	2	rs7556116	15669301	6.66e-06	0.000385	0.00356	0.00205	0.00382
ELA2B	1	1	rs6667862	15686773	0.0351	0.0351	0.00126	0.938	0.00018
CASP9	1	11	rs4645995	15721590	0.000184	0.0427	0.00272	0.14	0.00158
DNAJC16	1	5	rs6703016	15733150	0.00469	0.0188	0.00183	0.333	0.00104
AGMAT	1	2	rs6429759	15782590	0.00587	0.00773	0.00177	0.342	0.00102
DDI2	1	5	rs17448778	15857893	0.0239	0.0301	0.00137	0.347	0.00101
PLEKHM2	1	6	rs10927835	15906788	0.000165	0.000384	0.00273	0.276	0.00116
FBLIM1	1	2	rs12091731	15960411	1.21e-08	0.000781	0.00518	3.16e-06	0.007
SPEN	1	6	rs16852052	16074089	4.62e-09	0.00433	0.00547	0.00021	0.00499
ZBTB17	1	4	rs4661346	16155363	1.08e-09	0.00015	0.00579	0.00669	0.00321
C1orf64	1	2	rs1739834	16204570	0.00817	0.00818	0.00167	0.0465	0.00219
HSPB7	1	1	rs1056207	16217414	7.85e-06	7.85e-06	0.00352	0.000122	0.00522
ARHGEF19	1	2	rs221049	16403437	0.000654	0.000788	0.00238	0.00424	0.00348
FBXO42	1	11	rs2994142	16492747	0.000206	0.00121	0.00266	0.00207	0.00381
C1orf144	1	2	rs12131558	16589707	2.1e-06	2.93e-05	0.00386	2.57e-05	0.00598
SPATA21	1	2	rs4661747	16612540	0.0001	0.000115	0.00286	0.0451	0.0022
NECAP2	1	1	rs279779	16649391	1.15e-10	1.15e-10	0.00638	4.72e-07	0.00794
CROCCL2	1	6	rs149562	16667788	2.76e-14	0.000661	0.00845	9.33e-08	0.00869
NBPF1	1	1	rs4316363	16796738	0.00541	0.00541	0.0018	0.472	0.00081
CROCCL1	1	1	rs849703	16841682	0.268	0.268	0.00066	0.549	0.00072
ATP13A2	1	2	rs3738815	17187289	0.000323	0.984	0.00254	0.00217	0.00379
SDHB	1	9	rs11203287	17244984	0.00323	0.012	0.00192	0.0208	0.00262
PADI2	1	21	rs932453	17296137	2.32e-09	0.00278	0.00568	0.00017	0.00514
PADI1	1	8	rs2977235	17429765	5.21e-11	0.00607	0.00656	1.78e-06	0.00728
PADI3	1	11	rs3003426	17460749	7.16e-06	0.11	0.00354	0.000119	0.00524
PADI4	1	11	rs6683201	17553864	9.93e-16	0.116	0.00935	1.53e-10	0.01181
PADI6	1	7	rs4920603	17599966	6.16e-13	0.000104	0.00768	2.46e-06	0.00712
RCC2	1	4	rs6586542	17636153	2.49e-12	1.47e-07	0.00732	2.64e-06	0.00709
ARHGEF10L	1	12	rs17469160	17871507	3.1e-07	0.0517	0.00441	0.000128	0.00528
ACTL8	1	8	rs1599970	17984652	3.31e-10	7.22e-05	0.00609	6.78e-05	0.00551
IGSF21	1	68	rs4920310	18436476	1.63e-22	0.00251	0.01315	2.31e-12	0.01368
KLHDC7A	1	2	rs3007719	18684255	0.0526	0.171	0.00114	0.217	0.00131
PAX7	1	12	rs2298893	18849924	3.43e-10	0.00235	0.00608	2.07e-05	0.00609
TAS1R2	1	1	rs3935570	19039958	0.000385	0.000385	0.0025	0.00644	0.00323
LOC126917	1	4	rs17388046	19138735	5.45e-05	0.000169	0.00301	0.0142	0.00282
UBR4	1	20	rs6663221	19365294	5.98e-06	0.00031	0.00359	0.0123	0.0029
KIAA0090	1	5	rs2275403	19430300	0.00628	0.00804	0.00175	0.0207	0.00263
MRTO4	1	4	rs2294939	19457794	0.000716	0.117	0.00237	0.0391	0.00232
AKR7A2	1	1	rs11808495	19508628	1.49e-05	1.49e-05	0.00339	1.09e-05	0.00647
PQLC2	1	3	rs4912069	19518260	0.000126	0.00455	0.0028	0.000383	0.00467
CAPZB	1	46	rs191942	19564341	5.93e-10	0.000468	0.00594	2.07e-07	0.00831
C1orf151	1	4	rs2294629	19816410	0.000168	0.0495	0.00274	0.301	0.00111
HTR6	1	3	rs6658108	19868078	2.92e-16	2.15e-13	0.00961	8.03e-10	0.01096
TMCO4	1	18	rs16822732	19887887	1.45e-19	0.0195	0.01148	2.05e-12	0.01374
RNF186	1	1	rs3820317	20013168	0.215	0.215	0.0007	0.406	0.00091
OTUD3	1	1	rs2315059	20084379	8.25e-06	8.25e-06	0.00351	0.000786	0.0043
PLA2G2E	1	1	rs877064	20122097	0.00573	0.00573	0.00185	0.116	0.00175
PLA2G2A	1	2	rs3753827	20178474	7.28e-05	0.239	0.00294	0.016	0.00276
PLA2G5	1	6	rs525380	20281961	5.62e-22	7.5e-07	0.01285	1.86e-09	0.01054
PLA2G2D	1	2	rs10916711	20314220	3.8e-05	0.128	0.00311	0.014	0.00283
PLA2G2F	1	1	rs4654839	20340164	1.91e-07	1.91e-07	0.00455	4.03e-06	0.00689
PLA2G2C	1	4	rs7542968	20373178	1.65e-06	0.0001	0.00392	0.000343	0.00471
UBXD3	1	1	rs1061588	20392395	0.000469	0.000469	0.00245	0.00303	0.00362
FLJ32784	1	7	rs10916761	20509961	6.26e-14	0.00161	0.00833	3.87e-09	0.01031
C1orf166	1	1	rs17412284	20702714	1.36e-07	1.36e-07	0.00457	0.000926	0.00422
CDA	1	7	rs577042	20800741	9.45e-05	0.000431	0.00287	0.00174	0.0039
PINK1	1	4	rs1043443	20849967	3.28e-08	0.858	0.00493	4.31e-05	0.00573
DDOST	1	4	rs10799657	20856450	3.88e-05	0.0953	0.00315	0.0188	0.00271
KIF17	1	10	rs535696	20893785	5.9e-09	0.0121	0.00536	3.62e-06	0.00693
SH2D5	1	1	rs637990	20920203	6.69e-07	6.69e-07	0.00416	2.06e-05	0.00609
HP1BP3	1	3	rs1021077	20978603	6.44e-06	0.000757	0.00357	0.000176	0.00504
EIF4G3	1	20	rs10799665	21025227	1.25e-12	2.42e-05	0.0075	1.01e-09	0.01083
ECE1	1	3	rs6426676	21426906	0.0228	0.0558	0.00138	0.015	0.0028
NBPF3	1	2	rs17420195	21666648	5.51e-13	3.72e-09	0.0077	3.51e-06	0.00695
ALPL	1	15	rs10493007	21729835	3.47e-27	8.68e-07	0.01581	2.28e-12	0.01369
RAP1GAP	1	8	rs829406	21822049	6e-20	0.000195	0.01169	2.42e-10	0.0115
USP48	1	10	rs1384673	21940846	1.04e-09	0.0052	0.0058	1.15e-06	0.00748
HSPG2	1	7	rs6680566	22101677	0.000167	0.00859	0.00272	0.0659	0.002
CDC42	1	11	rs2268177	22287997	3.98e-09	0.161	0.00549	0.00227	0.00378
WNT4	1	4	rs3765351	22318578	0.00106	0.175	0.00222	0.122	0.00165
ZBTB40	1	11	rs12754103	22720384	5.54e-08	8.6e-05	0.00479	0.000342	0.00471
EPHA8	1	2	rs209693	22794613	0.0188	0.0663	0.00144	0.218	0.00131
C1QA	1	1	rs2935542	22836058	0.000309	0.000309	0.00256	0.00509	0.00335
C1QB	1	2	rs629409	22859325	0.00345	0.0147	0.00191	0.0132	0.00286
EPHB2	1	24	rs2582036	23001527	2.93e-10	0.00342	0.00627	2.74e-06	0.00724
LOC646262	1	4	rs4655138	23164169	8.88e-06	0.00927	0.00349	0.000384	0.00466
LOC729059	1	2	rs12135629	23211486	0.00486	0.0238	0.00181	0.00952	0.00303
AOF2	1	2	rs10917347	23249128	0.0127	0.0132	0.00155	0.0105	0.00298
LUZP1	1	5	rs16827981	23308125	0.000106	0.138	0.00284	0.000146	0.00514
HNRNPR	1	2	rs3765941	23512136	0.042	0.145	0.00121	0.252	0.00122
ZNF436	1	4	rs12127143	23563260	0.0427	0.289	0.0012	0.232	0.00126
TCEA3	1	7	rs7515139	23621027	5.73e-05	0.2	0.003	0.0025	0.00372
DDEFL1	1	10	rs7523811	23662154	6.82e-05	0.32	0.00296	2.71e-05	0.00596
E2F2	1	2	rs3218203	23710147	0.00886	0.0219	0.00165	0.113	0.00169
TCEB3	1	1	rs2076346	23956236	0.654	0.654	0.0003	0.669	0.00053
C1orf128	1	1	rs4237	23986716	2.51e-10	2.51e-10	0.00616	5.07e-06	0.00677
HMGCL	1	1	rs2256179	24004892	3.23e-09	3.23e-09	0.00552	9.29e-06	0.00648
MYOM3	1	13	rs12404800	24262964	4.75e-20	0.000338	0.01177	5.78e-09	0.01002
IL22RA1	1	3	rs11249201	24324986	0.000529	0.00504	0.00241	0.402	0.00091
IL28RA	1	4	rs3893319	24378636	0.000714	0.437	0.00237	0.407	0.00091
GRHL3	1	4	rs11591176	24548048	0.00846	0.372	0.00166	0.0844	0.00186
C1orf201	1	6	rs34648406	24571765	0.000317	0.171	0.00255	0.0348	0.00234
NPAL3	1	13	rs6687289	24621361	0.000536	0.489	0.00241	0.0266	0.00249
RCAN3	1	2	rs196416	24727780	9.89e-08	6.53e-05	0.00465	0.000258	0.00485
C1orf130	1	9	rs9729036	24790130	1.17e-06	0.000432	0.00401	0.000308	0.00477
CLIC4	1	2	rs6604978	24963033	2.49e-05	2.74e-05	0.00322	0.0454	0.0022
RUNX3	1	7	rs10903115	25134283	6.49e-10	0.000349	0.00592	1.48e-06	0.00737
TMEM57	1	2	rs11802413	25633507	2.32e-05	4.49e-05	0.00324	7.19e-06	0.0066
LDLRAP1	1	1	rs3924486	25765467	0.254	0.254	0.00066	0.249	0.00124
MAN1C1	1	18	rs2982313	25872104	2.44e-19	1.86e-06	0.01134	2.72e-07	0.00817
SEPN1	1	2	rs7549097	26002025	0.00655	0.0237	0.00173	0.51	0.00075
C1orf135	1	4	rs213628	26044137	4.62e-05	7.87e-05	0.00307	0.0032	0.0036
PAFAH2	1	6	rs11247834	26168357	0.0156	0.0475	0.00149	0.11	0.00171
EXTL1	1	1	rs17163470	26223969	1.63e-17	1.63e-17	0.01037	1.28e-10	0.01189
SLC30A2	1	2	rs4659404	26237961	3.5e-05	0.000489	0.00313	0.0025	0.00372
TRIM63	1	2	rs2275949	26257737	6.42e-05	0.000186	0.00297	0.000896	0.00424
PDIK1L	1	2	rs1981135	26320326	6.55e-09	0.000185	0.00543	0.00815	0.00316
CNKSR1	1	1	rs2783631	26377343	0.000871	0.000871	0.00229	0.0721	0.00195
CATSPER4	1	3	rs6660744	26398804	5.59e-05	0.018	0.00301	0.285	0.00114
CCDC21	1	6	rs12757113	26469731	0.0121	0.0198	0.00156	0.205	0.00134
UBXD5	1	4	rs12726972	26512221	0.0184	0.206	0.00145	0.343	0.00102
AIM1L	1	6	rs10902741	26539396	3.99e-06	0.0294	0.00369	0.00382	0.0035
ZNF683	1	3	rs11247937	26571744	0.00388	0.00466	0.00187	0.165	0.00147
LIN28	1	1	rs6697410	26628796	0.119	0.119	0.00089	0.754	0.00043
DHDDS	1	1	rs3127011	26655267	0.925	0.925	0.00011	0.895	0.00025
RPS6KA1	1	2	rs282177	26771712	0.000149	0.000451	0.00275	0.00399	0.00348
ARID1A	1	2	rs4589135	26914301	5.84e-10	0.000886	0.00595	4.79e-06	0.0068
ZDHHC18	1	4	rs17162315	27049018	0.000243	0.0141	0.00262	0.00128	0.00406
LOC646567	1	1	rs4970469	27185403	0.0257	0.0257	0.00135	0.779	0.0004
SLC9A1	1	5	rs11247613	27348372	8.74e-11	1.59e-10	0.00643	0.000409	0.00463
WDTC1	1	1	rs12752623	27501132	0.00636	0.00636	0.00174	0.277	0.00115
WASF2	1	2	rs2474293	27628256	3.01e-05	0.000213	0.00317	0.02	0.00264
AHDC1	1	1	rs17357586	27745588	0.000298	0.000298	0.00258	0.011	0.00297
IFI6	1	1	rs10902662	27870981	0.104	0.104	0.00093	0.393	0.00093
FAM76A	1	3	rs10794504	27957322	1.74e-22	7.4e-13	0.01316	3.19e-07	0.00811
STX12	1	2	rs11247683	27974294	1.92e-18	2.86e-15	0.01101	1.93e-06	0.00734
C1orf38	1	2	rs6564	28085562	6.19e-07	0.0156	0.00418	0.004	0.00348
RPA2	1	6	rs2295367	28096899	5.05e-08	7.15e-07	0.00482	0.00211	0.0038
SMPDL3B	1	3	rs11247730	28143324	4.74e-06	0.00256	0.00366	0.0877	0.00184
LOC100128789	1	1	rs11247730	28143324	4.74e-06	4.74e-06	0.00366	0.0877	0.00184
EYA3	1	8	rs17162928	28216105	4.25e-06	2.79e-05	0.00368	0.00253	0.00371
DNAJC8	1	1	rs4908393	28423035	0.449	0.449	0.00045	0.294	0.00112
ATPIF1	1	1	rs9508	28436866	0.333	0.333	0.00056	0.159	0.00149
SESN2	1	2	rs11247766	28477906	0.59	0.601	0.00034	0.638	0.00057
PHACTR4	1	3	rs11247807	28602151	6.42e-05	6.71e-05	0.00297	0.00541	0.00332
RCC1	1	1	rs2227977	28737022	0.0459	0.0459	0.00118	0.613	0.00061
SNHG3-RCC1	1	1	rs2227977	28737022	0.0459	0.0459	0.00118	0.613	0.00061
TAF12	1	1	rs4316338	28823449	0.00158	0.00158	0.00212	0.0409	0.00226
YTHDF2	1	1	rs7520756	28952753	1.57e-10	1.57e-10	0.00628	0.00867	0.00308
OPRD1	1	6	rs4654322	29023832	5.24e-10	3.07e-08	0.00598	2.73e-06	0.00707
EPB41	1	13	rs2985327	29192067	8.76e-09	8.01e-05	0.00526	0.00167	0.00392
SFRS4	1	1	rs3094740	29380234	0.0212	0.0212	0.00141	0.0049	0.00339
MECR	1	1	rs16838019	29413119	9.41e-05	9.41e-05	0.00288	0.0232	0.00257
PTPRU	1	10	rs1565714	29446950	3.66e-14	0.000111	0.00844	1.31e-08	0.00968
LAPTM5	1	2	rs10914189	30980368	0.0289	0.397	0.00131	0.202	0.00135
SDC3	1	4	rs4949324	31150330	4.24e-14	0.00954	0.00835	5.47e-07	0.00784
PRO0611	1	1	rs947643	31234025	2.89e-10	2.89e-10	0.00613	0.00547	0.00332
PUM1	1	11	rs7537241	31283591	9.51e-14	2.89e-10	0.00816	6.03e-05	0.00559
NKAIN1	1	1	rs4949356	31426575	1.62e-18	1.62e-18	0.0109	2.14e-09	0.0105
WDR57	1	2	rs3753373	31513293	0.0959	0.101	0.00096	0.7	0.0005
ZCCHC17	1	13	rs17495262	31610219	1.59e-08	0.0313	0.00511	0.000391	0.00465
FABP3	1	3	rs951545	31617252	4.54e-13	0.0124	0.0079	1.08e-08	0.00988
LOC149086	1	1	rs1320580	31746460	5.98e-05	5.98e-05	0.00299	7.71e-05	0.00545
HCRTR1	1	1	rs2271933	31865112	0.816	0.816	0.00019	0.678	0.00052
PEF1	1	3	rs4949454	31871628	0.651	0.863	0.0003	0.908	0.00023
COL16A1	1	5	rs10493049	31941466	0.0414	0.133	0.00121	0.231	0.00127
BAI2	1	2	rs12037400	31987765	1.06e-06	1.71e-06	0.00404	0.00848	0.00309
SPOCD1	1	1	rs552124	32038613	0.113	0.113	0.00091	0.224	0.00129
LOC339483	1	1	rs587707	32471814	0.0269	0.0269	0.00133	0.135	0.00159
LCK	1	1	rs695161	32516453	0.0629	0.0629	0.00108	0.727	0.00046
RP1-27O5.1	1	1	rs4970524	32715249	0.227	0.227	0.00068	0.49	0.00077
ZBTB8	1	2	rs704887	32838071	0.000798	0.403	0.00231	0.0253	0.00252
RBBP4	1	1	rs1136258	32915281	5.67e-05	5.67e-05	0.003	0.00443	0.00342
KIAA1522	1	1	rs4951771	33005810	3.18e-09	3.18e-09	0.00552	0.00031	0.00476
YARS	1	2	rs12760548	33053235	0.0344	0.0509	0.00126	0.0479	0.00217
S100PBP	1	1	rs9500	33096723	6.37e-06	6.37e-06	0.00357	0.0123	0.0029
FNDC5	1	1	rs1746661	33107626	2.82e-09	2.82e-09	0.00555	0.0002	0.00498
HPCA	1	1	rs1284373	33128510	1.31e-18	1.31e-18	0.01093	2.43e-09	0.01041
LOC100129200	1	1	rs1284373	33128510	1.31e-18	1.31e-18	0.01093	2.43e-09	0.01041
ADC	1	3	rs804429	33338100	0.173	0.407	0.00078	0.459	0.00082
TRIM62	1	4	rs636561	33418558	0.00312	0.00601	0.00193	0.0672	0.00198
ZNF362	1	1	rs12723104	33532784	0.00208	0.00208	0.00204	0.422	0.00088
PHC2	1	6	rs6678247	33595856	1.1e-09	0.0517	0.00579	0.00066	0.00439
ZSCAN20	1	2	rs9943259	33732649	0.0311	0.0314	0.00129	0.0837	0.00186
CSMD2	1	127	rs11586497	33823829	4.83e-20	0.000487	0.01175	1.99e-07	0.00833
HMGB4	1	1	rs11589979	34100169	0.00108	0.00108	0.00222	0.0827	0.00187
C1orf94	1	13	rs1335855	34420633	4.36e-06	8.44e-05	0.00367	0.000327	0.00474
DLGAP3	1	1	rs6686484	35141347	3.32e-07	3.32e-07	0.00434	0.00837	0.0031
ZMYM6	1	2	rs12401429	35256605	5.34e-10	0.000244	0.00598	4.68e-05	0.0057
SFPQ	1	1	rs11264115	35429251	6.74e-07	6.74e-07	0.00417	3.44e-05	0.00586
ZMYM4	1	1	rs659215	35615616	3.68e-10	3.68e-10	0.00611	1.21e-05	0.00638
KIAA0319L	1	4	rs10399590	35673941	2.3e-05	8.17e-05	0.00324	0.000832	0.00427
NCDN	1	1	rs2074676	35800298	1.3e-09	1.3e-09	0.00575	7.67e-07	0.00768
PSMB2	1	1	rs6668101	35871787	1.31e-10	1.31e-10	0.00634	2.84e-06	0.00706
CLSPN	1	3	rs535638	35989422	9.86e-05	0.000158	0.00286	0.0353	0.00234
EIF2C4	1	1	rs4652895	36089158	3.82e-05	3.82e-05	0.00311	0.0108	0.00296
EIF2C1	1	2	rs581459	36147697	0.0105	0.0142	0.0016	0.092	0.00181
EIF2C3	1	4	rs12041193	36185347	0.00672	0.0149	0.00172	0.0703	0.00196
TEKT2	1	1	rs408986	36324482	0.00173	0.00173	0.00209	0.0497	0.00215
TRAPPC3	1	2	rs4653162	36386291	0.0317	0.583	0.00129	0.735	0.00045
MAP7D1	1	3	rs4653163	36400032	6.85e-07	0.0111	0.00415	0.000158	0.00509
THRAP3	1	4	rs6662146	36484230	1.01e-13	1.5e-11	0.00815	6.96e-06	0.00664
STK40	1	4	rs11263875	36593514	3.25e-15	7.05e-11	0.009	2.64e-07	0.00821
C1orf102	1	5	rs946680	36669764	0.00453	0.00674	0.00184	0.652	0.00056
CSF3R	1	3	rs3917984	36709188	0.217	0.367	0.0007	0.961	0.00014
GRIK3	1	39	rs501832	37194545	1.04e-07	0.0516	0.00464	0.00753	0.00315
LOC728431	1	2	rs2660563	37702832	0.00529	0.00546	0.00179	0.477	0.00079
C1orf149	1	1	rs2294873	37734200	8.64e-05	8.64e-05	0.00294	0.0306	0.00245
SNIP1	1	1	rs2174769	37778946	2.77e-16	2.77e-16	0.0096	6.55e-08	0.00886
DNALI1	1	2	rs4653300	37796641	1.92e-17	0.000623	0.01032	8.7e-08	0.0088
GNL2	1	2	rs10908355	37807873	1.84e-16	6.03e-14	0.0097	9.23e-08	0.00869
RSPO1	1	1	rs11264075	37856528	0.58	0.58	0.00035	0.575	0.00066
C1orf109	1	2	rs684260	37921352	0.0115	0.0843	0.00161	0.475	0.00081
CDCA8	1	4	rs10908369	37935926	0.00414	0.181	0.00186	0.462	0.00082
EPHA10	1	5	rs587026	37983728	5.06e-15	4.76e-12	0.00891	1.07e-05	0.00642
SF3A3	1	3	rs6660034	38216920	1.79e-12	1.1e-11	0.00757	9.74e-08	0.00887
RRAGC	1	1	rs4360495	39094910	1.55e-06	1.55e-06	0.00403	0.00145	0.0041
LOC100131576	1	2	rs4494114	39112269	2.06e-06	3.23e-06	0.00387	2.44e-05	0.00601
RHBDL2	1	12	rs9438979	39127938	4.83e-10	0.000215	0.006	1.01e-05	0.00644
C1orf108	1	1	rs7553434	39230697	1.21e-08	1.21e-08	0.0052	8.5e-05	0.0054
NDUFS5	1	1	rs1555741	39265708	1.92e-06	1.92e-06	0.00389	0.00129	0.00406
MACF1	1	26	rs6679564	39389667	0.000109	0.0163	0.00284	0.00132	0.00404
KIAA0754	1	1	rs653064	39654588	0.00859	0.00859	0.00168	0.0177	0.00272
BMP8A	1	2	rs1180341	39765395	0.0979	0.277	0.00095	0.156	0.0015
PABPC4	1	3	rs4660293	39800767	0.0289	0.0306	0.00131	0.0736	0.00193
HEYL	1	2	rs4660892	39877171	0.00883	0.0224	0.00165	0.237	0.00125
NT5C1A	1	1	rs784595	39907604	2.31e-11	2.31e-11	0.00677	5.63e-08	0.00894
HPCAL4	1	6	rs2248221	39924704	4.83e-09	0.117	0.00541	0.00251	0.00371
PPIE	1	3	rs1046988	39991652	1.79e-09	0.000577	0.00567	0.000871	0.00425
TRIT1	1	5	rs7533329	40118716	6.05e-06	5.4e-05	0.00359	0.018	0.0027
MYCL1	1	1	rs3134614	40135641	0.029	0.029	0.00131	0.0875	0.00184
MFSD2	1	2	rs2047007	40200562	1.37e-07	0.00183	0.00457	0.00406	0.00347
CAP1	1	8	rs3122412	40287864	0.00895	0.0405	0.00164	0.109	0.00171
PPT1	1	5	rs4660383	40331835	0.00143	0.012	0.00219	0.00793	0.00313
ZMPSTE24	1	2	rs7516571	40506245	0.00016	0.151	0.00273	0.318	0.00107
COL9A2	1	4	rs2076696	40544560	2.91e-12	6.25e-06	0.00731	0.000253	0.00488
LOC388621	1	2	rs375007	40572576	6.73e-07	9.68e-07	0.00416	0.0134	0.00285
SMAP2	1	10	rs427371	40655853	1.06e-07	0.0295	0.00463	0.00971	0.00302
ZNF643	1	4	rs10489434	40694649	3.83e-11	0.00214	0.00664	0.000203	0.00497
ZNF642	1	1	rs10789144	40727743	0.33	0.33	0.00056	0.0772	0.00191
C1orf176	1	1	rs4607875	40747847	1.63e-07	1.63e-07	0.00452	0.0011	0.00413
ZNF684	1	7	rs16865682	40778741	5.01e-12	5.02e-07	0.00715	1.14e-06	0.00749
RIMS3	1	8	rs661221	40866417	2.21e-06	5.82e-05	0.00385	0.0372	0.00231
NFYC	1	12	rs657149	40930745	4.13e-09	0.000326	0.0055	1.58e-07	0.0085
KCNQ4	1	10	rs823671	41027707	8.99e-07	0.00478	0.00408	0.000896	0.00423
CTPS	1	1	rs7546898	41219752	0.09	0.09	0.00098	0.611	0.00061
SCMH1	1	26	rs11209531	41343608	5.66e-06	0.36	0.0036	0.000348	0.00471
LOC100131056	1	3	rs10157966	41495163	0.0469	0.0554	0.00117	0.26	0.00119
EDN2	1	1	rs2759257	41722215	0.000455	0.000455	0.00246	0.0491	0.00216
HIVEP3	1	73	rs17373758	42031720	1.39e-17	0.0131	0.01035	7.62e-09	0.00988
FOXJ3	1	14	rs6665972	42446110	5.1e-10	0.231	0.00598	1.51e-05	0.00624
FAM80A	1	5	rs17369630	42632804	2.04e-07	7.63e-05	0.00446	0.000169	0.00506
ZMYND12	1	7	rs3748845	42673669	0.0018	0.0115	0.00208	0.109	0.00171
LOC728621	1	12	rs16829822	42875431	6.56e-05	0.0168	0.00297	0.00164	0.00393
PPIH	1	1	rs3768027	42902456	0.00839	0.00839	0.00166	0.00153	0.00396
YBX1	1	4	rs3895305	42927079	0.0121	0.133	0.00156	0.00277	0.00366
LOC100129924	1	1	rs2760081	43035260	2.09e-05	2.09e-05	0.00327	0.000698	0.00436
CCDC23	1	3	rs323716	43049899	6.35e-05	0.00121	0.00297	0.00175	0.0039
ERMAP	1	4	rs11210726	43071708	0.00368	0.0335	0.00189	0.13	0.00161
SLC2A1	1	7	rs3820546	43170672	0.000114	0.000147	0.00282	0.0735	0.00193
LOC728869	1	9	rs585655	43369601	0.00118	0.0321	0.0022	0.0346	0.00235
LOC440585	1	4	rs16830421	43389233	0.000532	0.589	0.00241	0.0153	0.00278
WDR65	1	8	rs17390635	43414803	1.54e-05	0.000141	0.00335	0.139	0.00157
TIE1	1	2	rs1467809	43547024	0.199	0.492	0.00073	0.115	0.00168
CDC20	1	1	rs11210838	43599777	0.00931	0.00931	0.00163	0.0328	0.00238
KIAA0467	1	2	rs2251804	43689996	0.294	0.473	0.0006	0.123	0.00164
HYI	1	1	rs2251804	43689996	0.294	0.294	0.0006	0.123	0.00164
PTPRF	1	9	rs11210886	43844133	0.000711	0.00298	0.00233	0.0787	0.0019
JMJD2A	1	6	rs10789439	43895778	2.98e-05	0.242	0.00317	0.0278	0.00246
ST3GAL3	1	32	rs6691988	44026989	1.57e-12	0.00136	0.00751	2.84e-07	0.00823
IPO13	1	3	rs1990150	44186714	9.06e-12	6.47e-10	0.007	4.86e-06	0.00679
DPH2	1	1	rs7161	44211561	1.21e-05	1.21e-05	0.00341	0.00692	0.0032
ATP6V0B	1	1	rs12410334	44215108	0.000405	0.000405	0.00248	0.0158	0.00277
KLF17	1	1	rs7513563	44358203	0.000335	0.000335	0.00253	0.116	0.00168
DMAP1	1	2	rs1291169	44453700	0.00024	0.0056	0.00262	0.0727	0.00194
PRNPIP	1	18	rs17414912	44472435	6.7e-07	0.000546	0.00416	0.000916	0.00422
C1orf164	1	32	rs6429541	44738310	2.25e-06	0.000366	0.00384	0.000192	0.005
MGC33556	1	5	rs2983713	44941313	2.15e-12	4.98e-06	0.00736	0.000114	0.00526
KIF2C	1	1	rs6689911	44992539	1.65e-12	1.65e-12	0.00743	1.55e-06	0.00734
PTCH2	1	1	rs16832263	45071637	6.6e-14	6.6e-14	0.00828	1.11e-06	0.00754
EIF2B3	1	18	rs7531019	45138421	1.99e-13	3.58e-08	0.00795	1.6e-06	0.00733
HECTD3	1	1	rs7541207	45246595	7.2e-06	7.2e-06	0.00357	0.00128	0.00408
ZSWIM5	1	8	rs11585488	45389899	6.36e-07	6.12e-06	0.00432	0.0139	0.00294
MUTYH	1	2	rs3219487	45571142	9.31e-08	2.2e-05	0.00466	0.0357	0.00233
TESK2	1	13	rs2153608	45586528	5.66e-08	1.79e-06	0.00479	0.004	0.00348
MMACHC	1	1	rs2275276	45746515	0.0738	0.0738	0.00104	0.62	0.0006
PRDX1	1	2	rs4660306	45751262	0.00402	0.00605	0.00186	0.187	0.0014
NASP	1	4	rs17410308	45850778	0.159	0.513	0.0008	0.27	0.00117
CCDC17	1	2	rs3014245	45859500	0.682	0.748	0.00028	0.503	0.00076
GPBP1L1	1	4	rs5021934	45881891	0.0699	0.447	0.00105	0.722	0.00047
LOC440587	1	1	rs11582058	46018010	0.0802	0.0802	0.00102	0.0598	0.00206
MAST2	1	28	rs946526	46259755	1.36e-05	0.175	0.00338	0.035	0.00234
PIK3R3	1	4	rs1613296	46319439	0.00629	0.122	0.00177	0.207	0.00135
LOC100133124	1	4	rs1613296	46319439	0.00629	0.122	0.00177	0.207	0.00135
C1orf190	1	1	rs7538871	46444584	9.9e-07	9.9e-07	0.00405	2.14e-06	0.00718
RAD54L	1	1	rs17102086	46495526	0.000946	0.000946	0.00231	0.0034	0.00363
UQCRH	1	2	rs4660921	46554189	8.09e-09	0.104	0.00529	1.43e-05	0.00627
NSUN4	1	8	rs12062	46603034	5.74e-12	1.45e-11	0.00712	0.000194	0.00499
FAAH	1	2	rs2145408	46634494	4.45e-05	0.0223	0.00307	0.0102	0.003
LOC644941	1	1	rs1150066	46674133	3.87e-09	3.87e-09	0.00547	0.00099	0.00418
DMBX1	1	2	rs6683116	46748360	8.39e-06	0.00221	0.0035	0.241	0.00124
KNCN	1	1	rs885127	46784731	0.00959	0.00959	0.00162	0.336	0.00103
MKNK1	1	5	rs2181414	46806436	3.09e-06	0.00051	0.00376	3.56e-05	0.00582
ATPAF1	1	4	rs611468	46897066	8.14e-06	4.06e-05	0.00351	0.0128	0.00288
LOC374973	1	1	rs1025806	46911690	0.000261	0.000261	0.0026	0.147	0.00154
LOC100130197	1	4	rs1890473	46922381	6.45e-07	0.000148	0.00423	0.00217	0.00385
KIAA0494	1	10	rs10158678	46949193	2.83e-08	9.15e-07	0.00504	0.00345	0.00359
CYP4B1	1	5	rs4646491	47053471	0.000271	0.00196	0.00259	0.0262	0.0025
CYP4A11	1	2	rs9332982	47178765	6.2e-09	2.61e-07	0.00536	0.000195	0.00501
CYP4X1	1	3	rs9793989	47269325	0.000201	0.000404	0.00267	0.101	0.00176
CYP4Z1	1	6	rs9793202	47306424	0.0597	0.0822	0.0011	0.83	0.00033
TAL1	1	3	rs7534271	47466568	1.6e-26	1.01e-11	0.01543	4.04e-15	0.01664
STIL	1	9	rs6588196	47516077	1.9e-20	9.85e-05	0.01198	1.63e-09	0.0106
CMPK	1	1	rs12123269	47578674	0.000898	0.000898	0.00227	0.114	0.00168
LOC388630	1	51	rs11581081	48066707	3.09e-13	0.000214	0.00785	2.85e-09	0.01034
LOC391037	1	10	rs11205449	48419711	0.000144	0.163	0.00277	0.00899	0.00308
SLC5A9	1	2	rs6670286	48481606	0.044	0.319	0.00119	0.0211	0.00261
SPATA6	1	8	rs1114192	48569919	9.43e-05	0.0415	0.00287	2.15e-05	0.00608
AGBL4	1	73	rs1934379	49014008	5.04e-10	0.0152	0.00602	0.000665	0.00441
C1orf165	1	9	rs1934379	49014008	5.04e-10	0.073	0.00602	0.000665	0.00441
ELAVL4	1	8	rs6588376	50375082	1.48e-10	0.0677	0.00634	0.00021	0.00498
FAF1	1	17	rs17387164	50790057	6.63e-16	0.261	0.00938	5.09e-07	0.00787
CDKN2C	1	1	rs3176466	51210953	0.94	0.94	0.0001	0.195	0.00138
EPS15	1	3	rs11808604	51737293	0.00325	0.00338	0.00192	0.000568	0.00446
NRD1	1	1	rs6702037	52083344	0.015	0.015	0.0015	0.247	0.00123
RAB3B	1	4	rs2795007	52195451	0.0669	0.182	0.00107	0.0941	0.0018
TXNDC12	1	3	rs7512076	52258692	0.347	0.574	0.00054	0.448	0.00084
LOC100128489	1	1	rs17106988	52272527	0.574	0.574	0.00035	0.698	0.0005
ZFYVE9	1	8	rs2753402	52543996	0.0647	0.145	0.00108	0.461	0.00082
ORC1L	1	1	rs6672059	52627635	0.102	0.102	0.00094	0.501	0.00076
ZCCHC11	1	4	rs997915	52745798	2.49e-05	0.121	0.00323	0.00442	0.00343
MGC52498	1	4	rs494030	52875115	0.000936	0.0167	0.00226	0.136	0.00158
C1orf163	1	1	rs448788	52934208	0.828	0.828	0.00018	0.973	0.00012
ZYG11B	1	12	rs6588439	52982030	6.48e-15	1.45e-05	0.00881	1.66e-10	0.01168
ZYG11A	1	6	rs512723	53116468	1.87e-07	0.0872	0.00449	0.000697	0.00437
ECHDC2	1	1	rs1044365	53134516	0.00027	0.00027	0.00259	0.08	0.00189
LOC100133211	1	1	rs6697076	53231950	8.74e-05	8.74e-05	0.00289	0.00285	0.00365
SCP2	1	16	rs6664845	53287085	7.21e-17	8.74e-05	0.00994	3.46e-06	0.00696
PODN	1	6	rs11584649	53303075	4.71e-15	0.00356	0.00889	7.58e-07	0.00769
SLC1A7	1	9	rs1288418	53337174	4.41e-07	0.0364	0.00426	4.83e-06	0.00679
LRP8	1	10	rs2297657	53519183	3.92e-10	2.97e-07	0.00606	0.000112	0.00527
DMRTB1	1	2	rs1288632	53702124	0.00294	0.00416	0.00195	0.00183	0.00387
GLIS1	1	41	rs11206205	53950479	6.63e-06	0.0183	0.00356	5.35e-05	0.00563
TMEM48	1	6	rs1181156	54048813	3.01e-08	0.000126	0.00495	5.41e-05	0.00562
YIPF1	1	8	rs1127931	54090073	3.12e-05	0.0161	0.00316	0.00151	0.00398
DIO1	1	5	rs2294512	54142894	6.04e-10	0.0272	0.00594	0.000446	0.00458
C1orf41	1	2	rs11206252	54169828	0.00218	0.498	0.00203	0.336	0.00103
LRRC42	1	2	rs12092723	54195489	0.00945	0.101	0.00163	0.561	0.00068
LDLRAD1	1	2	rs1537323	54255111	2.62e-07	0.0416	0.0044	4.14e-05	0.00575
TMEM59	1	2	rs7539402	54273075	1.32e-08	0.00139	0.00516	0.000223	0.00493
CDCP2	1	8	rs6696001	54386733	1.48e-11	0.0301	0.00688	1.18e-07	0.00858
LOC606495	1	1	rs7528869	54417901	0.115	0.115	0.0009	0.423	0.00088
MRPL37	1	3	rs1890566	54440866	2.42e-10	0.0504	0.00617	0.000195	0.00499
C1orf191	1	2	rs3766453	54475457	0.336	0.428	0.00055	0.656	0.00055
SSBP3	1	24	rs17392743	54536829	6.4e-19	0.14	0.01119	1.39e-12	0.01403
ACOT11	1	12	rs2133003	54795145	1.21e-17	0.00604	0.01039	3.99e-10	0.01127
FAM151A	1	1	rs2289015	54847650	0.00073	0.00073	0.00234	0.28	0.00115
C1orf175	1	15	rs10888858	54881566	9.51e-16	0.0128	0.00929	1.14e-09	0.01077
TTC4	1	5	rs10489663	54959274	4.84e-06	0.019	0.00365	0.318	0.00107
PARS2	1	3	rs1180955	54998434	0.418	0.459	0.00048	0.908	0.00023
TTC22	1	2	rs1180936	55028171	4.44e-09	0.0443	0.00544	3.53e-06	0.00695
C1orf177	1	5	rs4926659	55067310	1.32e-05	0.000214	0.00339	0.00276	0.00367
DHCR24	1	9	rs608458	55109538	2.74e-07	8.51e-05	0.00439	2.94e-05	0.00592
TMEM61	1	3	rs2495516	55222206	4.57e-07	8.7e-07	0.00426	2.1e-05	0.00609
BSND	1	3	rs6682884	55246913	1.38e-11	7.63e-07	0.0069	3.96e-06	0.00689
PCSK9	1	2	rs2495480	55281943	0.0143	0.0399	0.00151	0.0832	0.00187
USP24	1	16	rs683880	55319483	5.42e-10	2.43e-08	0.00597	9.89e-05	0.00532
PPAP2B	1	18	rs3738570	56750407	3.69e-10	0.0543	0.00606	6.58e-09	0.00994
PRKAA2	1	9	rs1342382	56949976	2.13e-05	0.0281	0.00326	0.0234	0.00255
C1orf168	1	24	rs2040007	56988915	2.72e-29	0.000233	0.017	3.67e-16	0.01775
C8A	1	21	rs17114572	57148638	2.34e-11	5.39e-05	0.00676	8.27e-05	0.00541
C8B	1	7	rs599857	57201177	3.13e-07	0.000272	0.00435	5.55e-05	0.00561
DAB1	1	279	rs1342876	58351200	2.32e-16	0.00347	0.00964	5.32e-13	0.01437
OMA1	1	15	rs11581395	58755375	0.000572	0.00764	0.00239	0.00659	0.00322
MYSM1	1	11	rs12741968	58931650	2.41e-15	1.2e-08	0.00906	1.82e-08	0.00947
LOC100131060	1	21	rs3015327	59102243	5.99e-06	0.00314	0.00359	0.00101	0.00417
LOC645757	1	3	rs11207324	59129840	0.00314	0.032	0.00195	0.0209	0.00264
LOC729467	1	5	rs12145786	59379009	9.38e-12	0.00194	0.00699	2.8e-10	0.01143
FLJ10986	1	52	rs11207506	59936784	3.19e-17	0.00558	0.01013	1.77e-08	0.00947
HOOK1	1	7	rs10489421	60057975	3.35e-13	0.00146	0.0079	5.97e-06	0.00673
CYP2J2	1	8	rs10493270	60161262	3.33e-07	0.0043	0.00435	0.00185	0.00387
C1orf87	1	13	rs10493277	60279332	6.2e-09	0.00949	0.00535	0.000347	0.00471
NFIA	1	66	rs10889215	61441372	1.9e-14	0.0259	0.00856	1.37e-09	0.0107
TM2D1	1	3	rs1151773	61959312	0.0391	0.107	0.00122	0.083	0.00186
INADL	1	48	rs11581307	62283045	1.7e-13	1.22e-05	0.00812	1.87e-07	0.00848
L1TD1	1	5	rs11802658	62446405	1.69e-07	7.24e-07	0.00451	0.00227	0.00376
ANKRD38	1	26	rs2765263	62531957	1.09e-06	0.0243	0.00404	0.00285	0.00365
DOCK7	1	9	rs11207995	62822139	4.88e-10	1.04e-08	0.00605	1.96e-05	0.00617
ATG4C	1	10	rs12122434	63034240	5.05e-06	0.00813	0.00363	0.0347	0.00234
LOC199897	1	2	rs12751992	63246918	0.000107	0.000698	0.00284	0.00686	0.0032
ALG6	1	6	rs10493345	63673489	1.77e-08	0.015	0.00508	1.36e-06	0.00741
ITGB3BP	1	6	rs12078371	63755548	9.05e-10	0.0014	0.00584	2.13e-07	0.00829
EFCAB7	1	4	rs12083433	63790734	1.06e-08	2.61e-05	0.00522	1.23e-06	0.00745
PGM1	1	17	rs2269252	63870653	2.11e-09	0.000397	0.00563	0.0294	0.00244
ROR1	1	65	rs7521581	64324299	8.36e-08	0.00787	0.00469	0.0386	0.00229
UBE2U	1	8	rs41529245	64480256	1.27e-11	3.6e-06	0.00692	8.32e-10	0.01093
CACHD1	1	27	rs11208493	64900983	8.42e-12	0.000221	0.00703	1.62e-05	0.00622
RAVER2	1	7	rs2500234	65008123	0.0038	0.0246	0.00192	0.269	0.00118
JAK1	1	26	rs310241	65075926	4.23e-12	0.00608	0.00719	9.39e-05	0.00536
AK3L1	1	10	rs4916031	65454131	0.000296	0.0374	0.00257	0.000467	0.00457
AK3L2	1	10	rs4916031	65454131	0.000296	0.0374	0.00257	0.000467	0.00457
LOC645195	1	2	rs10889531	65486706	2.3e-05	0.0445	0.00324	0.00725	0.00317
DNAJC6	1	22	rs4655762	65641862	9.14e-06	0.0394	0.00349	0.0208	0.00262
LEPROT	1	1	rs1887285	65670335	0.0238	0.0238	0.00137	0.145	0.00155
LEPR	1	35	rs11208674	65811905	9.78e-18	4.98e-09	0.01058	1.94e-09	0.01064
LOC645227	1	3	rs2228693	66281602	0.091	0.109	0.00097	0.00352	0.00354
PDE4B	1	117	rs544361	66456040	7.64e-13	0.0114	0.00763	6.41e-07	0.00777
SGIP1	1	74	rs1325267	66933402	4.79e-08	0.0168	0.00484	0.000331	0.00473
TCTEX1D1	1	7	rs7530784	67001519	1.23e-16	0.0735	0.00981	7.19e-09	0.00992
INSL5	1	1	rs497710	67037519	0.000808	0.000808	0.0023	0.228	0.00128
WDR78	1	9	rs3008892	67146146	1.69e-11	2.01e-07	0.00685	2.74e-07	0.00818
MIER1	1	10	rs7516251	67225623	1.06e-17	1.82e-08	0.01052	5.42e-09	0.01014
SLC35D1	1	12	rs2755251	67269013	6.06e-11	1.98e-08	0.00652	3.1e-06	0.00701
C1orf141	1	8	rs2144658	67344483	1.97e-06	0.00579	0.00389	0.00405	0.00349
IL23R	1	14	rs790633	67451581	3.53e-14	0.000654	0.00839	5.02e-05	0.00566
IL12RB2	1	13	rs2172962	67627635	4.69e-14	1.29e-09	0.00835	1.77e-05	0.00618
SERBP1	1	3	rs12561767	67660151	3.08e-14	3.42e-07	0.00842	1.06e-05	0.00641
GNG12	1	19	rs2249993	68068692	2.75e-15	3.14e-08	0.00903	9.11e-06	0.00649
LOC729620	1	9	rs10157622	68110081	1.47e-18	1.52e-13	0.0109	3.31e-11	0.01244
LOC100133029	1	19	rs11209180	68188395	5.36e-12	0.000285	0.00713	2.19e-07	0.00828
DIRAS3	1	1	rs11801053	68284759	1.97e-07	1.97e-07	0.00447	6.69e-05	0.00552
GPR177	1	31	rs10789257	68368181	3.91e-11	0.0094	0.00663	3.38e-05	0.00585
LOC100129486	1	1	rs2149823	68440880	0.999	0.999	1e-05	0.783	0.0004
LOC149224	1	2	rs2820477	68481222	7.62e-08	1.15e-07	0.00471	0.00218	0.00379
RPE65	1	7	rs3125895	68674323	7.53e-06	0.0149	0.00353	0.0603	0.00204
DEPDC1	1	5	rs6658851	68731263	6.86e-10	0.0588	0.00592	0.00295	0.00363
LRRC7	1	47	rs12032155	70242177	1.02e-06	0.000409	0.00405	0.00178	0.00389
SFRS11	1	2	rs11581894	70455138	7.13e-05	0.00213	0.00295	0.175	0.00144
CTH	1	4	rs10889869	70650552	9.06e-08	0.002	0.00467	0.00138	0.00402
PTGER3	1	43	rs12135331	71104808	1.55e-08	0.000881	0.00512	0.000127	0.0052
LOC100132618	1	2	rs2744908	71293097	4.83e-06	0.646	0.00365	0.000107	0.00529
NEGR1	1	76	rs2630425	72277610	1.12e-20	0.00037	0.01212	5.88e-10	0.01109
LOC100132353	1	2	rs9326098	72513322	8.78e-06	7.12e-05	0.00349	0.00155	0.00396
LRRC44	1	8	rs4650245	74295062	0.00026	0.0032	0.00261	0.000418	0.00463
FPGT	1	2	rs577367	74440274	0.000128	0.00463	0.00279	0.0202	0.00263
TNNI3K	1	32	rs1527684	74668510	1.09e-16	0.0148	0.00986	6.1e-09	0.00999
C1orf173	1	8	rs12723288	74870373	5.33e-06	0.0147	0.00362	0.000619	0.00442
CRYZ	1	1	rs17552114	74945240	3.29e-06	3.29e-06	0.00375	0.00534	0.00333
LHX8	1	2	rs12138223	75387614	2.23e-08	0.0986	0.00506	3.85e-06	0.00693
SLC44A5	1	50	rs211759	75807944	1.78e-22	3.66e-05	0.01341	2.12e-13	0.01505
ACADM	1	8	rs1250876	75965820	2.3e-18	1.76e-08	0.0108	1.66e-07	0.00841
RABGGTB	1	3	rs1146634	76024599	2.33e-20	3.5e-15	0.01196	9.51e-09	0.0098
SNORD45B	1	1	rs11161620	76027816	9.6e-08	9.6e-08	0.00465	0.0359	0.00233
MSH4	1	13	rs1146644	76037376	1.44e-20	1.7e-07	0.01204	5.9e-09	0.00999
ASB17	1	1	rs12043473	76162374	1.44e-12	1.44e-12	0.00746	5.34e-05	0.00563
LOC729766	1	25	rs12035171	76262676	1.93e-12	0.0164	0.00739	2.41e-06	0.00713
ST6GALNAC3	1	97	rs1251577	76324401	1.61e-24	0.000771	0.0143	5.03e-16	0.01761
LOC729708	1	2	rs3862897	76931938	1.22e-13	5.62e-05	0.00809	3.43e-08	0.00917
LOC100133118	1	9	rs584625	76944105	1.1e-13	0.000184	0.0081	4.71e-06	0.0068
ST6GALNAC5	1	21	rs12734254	77180853	4.55e-10	7.19e-06	0.00604	3.75e-06	0.00695
PIGK	1	10	rs12120921	77454845	2.99e-08	0.000257	0.00497	2.17e-05	0.00609
AK5	1	60	rs11162351	77717320	2.17e-45	0.000266	0.02612	9.64e-25	0.02688
ZZZ3	1	2	rs1389790	77861987	2.45e-21	5.64e-12	0.01248	2.38e-11	0.01259
USP33	1	4	rs6687501	77976107	3.69e-21	1e-09	0.01238	4.16e-11	0.01233
LOC653631	1	1	rs4121165	78049565	0.132	0.132	0.00086	0.214	0.00131
FAM73A	1	2	rs4121165	78049565	0.132	0.172	0.00086	0.214	0.00131
C1orf118	1	1	rs9729667	78121802	4.26e-37	4.26e-37	0.02145	1.45e-20	0.02248
NEXN	1	3	rs17101082	78173795	0.0476	0.397	0.00117	0.168	0.00146
FUBP1	1	2	rs750720	78194373	0.277	0.377	0.00062	0.641	0.00057
GIPC2	1	10	rs11162413	78319686	1.02e-22	8.5e-06	0.01357	5.79e-12	0.01355
PTGFR	1	8	rs3766345	78762863	0.000122	0.024	0.0028	0.0502	0.00214
IFI44L	1	4	rs11577394	78879555	5.49e-05	0.0438	0.00305	0.0418	0.00227
ELTD1	1	13	rs1489387	79197633	1.27e-05	0.0273	0.00342	0.000138	0.00519
LPHN2	1	20	rs438327	82143755	6.04e-08	0.132	0.00486	0.0622	0.00206
TTLL7	1	12	rs7519127	84225643	9.91e-07	0.0641	0.00405	0.00585	0.00328
PRKACB	1	13	rs589373	84421173	2.69e-07	0.000102	0.00444	6.57e-06	0.00674
SAMD13	1	3	rs315525	84586554	0.000918	0.00793	0.00227	0.0901	0.00182
DNASE2B	1	7	rs646681	84638996	1.29e-10	0.0915	0.00633	1.66e-05	0.0062
BXDC5	1	1	rs11163984	84730773	0.46	0.46	0.00044	0.188	0.0014
GNG5	1	2	rs17110519	84741337	1.62e-06	0.000629	0.00393	0.00674	0.00321
CTBS	1	4	rs17111498	84800862	1.97e-22	0.00455	0.01366	1.36e-13	0.01557
SPATA1	1	3	rs17111498	84800862	1.97e-22	1.67e-12	0.01366	1.36e-13	0.01557
SSX2IP	1	8	rs2911562	84898731	0.00143	0.402	0.00215	0.015	0.00279
EDG7	1	5	rs12130014	85070402	5.18e-07	7.46e-05	0.00427	0.000263	0.0049
MCOLN2	1	20	rs1530103	85180197	1e-13	0.00758	0.0083	2.23e-06	0.00728
MCOLN3	1	3	rs7519717	85280701	0.00799	0.00828	0.00171	0.206	0.00137
WDR63	1	15	rs709764	85332852	4.11e-19	0.00124	0.01122	1.89e-06	0.00724
SYDE2	1	5	rs817439	85416092	2.58e-11	9.45e-05	0.00673	0.000526	0.0045
BCL10	1	1	rs3768235	85505962	2.19e-05	2.19e-05	0.00326	0.0608	0.00204
LOC646626	1	1	rs2735592	85516329	0.00976	0.00976	0.00163	0.0245	0.00255
DDAH1	1	25	rs18582	85567407	1.73e-10	3.93e-05	0.00625	1.1e-08	0.0097
C1orf181	1	7	rs821389	85899681	2.63e-05	0.0332	0.00321	0.00168	0.00392
COL24A1	1	58	rs10873744	86322157	3.47e-22	7.2e-05	0.01311	4.69e-08	0.00911
ODF2L	1	4	rs272504	86606241	6.53e-08	2.59e-05	0.00476	0.000802	0.0043
CLCA2	1	10	rs1931363	86671145	5.72e-08	2.73e-05	0.00479	0.00106	0.00415
CLCA1	1	14	rs2734704	86723220	1.55e-08	0.000504	0.00512	0.000988	0.00418
CLCA4	1	8	rs974843	86787767	5.5e-09	0.00701	0.00538	2.27e-07	0.00826
CLCA3	1	1	rs569399	86890842	1.98e-05	1.98e-05	0.00328	0.0107	0.00297
SH3GLB1	1	2	rs263483	86973317	0.0436	0.0782	0.00122	0.0651	0.00203
2015-09-01	1	6	rs561728	87143954	0.000319	0.000404	0.00255	0.00935	0.00304
HS2ST1	1	14	rs2064888	87178877	0.00102	0.0162	0.00224	0.0204	0.00263
PKN2	1	12	rs9427965	89032679	2.39e-05	0.00491	0.00324	0.00421	0.00347
GTF2B	1	2	rs7533500	89105552	0.00629	0.429	0.00174	0.417	0.00089
CCBL2	1	4	rs17432348	89195913	0.00653	0.102	0.00174	0.0467	0.00219
GBP3	1	3	rs17433780	89247406	0.0476	0.0797	0.00117	0.264	0.00119
GBP1	1	3	rs2296882	89290761	0.093	0.1	0.00097	0.183	0.00141
GBP2	1	1	rs2026043	89348265	0.00839	0.00839	0.00166	0.77	0.00041
GBP7	1	5	rs676913	89410166	0.00742	0.0185	0.00169	0.425	0.00087
GBP4	1	3	rs6667970	89429449	0.00791	0.014	0.00168	0.00312	0.0036
GBP5	1	2	rs535351	89499180	0.0043	0.4	0.00184	0.268	0.00117
GBP6	1	5	rs928652	89621789	0.00078	0.133	0.00231	0.0744	0.00193
LRRC8B	1	3	rs922105	89798245	0.000275	0.00249	0.00259	0.000882	0.00425
LRRC8C	1	10	rs17441836	89908021	0.00482	0.0746	0.00181	0.0289	0.00244
LRRC8D	1	5	rs10754295	90094972	0.0481	0.0956	0.00117	0.281	0.00115
ZNF326	1	1	rs11808927	90243503	2.24e-07	2.24e-07	0.00444	0.000415	0.00462
LOC149351	1	4	rs1890267	91085240	5.59e-10	0.656	0.00596	1.12e-07	0.0086
ZNF644	1	5	rs358683	91230623	1.4e-05	0.0647	0.00338	0.00523	0.00336
HFM1	1	7	rs7417055	91513560	2.04e-05	0.0152	0.00327	0.0014	0.00401
CDC7	1	3	rs13447526	91755762	0.0126	0.204	0.00155	0.255	0.00121
TGFBR3	1	57	rs3754014	91944008	5.85e-13	0.0172	0.00769	0.000335	0.00472
BRDT	1	8	rs766665	92191962	7.61e-05	0.012	0.00293	0.0191	0.00267
ABHD7	1	1	rs6664544	92296781	0.114	0.114	0.0009	0.351	0.001
BTBD8	1	4	rs2093879	92358419	1.77e-08	3.44e-08	0.00508	1.98e-06	0.00723
RPAP2	1	4	rs11588044	92588219	9.39e-12	2.49e-10	0.00701	9.96e-08	0.00869
GFI1	1	1	rs11164607	92719726	0.000888	0.000888	0.0023	0.0177	0.00274
EVI5	1	19	rs6680578	92949466	1.07e-05	0.00898	0.00344	0.00112	0.00414
FAM69A	1	13	rs6604026	93076191	3.94e-08	1.47e-05	0.00488	0.00282	0.00365
RPL5	1	2	rs6604026	93076191	3.94e-08	0.0172	0.00488	0.00282	0.00365
MTF2	1	4	rs12057476	93355332	2.22e-09	0.206	0.0058	2.14e-07	0.00857
TMED5	1	1	rs2783489	93399572	0.651	0.651	0.0003	0.687	0.00052
CCDC18	1	6	rs573056	93461407	5.35e-11	8.12e-07	0.00656	5.83e-08	0.00892
LOC100130531	1	12	rs6687359	93532515	9.81e-12	1.24e-06	0.00699	4.59e-08	0.00903
DR1	1	2	rs1559828	93598226	4.04e-05	5.58e-05	0.0031	0.000792	0.00431
BCAR3	1	12	rs11580965	93902252	1.46e-20	3.47e-09	0.01205	1.08e-10	0.0119
DNTTIP2	1	2	rs2143992	94109636	7.39e-08	1.06e-06	0.00472	0.019	0.00267
GCLM	1	1	rs12140446	94137147	1.07e-05	1.07e-05	0.00344	0.00731	0.00317
ABCA4	1	38	rs1209169	94326942	3.78e-16	0.0026	0.00953	4.64e-08	0.00903
ARHGAP29	1	7	rs6657063	94431982	0.00218	0.0939	0.00203	0.0244	0.00253
ABCD3	1	2	rs10493872	94663006	0.00156	0.168	0.00213	0.0259	0.0025
F3	1	2	rs1144300	94774799	3.77e-05	0.0709	0.00312	0.0811	0.00189
SLC44A3	1	25	rs859074	95122025	2.37e-08	0.0308	0.00501	6.99e-05	0.0055
CNN3	1	1	rs859058	95140237	0.0182	0.0182	0.00145	0.21	0.00133
LOC729970	1	2	rs2766005	95201002	0.00661	0.315	0.00176	0.000438	0.00461
ALG14	1	7	rs11165284	95226315	4.67e-08	7.07e-06	0.00484	0.0059	0.00328
TMEM56	1	4	rs13375406	95378893	2.92e-05	0.026	0.00318	0.00341	0.00356
RWDD3	1	1	rs3767316	95477641	0.00839	0.00839	0.00166	0.0417	0.00225
LOC729977	1	4	rs11165373	95554220	0.0666	0.423	0.00107	0.206	0.00134
PTBP2	1	7	rs6699242	97031056	0.00568	0.028	0.00177	0.572	0.00066
DPYD	1	61	rs11165887	97747247	1.35e-14	9.2e-05	0.00863	0.000252	0.00486
LOC729987	1	5	rs12743537	98453515	1.93e-09	3.97e-06	0.00565	4.42e-05	0.00572
SNX7	1	13	rs12757095	98983346	0.000328	0.0543	0.00266	0.0789	0.00198
PAP2D	1	26	rs1329461	99169201	8.97e-05	0.00979	0.0029	0.0845	0.00187
LOC100129620	1	27	rs12409665	99302655	7.31e-20	0.0209	0.01165	2.09e-12	0.01374
LPPR4	1	9	rs712894	99511640	6.26e-19	1.65e-05	0.01111	6.8e-11	0.0121
PALMD	1	10	rs834996	99885324	4.7e-20	0.00937	0.01176	1.22e-11	0.01291
FRRS1	1	14	rs12141159	99950114	1.01e-11	0.00353	0.00697	0.000407	0.00463
AGL	1	15	rs2640911	100103853	8.16e-14	0.00877	0.00831	1.7e-06	0.00741
SLC35A3	1	1	rs7518943	100236010	0.598	0.598	0.00034	0.913	0.00022
HIAT1	1	2	rs568451	100283262	0.000602	0.619	0.00238	0.103	0.00175
SASS6	1	3	rs17121872	100340495	0.000996	0.00378	0.00227	0.15	0.00154
CCDC76	1	1	rs12733952	100384159	0.436	0.436	0.00046	0.779	0.0004
LRRC39	1	2	rs6677080	100406057	0.16	0.61	0.0008	0.405	0.00091
DBT	1	6	rs10783127	100485888	0.000793	0.142	0.00231	0.0274	0.00248
RTCD1	1	4	rs7514752	100518544	9.9e-06	0.000235	0.00346	0.00556	0.00331
CDC14A	1	9	rs17122392	100636056	1.21e-07	4.7e-05	0.00476	0.000774	0.00447
LOC100128787	1	2	rs955336	100881570	0.0227	0.461	0.00138	0.232	0.00126
VCAM1	1	3	rs3181088	100971296	0.00182	0.00618	0.00208	0.0401	0.00227
EXTL2	1	2	rs12039319	101112722	8.66e-07	0.0137	0.00409	0.0401	0.00227
SLC30A7	1	4	rs17123521	101159485	1.09e-12	0.00995	0.00753	1.07e-06	0.00752
DPH5	1	3	rs6660290	101256100	9.58e-06	6.23e-05	0.00347	0.313	0.00108
LOC730029	1	6	rs11164296	102008710	1.15e-10	0.000894	0.00636	3.3e-08	0.00918
OLFM3	1	39	rs2184823	102211020	6e-22	2.15e-06	0.01285	5.05e-10	0.01116
COL11A1	1	27	rs1241181	103120453	1.03e-16	0.0149	0.00984	1.24e-10	0.01181
LOC440597	1	1	rs7529144	103839588	0.000696	0.000696	0.00234	0.00112	0.00412
AMY2B	1	1	rs2050592	103904580	4.9e-07	4.9e-07	0.00424	0.000119	0.00524
NTNG1	1	56	rs12029417	107696599	6.61e-12	0.0894	0.00714	1.76e-07	0.00841
VAV3	1	73	rs10494081	108203626	1.89e-19	0.000302	0.01141	2.42e-07	0.00823
SLC25A24	1	9	rs11185282	108483005	1.64e-14	7.25e-06	0.00878	0.000514	0.00458
FAM102B	1	7	rs2225193	108935214	0.00573	0.00993	0.00177	0.241	0.00124
C1orf59	1	1	rs10157512	108996418	0.00319	0.00319	0.00193	0.133	0.0016
FNDC7	1	2	rs2990874	109075821	2.33e-20	0.147	0.01193	1.85e-08	0.00945
STXBP3	1	13	rs2990877	109136885	3.94e-14	2.88e-13	0.00836	2.62e-06	0.00709
C1orf62	1	8	rs1277215	109160817	2.55e-11	0.00649	0.00674	0.000128	0.0052
GPSM2	1	4	rs12030	109274336	3.12e-05	0.0201	0.00316	0.0964	0.00178
CLCC1	1	6	rs839549	109285290	1.76e-08	0.0014	0.00509	6.29e-06	0.00667
WDR47	1	4	rs839879	109329384	1.65e-09	6.71e-05	0.0057	2.29e-05	0.00605
LOC100132742	1	4	rs839879	109329384	1.65e-09	6.71e-05	0.0057	2.29e-05	0.00605
C1orf194	1	1	rs17641109	109451523	0.00721	0.00721	0.00172	0.0474	0.0022
KIAA1324	1	12	rs1298416	109540703	1.38e-10	1.22e-07	0.00631	0.000133	0.00518
SARS	1	2	rs4268379	109579760	0.000121	0.0247	0.0028	0.00522	0.00334
MYBPHL	1	1	rs11583969	109645298	0.00715	0.00715	0.00171	0.693	0.00051
SORT1	1	5	rs17585355	109659338	6.34e-08	0.126	0.00476	0.000617	0.00442
PSMA5	1	3	rs17586966	109757092	3.18e-06	3.04e-05	0.0038	0.00554	0.00335
SYPL2	1	3	rs1525916	109812472	0.0871	0.0905	0.00099	0.367	0.00097
ATXN7L2	1	2	rs1144594	109830998	0.121	0.375	0.00089	0.522	0.00073
GPR61	1	2	rs12044778	109885931	0.00368	0.0772	0.00189	0.194	0.00138
GNAI3	1	1	rs6537830	109908567	0.00778	0.00778	0.00168	0.036	0.00233
GSTM5	1	1	rs12729068	110058147	0.58	0.58	0.00035	0.964	0.00013
GSTM3	1	1	rs3814309	110078926	0.881	0.881	0.00014	0.386	0.00094
EPS8L3	1	3	rs7542853	110106932	0.000706	0.00491	0.00234	0.0207	0.00262
CSF1	1	5	rs3093045	110260462	3.59e-05	0.0106	0.00312	0.00123	0.00408
AHCYL1	1	2	rs11588387	110339387	5.66e-05	0.327	0.003	0.00621	0.00325
FAM40A	1	1	rs12042401	110392339	0.0429	0.0429	0.0012	0.806	0.00037
ALX3	1	3	rs1077580	110408542	0.0155	0.0194	0.00149	0.204	0.00134
SLC6A17	1	10	rs621514	110535317	2.72e-12	2.92e-06	0.00732	2.39e-06	0.00713
KCNC4	1	2	rs2077402	110571816	3.05e-06	0.000188	0.00376	0.0157	0.00277
RBM15	1	1	rs1572263	110687259	0.000243	0.000243	0.00262	0.0167	0.00274
SLC16A4	1	3	rs17025692	110712796	5.01e-05	0.000351	0.00304	0.0234	0.00256
HBXIP	1	1	rs11102099	110751985	0.000271	0.000271	0.0026	0.0256	0.00252
PROK1	1	2	rs7514102	110800377	0.00375	0.079	0.0019	0.457	0.00083
CD53	1	5	rs2885805	111219438	5.29e-14	0.179	0.00829	0.000579	0.00445
TMEM77	1	7	rs325921	111465866	3.08e-06	0.000274	0.00376	0.00313	0.0036
CEPT1	1	5	rs325923	111493036	0.000199	0.00121	0.00267	0.0113	0.00294
DENND2D	1	3	rs2297703	111532681	6.5e-11	4.43e-06	0.0065	2.77e-06	0.00706
CHI3L2	1	5	rs3934922	111586917	1.39e-08	0.0119	0.00515	0.00948	0.00303
CHIA	1	14	rs2786151	111658610	0.0366	0.404	0.00125	0.348	0.00101
C1orf88	1	4	rs15396	111692693	7.4e-07	0.945	0.00415	0.00418	0.00346
OVGP1	1	7	rs3767605	111768723	4.7e-09	0.00168	0.00542	0.000752	0.00432
WDR77	1	2	rs17528989	111792259	1.99e-08	2.51e-08	0.00505	0.000888	0.00424
C1orf162	1	1	rs6692745	111820682	9.66e-08	9.66e-08	0.00466	7.66e-05	0.00546
ADORA3	1	17	rs17027867	111853828	1.91e-09	7.48e-05	0.00565	0.000347	0.00471
RAP1A	1	11	rs7536042	112047110	2.44e-05	0.000334	0.00323	0.00552	0.00331
C1orf183	1	6	rs2076589	112094070	0.000108	0.00981	0.00283	0.00114	0.00411
KCND3	1	46	rs9429610	112279889	1.24e-11	0.00478	0.00692	0.00013	0.00519
CTTNBP2NL	1	7	rs1759687	112753342	7.43e-05	0.156	0.00293	0.0927	0.0018
WNT2B	1	6	rs1759694	112829312	1.89e-07	0.000226	0.00448	0.0281	0.00246
ST7L	1	6	rs6681371	112902691	9.93e-05	0.0014	0.00286	0.00856	0.00309
CAPZA1	1	2	rs2932534	113002320	0.000292	0.000316	0.00257	0.0207	0.00262
MOV10	1	2	rs4839257	113020911	0.000452	0.00587	0.00246	0.0261	0.00251
RHOC	1	2	rs2999156	113048650	0.000834	0.00149	0.00229	0.11	0.00171
SLC16A1	1	1	rs1049434	113258069	2.43e-13	2.43e-13	0.00797	8.52e-05	0.00545
LRIG2	1	4	rs1728229	113434317	1.94e-09	1.33e-08	0.00565	8.78e-05	0.00539
MAGI3	1	24	rs3747998	113987661	6.91e-08	0.004	0.00488	0.095	0.00183
PHTF1	1	1	rs2273758	114082240	7.01e-10	7.01e-10	0.00592	0.00142	0.00401
RSBN1	1	3	rs6537798	114153229	3.93e-06	2.87e-05	0.0037	0.0308	0.00241
PTPN22	1	4	rs3789609	114199322	9.93e-05	0.0884	0.00286	0.263	0.00119
AP4B1	1	1	rs1217401	114240474	0.843	0.843	0.00017	0.822	0.00035
OLFML3	1	1	rs3789614	114324988	0.00125	0.00125	0.00219	0.0114	0.00295
SYT6	1	17	rs519553	114456745	5.08e-07	0.00141	0.00423	0.00194	0.00384
TRIM33	1	3	rs6537825	114749804	2.72e-08	0.0643	0.00507	7.24e-05	0.00558
BCAS2	1	1	rs8128	114912206	0.0193	0.0193	0.00143	0.00568	0.0033
DENND2C	1	3	rs10858049	114997689	2.66e-07	0.00373	0.0044	0.000132	0.0052
AMPD1	1	4	rs2268697	115029016	4.02e-06	0.0236	0.00369	0.00934	0.00304
NRAS	1	1	rs6671984	115059044	0.558	0.558	0.00036	0.0339	0.00236
CSDE1	1	3	rs6668128	115065512	0.00612	0.0374	0.00175	0.0174	0.00271
SIKE	1	1	rs12143357	115122846	0.168	0.168	0.00078	0.345	0.00101
SYCP1	1	13	rs360614	115201463	5.49e-06	0.0234	0.00361	4.85e-05	0.00567
TSPAN2	1	20	rs6537852	115404021	4.14e-07	0.00533	0.00429	0.0103	0.003
NGFB	1	12	rs10442682	115666072	6.89e-11	0.101	0.00658	4.72e-06	0.00689
VANGL1	1	18	rs11586937	116019186	1.98e-10	0.00301	0.00622	0.00651	0.00323
CASQ2	1	14	rs9428226	116108103	1.44e-07	0.0168	0.00455	0.0137	0.00284
NHLH2	1	1	rs10754377	116181695	0.0343	0.0343	0.00126	0.0057	0.00329
SLC22A15	1	16	rs2488433	116328295	4.97e-09	0.0171	0.00541	0.000169	0.00506
C1orf161	1	4	rs6670668	116478071	0.000409	0.187	0.00249	0.0876	0.00184
ATP1A1	1	2	rs12133039	116732546	1.93e-05	3.67e-05	0.00329	0.00512	0.00335
LOC148766	1	6	rs12067788	116797950	7.86e-07	0.0883	0.00411	0.000316	0.00475
CD58	1	2	rs758518	116883333	4.82e-05	0.0014	0.00305	0.00425	0.00344
IGSF3	1	3	rs1981183	117007859	4.53e-10	2.8e-05	0.00601	7.6e-07	0.00769
PTGFRN	1	23	rs1998922	117277238	1.06e-08	0.00234	0.00523	4.49e-05	0.00573
IGSF2	1	5	rs2764851	117349845	0.0111	0.0319	0.00158	0.149	0.00153
TTF2	1	1	rs2057594	117438016	0.16	0.16	0.0008	0.215	0.00131
TRIM45	1	2	rs1048635	117456381	0.0018	0.367	0.00209	0.429	0.00087
VTCN1	1	14	rs10801935	117523410	2.24e-19	1.55e-06	0.01136	4.21e-15	0.01662
MAN1A2	1	17	rs3767802	117844280	1.98e-12	0.00124	0.00738	2.17e-06	0.00718
FAM46C	1	13	rs1627787	117967496	1.72e-09	5.47e-05	0.00568	3.77e-09	0.01022
GDAP2	1	5	rs10489592	118241518	1.12e-06	0.00146	0.00402	4.65e-05	0.0057
SPAG17	1	19	rs10923477	118384931	7.79e-18	8.07e-05	0.01049	2.69e-09	0.01038
TBX15	1	13	rs10923698	119259757	1.27e-11	2.52e-05	0.00692	2.52e-05	0.006
WARS2	1	5	rs2498500	119474616	1.97e-07	0.0109	0.00447	1.32e-05	0.00631
HAO2	1	4	rs41443445	119734775	1.17e-06	1.53e-05	0.00403	2.94e-05	0.00595
HSD3B2	1	2	rs3765948	119764977	4.27e-13	5.17e-13	0.00777	6.88e-09	0.00993
HSD3B1	1	1	rs6428830	119856298	0.0158	0.0158	0.00149	0.154	0.00152
LOC644213	1	2	rs10754407	119879826	3.03e-06	1.19e-05	0.00383	0.011	0.003
LOC100130667	1	4	rs35922771	119965198	0.000217	0.000478	0.00268	0.0515	0.00215
ZNF697	1	5	rs376910	119982800	9.97e-06	0.00034	0.00347	0.0204	0.00263
PHGDH	1	10	rs667770	120060677	1.21e-11	0.00219	0.00693	1.38e-08	0.00959
HMGCS2	1	6	rs3790692	120111391	3.27e-14	0.0028	0.00841	2.69e-06	0.00708
REG4	1	4	rs2793824	120145628	7.65e-08	0.000419	0.00475	0.000502	0.00455
ADAM30	1	1	rs2793823	120239241	0.00791	0.00791	0.00168	0.00482	0.00338
NOTCH2	1	8	rs835575	120258086	0.00011	0.00136	0.00284	0.000491	0.00454
PDE4DIP	1	3	rs4124921	143584684	4.74e-07	1.95e-05	0.00434	0.0267	0.00255
HFE2	1	1	rs10218795	144127413	0.000499	0.000499	0.00243	0.0325	0.00238
LIX1L	1	1	rs833943	144190576	0.000556	0.000556	0.0024	0.0433	0.00223
ITGA10	1	1	rs16827008	144251412	0.000751	0.000751	0.00232	0.00354	0.00355
ANKRD35	1	2	rs12125340	144265807	3.01e-05	5.11e-05	0.00317	1.49e-05	0.00625
NUDT17	1	1	rs2004659	144299541	0.00496	0.00496	0.00181	0.243	0.00123
POLR3C	1	1	rs4970859	144316675	0.00314	0.00314	0.00193	0.147	0.00154
ZNF364	1	6	rs10752829	144345695	3.87e-14	2.23e-09	0.00837	6.4e-06	0.00666
LOC728989	1	9	rs6686200	144970086	5.48e-07	0.0811	0.00422	0.000149	0.00514
PRKAB2	1	3	rs6593739	145102789	0.0009	0.0147	0.00227	0.0806	0.00188
FMO5	1	8	rs6668865	145134659	3.25e-07	0.00779	0.00435	0.00198	0.00384
CHD1L	1	12	rs7555913	145231066	1.66e-09	0.0234	0.00568	1.7e-06	0.0073
BCL9	1	12	rs3820129	145558596	3.19e-12	0.0812	0.0073	0.000433	0.00462
ACP6	1	4	rs11579007	145602908	1.91e-05	0.00137	0.00329	0.0234	0.00256
GJA5	1	7	rs791272	145702219	1.47e-12	0.00186	0.00749	1.39e-06	0.00742
GJA8	1	1	rs17160783	145846565	0.0253	0.0253	0.00135	0.00398	0.00348
SV2A	1	2	rs577935	148152207	0.000223	0.159	0.00264	0.191	0.00138
SF3B4	1	1	rs16836630	148165575	3.02e-08	3.02e-08	0.00496	0.000199	0.00499
OTUD7B	1	3	rs3767628	148205369	5.85e-05	0.151	0.003	0.07	0.00196
VPS45	1	1	rs11205331	148370663	0.175	0.175	0.00077	0.906	0.00023
CA14	1	1	rs3850839	148500906	0.0257	0.0257	0.00134	0.00396	0.00348
MRPS21	1	1	rs7511649	148537415	1.51e-06	1.51e-06	0.00395	0.000517	0.00451
PRPF3	1	1	rs1498308	148561755	0.0225	0.0225	0.00138	0.158	0.0015
KIAA0460	1	8	rs12738490	148669043	6.99e-06	2.22e-05	0.00355	0.00181	0.00388
TARS2	1	1	rs7542068	148730396	6.74e-06	6.74e-06	0.00356	0.00223	0.00378
ECM1	1	1	rs9661040	148749860	0.38	0.38	0.00051	0.458	0.00082
ENSA	1	4	rs7517	148863035	1.59e-16	0.0998	0.00973	3.16e-10	0.01137
GOLPH3L	1	6	rs9733	148885585	2.33e-14	0.495	0.00859	4.41e-06	0.00691
HORMAD1	1	2	rs12063547	148940677	0.489	0.501	0.00042	0.456	0.00082
CTSS	1	3	rs11576175	148994018	6.69e-16	0.225	0.00938	1.32e-09	0.0107
CTSK	1	1	rs12085336	149042404	0.0446	0.0446	0.0012	0.232	0.00128
ARNT	1	3	rs10305710	149069651	0.00357	0.177	0.0019	0.0348	0.00234
SETDB1	1	2	rs11204747	149193776	0.026	0.337	0.00135	0.126	0.00163
LASS2	1	2	rs267736	149212231	4.97e-14	1.35e-11	0.00837	6.16e-08	0.00896
PRUNE	1	2	rs4970934	149261860	0.00216	0.00273	0.00203	0.0518	0.00213
BNIPL	1	2	rs6694158	149280758	0.047	0.155	0.00117	0.362	0.00098
MLLT11	1	1	rs2140709	149303440	0.297	0.297	0.0006	0.604	0.00062
SEMA6C	1	1	rs6674970	149382903	0.0163	0.0163	0.00148	0.0379	0.0023
SELENBP1	1	2	rs2800953	149605194	1.86e-09	0.837	0.00566	0.0244	0.00253
PSMB4	1	1	rs7172	149638762	2.32e-09	2.32e-09	0.0056	6.56e-05	0.00553
POGZ	1	3	rs12751531	149678259	4.28e-07	2.2e-06	0.00427	0.00136	0.00402
CGN	1	4	rs11204838	149760438	0.05	0.0692	0.00115	0.092	0.00181
TUFT1	1	7	rs11204844	149782082	4.98e-10	0.00243	0.00599	1.08e-06	0.00752
SNX27	1	2	rs1196357	149855439	2.39e-20	8.19e-16	0.01192	4.42e-07	0.00794
FLJ36032	1	1	rs939592	149953607	0.482	0.482	0.00042	0.217	0.00131
TNRC4	1	1	rs939592	149953607	0.482	0.482	0.00042	0.217	0.00131
TDRKH	1	3	rs868868	150028732	6.63e-08	0.0948	0.00475	0.0109	0.00296
RORC	1	1	rs3828057	150046801	5.02e-06	5.02e-06	0.00363	0.276	0.00116
LOC100132111	1	2	rs11204897	150075690	0.000285	0.066	0.00258	0.0437	0.00222
THEM5	1	1	rs998501	150092196	2.12e-09	2.12e-09	0.00563	0.000679	0.00438
THEM4	1	7	rs1003107	150128920	7.47e-07	9.98e-07	0.00417	0.00564	0.00333
S100A10	1	1	rs12083193	150229313	0.034	0.034	0.00127	0.348	0.00101
LOC100128468	1	12	rs4845743	150450773	1.63e-13	0.00204	0.00802	4.98e-07	0.0079
FLG2	1	2	rs2282302	150595993	2.7e-06	0.0374	0.0038	0.000167	0.00507
CRCT1	1	1	rs2297760	150753658	0.0418	0.0418	0.00125	0.0118	0.00304
KPRP	1	1	rs2297487	151001014	0.217	0.217	0.0007	0.554	0.00068
LCE1E	1	1	rs1034109	151026302	0.159	0.159	0.0008	0.122	0.00165
LCE1C	1	3	rs877656	151045441	8.21e-05	0.000121	0.00291	0.0238	0.00255
IVL	1	1	rs7528862	151148313	1.7e-05	1.7e-05	0.00332	0.0012	0.00409
PGLYRP3	1	2	rs2771112	151544284	6.75e-18	4.49e-16	0.01063	1.33e-09	0.01078
PGLYRP4	1	10	rs11205273	151582724	4.65e-08	0.108	0.00484	1.56e-05	0.00623
C1orf77	1	1	rs10797056	151880407	0.0282	0.0282	0.00132	0.00387	0.0035
SNAPIN	1	1	rs7345	151900682	0.0585	0.0585	0.00111	0.0073	0.00317
NPR1	1	1	rs3891075	151924811	1.64e-08	1.64e-08	0.0051	1.77e-05	0.00617
INTS3	1	3	rs4073768	151994256	2.72e-10	0.0147	0.00614	4.88e-07	0.0079
GATAD2B	1	10	rs11581644	152157612	1.64e-08	1.54e-07	0.0051	1.68e-06	0.0073
CRTC2	1	1	rs10908557	152193676	5.23e-08	5.23e-08	0.00484	2.95e-06	0.00706
SLC39A1	1	1	rs6413529	152198894	0.123	0.123	0.00088	0.0429	0.00223
NUP210L	1	10	rs4521985	152390147	4.25e-15	2.73e-07	0.00892	7.39e-08	0.0088
TPM3	1	1	rs4620534	152417072	4.49e-13	4.49e-13	0.00775	2.03e-11	0.01266
C1orf43	1	2	rs9803857	152458415	8.07e-08	0.04	0.0047	0.000131	0.00519
UBAP2L	1	6	rs1212352	152505907	1.72e-17	0.00216	0.01029	7.55e-11	0.01205
ATP8B2	1	2	rs2297607	152587566	3.09e-18	7.14e-05	0.01072	7.09e-09	0.00991
IL6R	1	6	rs4240872	152702819	2.16e-09	0.0707	0.00562	5.85e-06	0.0067
SHE	1	1	rs6700296	152740284	3.42e-07	3.42e-07	0.00433	0.000843	0.00426
TDRD10	1	5	rs12136771	152778126	1.72e-06	0.502	0.00391	0.00217	0.00379
UBE2Q1	1	2	rs12144146	152791597	4.32e-08	0.355	0.00486	5.05e-06	0.00677
ADAR	1	9	rs2335230	152856252	1.99e-07	0.000463	0.00446	0.0221	0.00259
KCNN3	1	35	rs1218552	153065934	6.78e-13	0.00059	0.00777	5.28e-09	0.0102
DCST1	1	1	rs4845406	153275234	0.00334	0.00334	0.00192	0.00056	0.00449
GBA	1	1	rs11264345	153479748	0.227	0.227	0.00069	0.0952	0.00179
HCN3	1	1	rs7520184	153520207	8.25e-07	8.25e-07	0.0041	6.55e-05	0.00553
FDPS	1	1	rs11264359	153549453	2.59e-06	2.59e-06	0.00381	0.000204	0.00497
ASH1L	1	4	rs5005770	153611667	2.6e-08	3.81e-06	0.005	6.95e-05	0.00551
YY1AP1	1	1	rs475550	153918705	2.12e-09	2.12e-09	0.00563	7e-06	0.00663
DAP3	1	1	rs821551	153955204	5.31e-11	5.31e-11	0.00655	7.75e-06	0.00656
GON4L	1	1	rs822490	154089595	2.24e-10	2.24e-10	0.0062	5.41e-06	0.00674
SYT11	1	1	rs822508	154117182	3.92e-09	3.92e-09	0.00548	1.75e-05	0.00619
RIT1	1	1	rs1749409	154137040	6.35e-06	6.35e-06	0.00359	0.0839	0.00186
KIAA0907	1	1	rs605025	154154396	0.000462	0.000462	0.00245	0.302	0.0011
SSR2	1	2	rs1804478	154245657	0.00217	0.135	0.00203	0.0565	0.00208
MAPBPIP	1	2	rs7541	154291720	0.000319	0.0136	0.0026	0.000617	0.00451
LMNA	1	1	rs2485668	154368173	5.46e-20	5.46e-20	0.01174	1.5e-05	0.00626
SEMA4A	1	1	rs10908489	154394961	0.632	0.632	0.00031	0.723	0.00047
SLC25A44	1	4	rs2241110	154439111	0.111	0.556	0.00091	0.508	0.00075
PMF1	1	2	rs1052067	154472745	0.00709	0.0463	0.00171	0.0626	0.00202
PAQR6	1	1	rs759330	154479881	1.01e-09	1.01e-09	0.00581	3.78e-05	0.0058
SMG5	1	5	rs2248273	154514531	1.34e-12	2.24e-09	0.00749	4.78e-06	0.00682
CCT3	1	3	rs3795730	154557650	0.0819	0.107	0.001	0.394	0.00093
C1orf182	1	1	rs2274226	154581251	0.328	0.328	0.00056	0.461	0.00082
RHBG	1	3	rs2985714	154607242	3.45e-08	0.0764	0.00491	0.0214	0.0026
C1orf61	1	2	rs11806983	154661105	3.97e-07	3.53e-06	0.0043	0.00162	0.00395
MEF2D	1	2	rs3790458	154726323	3.96e-07	8.84e-06	0.00433	0.00851	0.0031
IQGAP3	1	6	rs1609666	154769615	1.79e-13	4.63e-07	0.00798	3.6e-05	0.00582
APOA1BP	1	2	rs942960	154829554	0.000622	0.00068	0.00237	0.00312	0.00361
GPATCH4	1	4	rs879461	154834120	1.88e-14	0.000899	0.00873	8.26e-07	0.00779
BCAN	1	2	rs2365716	154881818	0.0132	0.122	0.00154	0.157	0.0015
NES	1	1	rs1046650	154905624	4.85e-06	4.85e-06	0.00365	4.78e-05	0.00568
ISG20L2	1	1	rs3795737	154963680	0.554	0.554	0.00037	0.876	0.00027
PRCC	1	2	rs16837644	155004895	0.000387	0.0624	0.0025	0.457	0.00082
SH2D2A	1	1	rs2150906	155051980	0.512	0.512	0.0004	0.964	0.00013
INSRR	1	1	rs10908521	155080274	0.619	0.619	0.00032	0.873	0.00028
NTRK1	1	3	rs2644604	155114730	7.23e-10	0.619	0.00601	1.24e-06	0.0076
PEAR1	1	2	rs11264579	155140087	2.85e-11	0.000374	0.00672	7.35e-05	0.00547
C1orf92	1	1	rs822430	155168883	0.00659	0.00659	0.00173	0.00905	0.00306
ARHGEF11	1	14	rs16837847	155195647	1.36e-12	0.0173	0.00749	2.49e-07	0.00822
ETV3L	1	4	rs10796969	155333371	4.83e-06	0.235	0.00365	0.000566	0.00446
ETV3	1	2	rs6704373	155371094	0.00173	0.00512	0.00217	0.0121	0.00302
FCRL5	1	10	rs6427383	155757797	7.18e-15	2.6e-10	0.00879	3.9e-09	0.01019
FCRL4	1	3	rs2779158	155815794	3.9e-13	1.08e-12	0.0079	2.59e-07	0.00832
FCRL3	1	1	rs17676026	155932960	5.57e-09	5.57e-09	0.00538	0.000115	0.00526
FCRL2	1	2	rs12408952	155996652	0.0528	0.251	0.00114	0.171	0.00145
FCRL1	1	8	rs12132140	156033986	3.65e-06	0.159	0.00373	0.00126	0.00408
LOC649203	1	1	rs6661048	156098021	0.0498	0.0498	0.00116	0.0287	0.00245
KIRREL	1	26	rs3768539	156327197	2.87e-16	1.73e-05	0.0098	9.06e-09	0.00998
CD1D	1	2	rs859013	156417842	0.00522	0.0203	0.0018	0.15	0.00153
CD1E	1	1	rs1065457	156591049	1.44e-05	1.44e-05	0.00336	0.112	0.0017
OR10T2	1	1	rs41488350	156635688	7.98e-07	7.98e-07	0.00411	0.0306	0.00241
OR10R2	1	3	rs3820678	156716862	0.00075	0.0583	0.00232	0.000656	0.0044
OR6Y1	1	1	rs16840314	156783977	0.438	0.438	0.00046	0.615	0.0006
SPTA1	1	11	rs41523545	156863920	4.95e-15	0.131	0.00891	3.37e-06	0.00698
OR6N1	1	1	rs1864346	157003069	1.66e-12	1.66e-12	0.00743	4.44e-08	0.00904
OR6N2	1	1	rs16841094	157013471	2.8e-11	2.8e-11	0.00671	2.42e-06	0.00713
MNDA	1	1	rs11805139	157083362	3.82e-06	3.82e-06	0.00371	0.0105	0.00298
PYHIN1	1	5	rs11590737	157210445	6.39e-16	0.424	0.00949	7.05e-10	0.01114
IFI16	1	6	rs12727764	157249101	1.49e-12	0.000106	0.00745	4.99e-07	0.00789
CADM3	1	5	rs16841832	157420936	0.00502	0.0331	0.00181	0.0285	0.00245
LOC100131825	1	1	rs862996	157435233	0.0577	0.0577	0.00111	0.449	0.00084
FCER1A	1	4	rs12135788	157531167	0.00197	0.00448	0.00206	0.0933	0.0018
APCS	1	1	rs2808661	157824882	0.00661	0.00661	0.00173	0.0161	0.00276
FCRL6	1	1	rs6657365	158049173	1.74e-05	1.74e-05	0.00331	0.0345	0.00235
SLAMF8	1	1	rs7418910	158072355	0.00931	0.00931	0.00163	0.0939	0.0018
CCDC19	1	4	rs11265293	158125374	9.22e-20	0.00558	0.01183	1.1e-15	0.01756
TAGLN2	1	1	rs11265297	158157083	6.65e-05	6.65e-05	0.00296	0.0061	0.00326
IGSF9	1	2	rs4313394	158176961	0.00719	0.0493	0.00171	0.0424	0.00224
SLAMF9	1	2	rs2789416	158190252	1.12e-05	2.36e-05	0.00344	0.00294	0.00365
KCNJ10	1	2	rs1186688	158291507	9.82e-09	0.0966	0.00524	0.000163	0.00508
IGSF8	1	2	rs2369406	158331042	1.13e-07	0.0955	0.00461	0.000137	0.00516
ATP1A2	1	2	rs1046995	158379365	2.2e-06	0.000163	0.0039	2.91e-05	0.006
ATP1A4	1	7	rs2180750	158412210	1.35e-05	0.206	0.00342	0.000632	0.00444
CASQ1	1	2	rs617698	158429496	8.14e-08	0.217	0.0047	0.000623	0.00442
WDR42A	1	3	rs16831647	158463576	0.000136	0.000373	0.00278	0.00405	0.00347
PEX19	1	1	rs2795067	158518416	0.000196	0.000196	0.00268	0.00471	0.0034
COPA	1	3	rs6699059	158544935	1.23e-09	0.000259	0.00576	4.94e-05	0.00567
NCSTN	1	3	rs16831846	158585608	2.66e-07	5.35e-05	0.0044	0.039	0.00228
VANGL2	1	5	rs16831953	158642639	6.64e-09	0.000612	0.00537	0.000533	0.00452
SLAMF6	1	5	rs6689237	158758894	6.79e-21	4.27e-08	0.01226	6.26e-12	0.01325
CD84	1	7	rs10908787	158814871	1.66e-22	2.06e-08	0.01324	2.02e-14	0.016
SLAMF1	1	13	rs41463446	158880518	5.28e-07	0.000952	0.00422	0.000311	0.00476
CD48	1	4	rs1503849	158947388	9.98e-24	0.15	0.01384	2.69e-15	0.01683
SLAMF7	1	2	rs17313034	158980472	0.00022	0.115	0.00265	0.00294	0.00363
LY9	1	5	rs509749	159060184	0.0129	0.044	0.00154	0.0964	0.00178
CD244	1	2	rs11265498	159094909	0.104	0.609	0.00093	0.798	0.00038
F11R	1	4	rs1062826	159234629	5.81e-08	0.415	0.00478	1.29e-05	0.00632
USF1	1	1	rs1556260	159281070	0.402	0.402	0.00049	0.126	0.00163
ARHGAP30	1	2	rs2774279	159284180	0.000227	0.0433	0.00264	0.0102	0.00299
PVRL4	1	2	rs1467742	159317475	0.000776	0.0424	0.00231	0.0266	0.00249
PFDN2	1	3	rs4347230	159341253	0.0567	0.0714	0.00112	0.121	0.00165
DEDD	1	1	rs17389237	159359385	0.0584	0.0584	0.00111	0.25	0.00122
B4GALT3	1	1	rs3813620	159411629	0.0283	0.0283	0.00132	0.224	0.00129
NDUFS2	1	4	rs3813624	159437601	5.3e-13	1.79e-07	0.00776	3.92e-09	0.01026
FCER1G	1	1	rs3557	159455517	0.426	0.426	0.00047	0.803	0.00037
APOA2	1	1	rs5085	159459135	3.69e-05	3.69e-05	0.00312	0.00144	0.004
NR1I3	1	1	rs4073054	159467111	0.054	0.054	0.00114	0.419	0.00089
PCP4L1	1	3	rs2501875	159506095	2.62e-06	0.00373	0.00381	0.00419	0.00345
LOC100132717	1	1	rs16832813	159553345	0.000282	0.000282	0.00258	0.000316	0.00475
SDHC	1	1	rs16832813	159553345	0.000282	0.000282	0.00258	0.000316	0.00475
C1orf192	1	2	rs16832871	159602382	0.000676	0.0138	0.00235	0.000892	0.00424
FCGR2A	1	1	rs4656308	159745375	1.98e-13	1.98e-13	0.00811	2.78e-07	0.00833
FCRLA	1	4	rs12136407	159945001	4.07e-05	0.00262	0.00311	1.45e-05	0.00628
FCRLB	1	2	rs1891020	159961078	0.000165	0.000745	0.00272	0.0146	0.00281
ATF6	1	32	rs4570397	160170307	6.31e-12	0.00078	0.00712	9.64e-06	0.00648
OLFML2B	1	13	rs4348701	160240034	1.74e-15	0.00342	0.00914	7.4e-09	0.00989
NOS1AP	1	80	rs10800422	160535392	1.91e-26	8.35e-05	0.0154	1.34e-12	0.01395
C1orf111	1	2	rs164182	160611823	0.0356	0.139	0.00125	0.754	0.00043
FLJ13137	1	3	rs3738395	160623094	1.05e-08	3.15e-06	0.00522	9.74e-05	0.00534
SH2D1B	1	2	rs351456	160643940	3.84e-08	0.013	0.00489	0.00231	0.00376
UHMK1	1	2	rs7549675	160747192	0.0368	0.0516	0.00124	0.0412	0.00225
UAP1	1	3	rs16863635	160820763	8.32e-05	0.000214	0.0029	0.00125	0.00407
DDR2	1	29	rs6689396	160943322	5.22e-11	0.0179	0.00656	1.44e-09	0.01066
C1orf110	1	8	rs11588419	161097941	3.05e-10	7.28e-05	0.00611	0.000273	0.00483
RGS5	1	19	rs1056514	161380190	7.01e-08	2.17e-05	0.00473	0.0152	0.00279
NUF2	1	12	rs12735996	161562917	8.08e-14	5.85e-05	0.0082	4.04e-06	0.00689
PBX1	1	50	rs1617366	162926661	2.84e-11	0.000405	0.00671	3.95e-06	0.00689
LMX1A	1	34	rs1891932	163539496	7.2e-13	0.0259	0.00765	3.03e-09	0.01032
RXRG	1	21	rs1952179	163671199	8.25e-12	0.0046	0.00705	1.86e-10	0.01165
LRRC52	1	6	rs169557	163793417	3.1e-10	0.00103	0.00611	0.000974	0.00419
MGST3	1	5	rs959617	163883505	5.39e-16	0.000629	0.00944	1.27e-08	0.00963
ALDH9A1	1	7	rs10918239	163911489	0.00788	0.911	0.00168	0.138	0.00158
TMCO1	1	4	rs6426940	164000107	0.000713	0.853	0.00233	8.9e-05	0.00538
UCK2	1	15	rs12125493	164114113	9.85e-08	0.000871	0.00465	4.92e-07	0.00789
FAM78B	1	19	rs7524575	164312048	5.97e-08	0.00783	0.00477	1.06e-05	0.00641
POGK	1	1	rs3820387	165086908	2.05e-15	2.05e-15	0.0091	1.26e-06	0.00744
TADA1L	1	4	rs2075947	165098028	1.49e-17	2.73e-17	0.01042	6.01e-06	0.00674
C1orf32	1	5	rs11579987	165155988	3.56e-14	7.85e-14	0.00839	9.28e-08	0.00869
MAEL	1	2	rs1119091	165236639	0.0205	0.183	0.00144	0.453	0.00084
GPA33	1	6	rs2312489	165307412	4.16e-09	1.95e-06	0.00546	4.74e-05	0.0057
DUSP27	1	10	rs6427063	165343158	1.82e-08	0.0185	0.00513	0.00136	0.00406
POU2F1	1	17	rs2093658	165621816	2.15e-07	4.74e-05	0.00445	1.34e-07	0.00852
CD247	1	18	rs863455	165724448	3.94e-22	0.000227	0.01322	4.12e-12	0.01371
CREG1	1	7	rs12022039	165780821	5.3e-18	0.00262	0.01058	2.04e-10	0.01158
RCSD1	1	12	rs1229383	165881577	1.02e-18	0.00018	0.01099	5.69e-12	0.01326
MPZL1	1	11	rs16859532	165985924	3.24e-12	0.00132	0.00727	1.77e-06	0.00729
SAC	1	10	rs204262	166081092	8.33e-24	0.000201	0.01391	1.48e-13	0.015
BRP44	1	1	rs10489202	166169703	0.68	0.68	0.00028	0.442	0.00085
IQWD1	1	5	rs11558511	166280474	7.17e-09	0.0168	0.00531	1.95e-05	0.00612
GPR161	1	5	rs11805261	166361885	6.3e-05	0.00252	0.00298	0.000147	0.00513
TIPRL	1	5	rs2281014	166430462	5.47e-16	3.17e-12	0.00943	2.29e-10	0.01153
SFT2D2	1	1	rs2235180	166465881	2.03e-12	2.03e-12	0.00742	3.15e-06	0.00705
TBX19	1	6	rs2072739	166536734	1.09e-09	0.00619	0.00579	0.00105	0.00416
XCL1	1	1	rs6427130	166816046	8.11e-06	8.11e-06	0.00356	0.000245	0.00494
DPT	1	17	rs6427142	166937301	9.39e-07	0.00108	0.00407	7.22e-05	0.00548
ATP1B1	1	10	rs1040502	167354756	4.39e-13	1.6e-05	0.00776	2.88e-09	0.01033
NME7	1	41	rs10800418	167450009	1.37e-34	3.5e-15	0.02	6.68e-22	0.02386
BLZF1	1	6	rs2271762	167614169	1.54e-12	5.82e-11	0.00745	3.35e-07	0.00808
C1orf114	1	6	rs4656677	167655818	6.37e-30	2.28e-07	0.01736	1.2e-18	0.0204
SLC19A2	1	1	rs1983546	167712807	2.15e-18	2.15e-18	0.01082	7.08e-11	0.0121
F5	1	25	rs6427197	167767214	6.96e-07	0.0253	0.00415	1.61e-05	0.00621
SELP	1	16	rs3917820	167831369	2.94e-12	9.47e-06	0.00728	0.00677	0.00321
SELL	1	14	rs2205848	167942917	1.83e-12	0.00542	0.0074	2.97e-07	0.00814
SELE	1	10	rs3917412	167967126	1.44e-12	2.94e-05	0.00746	1.93e-07	0.00834
C1orf112	1	10	rs7530237	168084814	7.94e-12	1.24e-06	0.00703	1.35e-06	0.00741
SCYL3	1	12	rs9287097	168090969	6.1e-12	0.00444	0.0071	1.33e-06	0.00741
KIFAP3	1	25	rs2750016	168175726	3.68e-17	0.00279	0.0101	3.65e-08	0.00913
C1orf184	1	2	rs495524	168395232	1.17e-05	0.00449	0.00342	0.289	0.00113
LOC100129153	1	1	rs12135132	168760254	0.000348	0.000348	0.00253	0.0166	0.00274
SCYL1BP1	1	2	rs16863425	168786508	1.47e-10	4.82e-07	0.0063	0.000182	0.00503
PRRX1	1	3	rs593479	168909523	2.39e-12	0.0446	0.00733	4.44e-05	0.00572
C1orf129	1	9	rs16863900	169220888	2.64e-09	0.000219	0.00557	0.000255	0.00486
LOC646804	1	2	rs10910879	169319777	3.73e-10	0.00463	0.00607	0.000198	0.00499
FMO3	1	6	rs2266780	169349866	2.29e-12	0.0415	0.00736	9.95e-07	0.00756
FMO2	1	12	rs4916183	169437357	0.000337	0.194	0.00254	0.000313	0.00477
FMO1	1	6	rs4916273	169489758	0.0102	0.0506	0.00161	0.0244	0.00253
FMO4	1	1	rs12089574	169566795	0.00806	0.00806	0.00174	0.00445	0.00353
BAT2D1	1	16	rs4916388	169729924	1.37e-08	0.00346	0.00515	0.00039	0.00465
MYOC	1	3	rs235875	169880379	4.42e-07	0.000184	0.00426	0.000297	0.00478
VAMP4	1	1	rs10913529	169946088	4.08e-05	4.08e-05	0.0031	0.000149	0.00512
LOC730053	1	2	rs17596081	170012899	5.41e-06	0.0853	0.00363	0.0157	0.00278
KIAA0859	1	4	rs2232825	170030172	6.15e-06	0.0787	0.0036	0.0236	0.00256
LOC100128178	1	22	rs495590	170389432	1.87e-12	0.00139	0.00744	0.000257	0.00487
DNM3	1	70	rs10489286	170579542	2.11e-21	0.000775	0.01253	2.94e-09	0.01033
LOC100131486	1	2	rs1011731	170613171	1.86e-07	7.22e-05	0.00452	1.14e-05	0.00643
C1orf105	1	6	rs4244193	170702074	1.02e-15	4.57e-07	0.00928	2.46e-08	0.00933
C1orf9	1	5	rs10911920	170797310	0.00246	0.00441	0.002	0.0521	0.00212
FASLG	1	2	rs929087	170898680	3.56e-05	0.00249	0.00315	0.000452	0.00462
TNFSF18	1	1	rs6425201	171279427	0.1	0.1	0.00095	0.473	0.0008
TNFSF4	1	5	rs7514229	171420927	8.08e-14	1.92e-08	0.00818	1.45e-07	0.00848
LOC730070	1	3	rs7550607	171581641	9.22e-07	2.09e-05	0.00407	0.000715	0.00435
LOC646870	1	16	rs17350697	171600539	2.89e-13	0.000492	0.00788	4.36e-09	0.01017
PRDX6	1	1	rs7540065	171715659	0.166	0.166	0.00079	0.558	0.00068
SLC9A11	1	15	rs728908	171755072	6.8e-08	1.4e-05	0.00474	0.00168	0.00392
LOC730159	1	1	rs12067170	171872830	5.99e-08	5.99e-08	0.00499	0.000536	0.00469
ANKRD45	1	3	rs12075071	171883148	3.24e-08	5.99e-08	0.00506	0.00105	0.00428
KLHL20	1	1	rs10912671	171956514	0.0147	0.0147	0.0015	0.183	0.00141
CENPL	1	1	rs2144708	172046742	0.0142	0.0142	0.00151	0.192	0.00138
DARS2	1	3	rs2295366	172092315	3.19e-05	0.000234	0.00315	0.0213	0.00261
ZBTB37	1	1	rs941987	172107422	0.112	0.112	0.00093	0.348	0.00102
SERPINC1	1	5	rs941989	172148494	4.68e-08	0.151	0.00484	0.0071	0.00318
RC3H1	1	1	rs7547880	172219767	0.00011	0.00011	0.00283	0.0908	0.00182
RABGAP1L	1	43	rs17373189	172636390	1.95e-06	0.000132	0.00389	0.000104	0.00531
CACYBP	1	1	rs7537508	173237128	0.342	0.342	0.00055	0.123	0.00165
MRPS14	1	1	rs10489330	173251508	0.000217	0.000217	0.00265	0.000361	0.00469
TNN	1	16	rs4633248	173377103	6.94e-07	0.337	0.00425	4.74e-05	0.00582
KIAA0040	1	6	rs6929	173393344	2.47e-19	3.83e-05	0.01134	1.82e-11	0.01272
LOC100129443	1	9	rs13374887	173398585	3.33e-15	3.48e-05	0.00898	1.56e-10	0.01171
TNR	1	104	rs10913032	173858589	1.18e-21	7.56e-05	0.01269	5.12e-14	0.01549
LOC100128153	1	4	rs505189	174110108	2.31e-17	0.16	0.01022	3.75e-08	0.00912
RFWD2	1	20	rs3845368	174399939	5.32e-20	0.0292	0.0124	2.39e-11	0.01305
PAPPA2	1	53	rs742473	174726332	4.4e-14	0.00161	0.00833	2.03e-09	0.0105
ASTN1	1	67	rs17314087	175339892	4.27e-14	0.000156	0.00834	2.26e-07	0.00826
FAM5B	1	19	rs17314596	175413784	1.88e-08	0.00197	0.00509	0.00123	0.00409
LOC400796	1	24	rs7543170	175748715	2.55e-09	0.00638	0.00559	6.99e-06	0.00663
SEC16B	1	12	rs1889981	176201673	3.4e-14	0.000309	0.00843	1.04e-07	0.00867
LOC730102	1	7	rs7531837	176246843	5.08e-10	3.47e-05	0.00599	2.18e-05	0.00607
LOC100131700	1	2	rs10753177	176275096	0.000501	0.0571	0.00243	0.0202	0.00264
RASAL2	1	15	rs3791025	176624530	3.12e-09	3.89e-06	0.00552	9.47e-07	0.00758
FLJ44005	1	1	rs2746325	176730214	0.000103	0.000103	0.00285	0.0261	0.0025
C1orf49	1	3	rs4387136	176755217	0.000277	0.0097	0.00259	0.457	0.00082
C1orf220	1	1	rs4650994	176781935	0.045	0.045	0.00119	0.00551	0.00333
ANGPTL1	1	1	rs17725459	177104622	2.44e-14	2.44e-14	0.00848	5.58e-06	0.00672
RALGPS2	1	9	rs17725459	177104622	2.44e-14	0.0076	0.00848	5.58e-06	0.00672
FAM20B	1	4	rs12083856	177304778	1.16e-08	0.0193	0.00519	0.0205	0.00263
TOR3A	1	3	rs1570807	177327731	0.201	0.504	0.00072	0.167	0.00146
ABL2	1	7	rs2274230	177350703	2.51e-07	0.162	0.00441	3.34e-05	0.00586
SOAT1	1	8	rs12038140	177571147	0.000239	0.00644	0.00263	0.0338	0.00236
C1orf125	1	26	rs16854064	177629898	1.8e-11	0.00352	0.00683	2.32e-07	0.00825
LOC730179	1	4	rs10494515	177783763	3.14e-08	0.000138	0.00498	1.44e-05	0.00633
NPHS2	1	3	rs749960	177810778	3.91e-05	0.000837	0.00316	0.0947	0.00183
TDRD5	1	15	rs4652421	177830340	2.57e-07	0.0295	0.00452	0.00533	0.00341
C1orf76	1	14	rs1148825	178040788	2.41e-08	0.0486	0.005	1.27e-05	0.00633
TOR1AIP2	1	3	rs17279483	178088067	5.97e-07	0.00109	0.0042	0.0113	0.00295
TOR1AIP1	1	3	rs12062383	178147627	0.0805	0.309	0.00101	0.333	0.00104
CEP350	1	10	rs16855289	178346936	0.000323	0.117	0.00255	0.0104	0.00299
QSOX1	1	6	rs3767183	178409687	1.14e-12	0.0503	0.00752	7.27e-09	0.0099
LHX4	1	9	rs7525475	178473437	1.44e-11	0.000212	0.00688	3.99e-06	0.00689
ACBD6	1	12	rs12691484	178611415	0.000493	0.0857	0.00243	0.00512	0.00335
XPR1	1	14	rs10914076	178943270	2.65e-05	0.00106	0.00321	0.0018	0.00389
KIAA1614	1	2	rs3845412	179159784	0.000607	0.03	0.00238	0.0041	0.00346
STX6	1	8	rs6665134	179216251	2.57e-05	0.00424	0.00324	0.000142	0.00519
CACNA1E	1	60	rs6681017	179774949	1.94e-11	0.0293	0.0068	2.4e-05	0.00602
LOC100130996	1	3	rs1779824	180438056	5.11e-06	1.01e-05	0.00363	2.44e-06	0.00712
LOC730144	1	2	rs2985441	180571770	0.0176	0.0282	0.00145	0.671	0.00053
TEDDM1	1	4	rs7551829	180636361	6.01e-15	5.53e-05	0.00883	5.59e-09	0.01002
RGSL1	1	16	rs16859058	180723046	9.46e-09	0.00417	0.00524	0.000222	0.00493
LOC100128746	1	4	rs12736689	180816352	3.69e-08	1.63e-05	0.0049	0.000187	0.00501
RNASEL	1	5	rs12736689	180816352	3.69e-08	1.63e-05	0.0049	0.000187	0.00501
LOC284648	1	2	rs511918	180846225	1.09e-05	0.41	0.00343	0.00174	0.0039
RGS8	1	6	rs10489965	180889902	3.82e-10	4.46e-07	0.00617	0.000197	0.00509
NPL	1	2	rs3818805	181047556	8.04e-09	0.000335	0.00529	8.18e-05	0.00542
DHX9	1	4	rs7513997	181100738	3.82e-06	0.000468	0.00371	0.00107	0.00414
LAMC1	1	21	rs10797829	181299851	4.09e-10	6.98e-07	0.00604	6.29e-07	0.00777
LAMC2	1	22	rs2021958	181459551	2e-18	1.23e-07	0.01082	1.49e-10	0.01173
NMNAT2	1	22	rs16860727	181508404	5.65e-19	0.00273	0.01113	6.91e-10	0.01101
SMG7	1	4	rs2298083	181782051	4.31e-08	0.000217	0.00486	5.07e-06	0.00677
NCF2	1	5	rs11811630	181800533	3.43e-05	0.000113	0.00313	0.144	0.00155
LOC100132985	1	25	rs2761559	181846902	0.0329	0.124	0.00127	0.0264	0.00249
ARPC5	1	2	rs2254972	181869418	0.106	0.117	0.00093	0.0385	0.00229
APOBEC4	1	2	rs6661715	181888937	0.168	0.169	0.00078	1	1e-05
RGL1	1	49	rs17502872	182079521	1.44e-24	0.0551	0.01488	8.8e-12	0.01356
GLT25D2	1	26	rs12096645	182196394	9.49e-16	0.00165	0.00929	1.56e-07	0.00844
C1orf19	1	1	rs11582961	182289682	0.381	0.381	0.00051	0.806	0.00037
C1orf21	1	31	rs8972	182864622	2.3e-12	0.00933	0.00734	0.000128	0.0052
EDEM3	1	3	rs12567226	182944913	1.48e-07	2.55e-06	0.00454	0.000166	0.00507
FAM129A	1	25	rs234099	183204350	1.97e-08	0.000563	0.00506	0.003	0.00362
RNF2	1	3	rs17379801	183307081	5e-07	0.0102	0.00423	4.77e-05	0.00568
C1orf25	1	2	rs12086086	183363199	0.11	0.686	0.00091	0.089	0.00183
C1orf26	1	9	rs17519029	183474050	0.000448	0.337	0.00246	0.00309	0.00361
IVNS1ABP	1	1	rs10911702	183539217	0.706	0.706	0.00026	0.882	0.00027
HMCN1	1	38	rs17531405	184380475	1.1e-10	0.00284	0.00637	4.08e-05	0.00576
PRG4	1	1	rs7756	184548319	1.33e-06	1.33e-06	0.00419	0.00402	0.00365
TPR	1	9	rs3124814	184606501	4.27e-08	1.84e-06	0.00487	0.000375	0.00468
C1orf27	1	2	rs3108517	184632929	0.000327	0.026	0.00254	0.0121	0.0029
PTGS2	1	1	rs2206593	184909052	0.0209	0.0209	0.00143	0.119	0.00169
PLA2G4A	1	22	rs10911963	185178610	3.17e-15	0.00105	0.00899	3.54e-08	0.00915
FAM5C	1	37	rs1540513	188568155	6.77e-18	1.16e-05	0.01055	8.56e-11	0.01203
RGS18	1	1	rs16829396	190402989	0.13	0.13	0.00086	0.0787	0.0019
RGS21	1	3	rs1416500	190570091	0.00213	0.0023	0.00204	0.0295	0.00243
RGS13	1	5	rs17644455	190894603	0.00111	0.0186	0.00221	0.0974	0.00178
LOC388720	1	5	rs16834649	190934510	0.126	0.319	0.00088	0.38	0.00095
UCHL5	1	3	rs2887640	191294457	0.207	0.537	0.00073	0.545	0.00071
TROVE2	1	1	rs10801173	191321108	0.111	0.111	0.00092	0.743	0.00045
CDC73	1	9	rs7551275	191374419	0.000289	0.105	0.00257	0.045	0.0022
B3GALT2	1	3	rs28930674	191416842	0.168	0.17	0.00078	0.341	0.00102
KCNT2	1	19	rs2878551	194636570	9.96e-13	0.0264	0.00758	2.11e-07	0.00833
CFH	1	11	rs742855	194972143	8.51e-10	0.000147	0.00586	3.74e-06	0.00692
CFHR4	1	2	rs1853883	195148223	0.0104	0.0606	0.0016	0.0418	0.00225
CFHR2	1	1	rs6674522	195182982	0.471	0.471	0.00043	0.884	0.00026
F13B	1	4	rs1627765	195299666	5.62e-05	0.00422	0.00301	0.0874	0.00184
ASPM	1	3	rs3891964	195332697	2.55e-05	3.68e-05	0.00322	0.0946	0.00179
ZBTB41	1	1	rs4639796	195393272	0.000549	0.000549	0.00243	0.0477	0.0022
CRB1	1	13	rs2786107	195577400	5.93e-12	0.000805	0.0071	0.000132	0.00518
C1orf218	1	2	rs4915550	195774888	0.747	0.787	0.00024	0.818	0.00035
DENND1B	1	10	rs11583319	195822483	3.34e-06	0.588	0.00378	0.00472	0.00342
LHX9	1	1	rs10801633	196164119	0.69	0.69	0.00027	0.473	0.0008
NEK7	1	6	rs7546420	196526303	3.84e-24	1.4e-11	0.01408	4.7e-11	0.01227
ATP6V1G3	1	1	rs16843265	196773681	1.51e-10	1.51e-10	0.00631	4.84e-05	0.00569
PTPRC	1	9	rs7555443	196973840	2.26e-08	0.0132	0.00502	5.96e-06	0.00669
NR5A2	1	37	rs2821391	198303413	1.1e-07	0.0322	0.00462	8.45e-06	0.00653
KIF14	1	2	rs4504918	198824390	0.109	0.364	0.00092	0.23	0.00127
DDX59	1	5	rs7539252	198896407	1.82e-07	0.0339	0.00449	0.000166	0.00507
CAMSAP1L1	1	3	rs2292095	199093018	4.48e-09	0.0874	0.00559	0.000702	0.0045
C1orf106	1	3	rs7554511	199144185	8.2e-08	1.65e-06	0.00469	8.14e-06	0.00654
C1orf81	1	6	rs1572789	199198928	5.41e-09	0.134	0.00538	1.58e-08	0.00953
KIF21B	1	5	rs12122721	199251103	8.07e-08	9.17e-06	0.0047	3.66e-06	0.00693
CACNA1S	1	17	rs9427713	199307987	1.45e-12	0.00176	0.00747	1.09e-08	0.00972
ASCL5	1	4	rs942702	199355512	2.11e-11	0.773	0.00679	6.67e-05	0.00552
TMEM9	1	5	rs2147797	199385327	1.79e-08	0.00492	0.00508	0.00149	0.00398
LOC440706	1	5	rs10157719	199437194	9.27e-10	0.00213	0.00583	6.02e-06	0.00669
DKFZp434B1231	1	3	rs12466	199464431	1.24e-06	0.00182	0.00401	0.0173	0.00272
PKP1	1	18	rs832174	199525142	1.24e-06	0.0132	0.00399	0.0394	0.00228
TNNT2	1	6	rs12563097	199611269	5.11e-08	0.00418	0.00481	0.00857	0.00308
LAD1	1	2	rs6671391	199626320	0.000402	0.00172	0.00249	0.0168	0.00273
TNNI1	1	1	rs12064327	199651401	0.0359	0.0359	0.00129	0.111	0.00176
CSRP1	1	11	rs7527761	199726875	1.34e-05	0.0126	0.0034	0.0115	0.00294
LOC376693	1	1	rs4915530	199756263	0.0654	0.0654	0.00107	0.53	0.00072
NAV1	1	28	rs1022361	200056893	3.13e-10	0.063	0.00611	1.03e-06	0.00754
IPO9	1	2	rs950114	200106833	1.28e-06	0.00034	0.004	2.23e-07	0.00828
LMOD1	1	6	rs2819346	200148710	5.97e-26	5.61e-10	0.01512	1.85e-14	0.01595
TIMM17A	1	1	rs1045893	200206375	0.0754	0.0754	0.00103	0.389	0.00093
RNPEP	1	3	rs10800806	200239744	4.5e-06	0.000293	0.00366	7.06e-05	0.00549
GPR37L1	1	2	rs7516762	200359203	6.36e-06	0.000364	0.00357	0.000284	0.00481
ARL8A	1	2	rs17488131	200374750	3.65e-10	0.128	0.00607	0.000962	0.0042
LGR6	1	21	rs16849773	200470836	9.21e-11	0.043	0.00641	0.00162	0.00394
PPP1R12B	1	13	rs6658708	200588736	0.00301	0.0114	0.00194	0.0177	0.0027
SYT2	1	19	rs7517270	200866366	1.42e-05	0.0219	0.00337	0.00913	0.00305
JARID1B	1	9	rs10494838	200985598	0.000295	0.2	0.00258	0.033	0.00238
LOC641515	1	2	rs10920493	201060623	0.000316	0.000364	0.00255	0.00644	0.00323
RABIF	1	1	rs6699298	201120216	2.59e-12	2.59e-12	0.00731	7.46e-07	0.00769
ADIPOR1	1	2	rs16850797	201183306	0.000441	0.289	0.00256	0.0742	0.00201
CYB5R1	1	2	rs2232847	201200280	2.63e-06	0.00516	0.0038	0.0274	0.00247
TMEM183A	1	2	rs1418444	201244655	2.72e-10	0.0345	0.00614	1.21e-05	0.00635
PPFIA4	1	8	rs3737879	201313402	1.26e-05	0.142	0.0034	0.0228	0.00257
ADORA1	1	6	rs16851020	201400275	1.34e-13	0.00234	0.00806	1.84e-08	0.00946
MYBPH	1	1	rs3737872	201410018	0.0749	0.0749	0.00103	0.0259	0.00251
CHI3L1	1	1	rs2071580	201415777	0.121	0.121	0.00089	0.186	0.0014
CHIT1	1	4	rs2486961	201458527	0.016	0.0825	0.00148	0.00642	0.00323
LOC730226	1	5	rs7551146	201510736	2.56e-15	4.85e-05	0.00904	1.6e-05	0.00621
LOC730227	1	3	rs10920606	201539844	1.44e-13	6.17e-08	0.00805	3.46e-09	0.01026
BTG2	1	1	rs12085417	201543676	2.14e-13	2.14e-13	0.00795	5.49e-09	0.01004
FMOD	1	4	rs10128007	201586362	2.54e-06	0.000729	0.00383	0.0122	0.00291
ATP2B4	1	13	rs6594013	201925428	1.47e-12	0.00429	0.00746	3.18e-11	0.01246
LAX1	1	2	rs7540760	202001608	0.0212	0.105	0.0014	0.0491	0.00216
LOC100131402	1	2	rs7552670	202034951	0.00332	0.00405	0.00192	0.35	0.00101
ZC3H11A	1	7	rs4951022	202051616	0.000305	0.00332	0.00257	0.0423	0.00224
SNRPE	1	3	rs6696091	202104200	0.000698	0.764	0.00234	0.0161	0.00276
SOX13	1	12	rs1534097	202336581	1.27e-06	0.000386	0.00401	0.00797	0.00314
ETNK2	1	5	rs3737656	202377283	4.62e-07	0.0557	0.00425	5.44e-05	0.00562
REN	1	5	rs10900555	202398933	5.55e-05	0.00308	0.00302	0.000278	0.00483
KISS1	1	4	rs7538038	202427649	8.66e-06	4.98e-05	0.00352	0.0066	0.00325
GOLT1A	1	3	rs6685338	202442351	7.57e-09	0.000105	0.00538	5.44e-06	0.00681
PLEKHA6	1	41	rs16853233	202527683	1.91e-11	0.00443	0.00682	8.05e-05	0.00543
PIK3C2B	1	7	rs2137255	202692996	0.000487	0.00446	0.00243	0.0806	0.00188
MDM4	1	8	rs4252718	202778818	6.35e-07	4.75e-05	0.00417	0.00995	0.00301
LRRN2	1	15	rs2772229	202893675	9.45e-12	0.00286	0.00699	8.47e-05	0.00541
NFASC	1	40	rs2794866	203255158	1.28e-16	0.0633	0.00979	3.55e-09	0.01024
CNTN2	1	8	rs895932	203289637	2.39e-05	0.308	0.00328	4.01e-05	0.00586
TMEM81	1	2	rs4951168	203319842	0.000576	0.0066	0.00239	0.0157	0.00277
RBBP5	1	5	rs2050957	203336050	6.83e-06	0.0074	0.00356	0.000295	0.00479
RIPK5	1	4	rs10494860	203434422	0.0137	0.118	0.00152	0.0127	0.00289
TMCC2	1	8	rs1172111	203499603	2.2e-05	0.0307	0.00325	0.0185	0.00268
NUAK2	1	2	rs10793728	203540797	0.000348	0.00447	0.00252	0.00176	0.0039
KLHDC8A	1	5	rs4951200	203580544	5.29e-17	2.4e-07	0.01027	7.49e-07	0.00787
LEMD1	1	1	rs1928442	203635698	0.196	0.196	0.00073	0.146	0.00154
LOC284577	1	2	rs6692041	203701366	2.42e-27	4.68e-26	0.0159	1.95e-15	0.01698
PCTK3	1	3	rs10494870	203742812	9.07e-13	0.171	0.00773	1.24e-08	0.00985
MFSD4	1	6	rs7533594	203825025	2.88e-07	0.3	0.00437	0.00556	0.00331
ELK4	1	1	rs4245717	203862376	1.35e-06	1.35e-06	0.00402	0.000102	0.00537
SLC45A3	1	2	rs2153904	203909413	7.53e-26	0.000291	0.01505	6.95e-16	0.01747
LOC100130123	1	1	rs951366	203951975	1.08e-06	1.08e-06	0.00404	2e-05	0.00612
NUCKS1	1	1	rs1620334	203964468	0.000259	0.000259	0.00262	0.063	0.00203
RAB7L1	1	1	rs823142	204008439	0.000127	0.000127	0.00282	0.108	0.00173
SLC41A1	1	3	rs823066	204037796	2.7e-08	0.404	0.00498	2.9e-05	0.00592
PM20D1	1	4	rs7517009	204082615	0.00184	0.211	0.00208	0.103	0.00174
SLC26A9	1	6	rs12727528	204161225	1.76e-09	0.172	0.00571	1.63e-07	0.0085
SRGAP2	1	14	rs3813980	204703756	8.06e-32	0.00549	0.01844	8.87e-16	0.01734
RASSF5	1	15	rs2297551	204820398	3.2e-22	9.35e-07	0.01301	2.68e-15	0.01684
LGTN	1	1	rs11119107	204834561	0.118	0.118	0.0009	0.409	0.00091
MAPKAPK2	1	4	rs4129024	204934868	1.12e-41	0.0004	0.02411	1.01e-20	0.0227
IL19	1	14	rs17016339	205048689	4.16e-28	1.73e-10	0.01722	6.83e-13	0.01489
IL20	1	1	rs2981573	205107200	0.00143	0.00143	0.00215	0.0622	0.00203
PIGR	1	2	rs291092	205179853	3.63e-14	4.32e-10	0.00838	9.01e-07	0.0076
FCAMR	1	2	rs12119983	205198194	1.34e-16	0.0586	0.00978	1.35e-08	0.0096
C1orf116	1	1	rs3020	205258559	2.43e-05	2.43e-05	0.00323	0.000508	0.00452
PFKFB2	1	3	rs6673109	205319756	3.46e-10	4.74e-09	0.00621	1.62e-05	0.00624
C4BPB	1	3	rs8942	205336542	6.09e-21	1.01e-09	0.0125	3.25e-11	0.01263
C4BPA	1	2	rs4844573	205371523	0.00695	0.0405	0.00171	0.677	0.00052
LOC100129101	1	19	rs1429907	205427634	2.44e-15	0.000516	0.00906	8.95e-10	0.01089
CD55	1	2	rs4844590	205562752	5.86e-11	0.000536	0.00653	6.99e-07	0.00772
CR2	1	8	rs12032512	205719801	1.32e-12	3.4e-07	0.00748	1.75e-08	0.00948
CR1	1	9	rs2274566	205819968	6.11e-28	1.39e-18	0.01626	1.52e-19	0.02137
CR1L	1	10	rs11118345	205921450	2.11e-05	0.0136	0.00326	0.00758	0.00315
CD46	1	2	rs7144	206034342	3.02e-22	5.33e-09	0.01301	3e-08	0.00924
LOC100128537	1	8	rs2745980	206084990	1.62e-19	1.54e-05	0.01148	1.53e-07	0.00848
CD34	1	9	rs656801	206144266	5.22e-10	0.00477	0.00598	2.87e-05	0.00593
PLXNA2	1	47	rs6702082	206273569	1.67e-18	0.00175	0.01087	5.82e-10	0.01109
LOC642587	1	3	rs2294938	207670619	0.00112	0.0014	0.00221	0.00225	0.00378
CAMK1G	1	7	rs2281139	207841512	0.000109	0.00692	0.00283	0.114	0.00169
LAMB3	1	16	rs2236893	207871287	0.000263	0.155	0.0026	0.00931	0.00305
HSD11B1	1	5	rs7539852	207965162	1.18e-16	7.02e-08	0.00988	2.22e-05	0.00611
TRAF3IP3	1	5	rs909710	207997317	2.83e-20	0.00242	0.01189	1.02e-07	0.00864
C1orf74	1	1	rs651141	208022471	3.2e-14	3.2e-14	0.00843	7.96e-07	0.00768
IRF6	1	7	rs17317411	208027937	5.77e-05	0.000351	0.003	0.00227	0.00377
C1orf107	1	4	rs9308411	208072336	2.82e-07	0.000441	0.00444	0.000376	0.00471
SYT14	1	22	rs2743891	208294754	1.45e-10	3.91e-07	0.00631	1.75e-05	0.00617
HHAT	1	71	rs6683265	208830427	1.97e-09	0.0147	0.00575	6.3e-05	0.00564
KCNH1	1	74	rs1539531	209149546	7.33e-13	0.00295	0.00763	6.81e-06	0.00663
RCOR3	1	2	rs6671526	209504835	0.429	0.489	0.00047	0.232	0.00127
TRAF5	1	10	rs17017432	209611717	0.00221	0.0732	0.00203	0.033	0.00237
C1orf97	1	1	rs784380	209634178	0.162	0.162	0.00081	0.104	0.00176
RD3	1	2	rs11119748	209718808	0.00516	0.0151	0.0018	0.0145	0.00281
SLC30A1	1	1	rs2278652	209817648	5.9e-13	5.9e-13	0.00768	7.94e-05	0.00543
NEK2	1	2	rs785318	209913038	0.00223	0.251	0.00203	0.000657	0.0044
LPGAT1	1	5	rs6540709	210057165	1.04e-08	1.16e-05	0.00522	0.000542	0.00449
INTS7	1	9	rs2788130	210200533	2.97e-08	0.186	0.00495	0.00218	0.00379
LOC100131205	1	2	rs2993546	210293910	9.18e-09	0.0764	0.00525	0.00119	0.00409
DTL	1	6	rs2993546	210293910	9.18e-09	0.0764	0.00525	0.00119	0.00409
LOC643143	1	10	rs351377	210492394	3.25e-07	0.000103	0.00436	3.24e-05	0.00589
PPP2R5A	1	6	rs351393	210543142	4.99e-05	0.00735	0.00304	0.000288	0.0048
C1orf75	1	6	rs792448	210625020	4.09e-07	0.0231	0.00428	0.00013	0.00519
ATF3	1	11	rs10494954	210845130	1.09e-19	1.03e-05	0.01155	6.87e-15	0.01639
FAM71A	1	1	rs17019481	210865224	1.68e-05	1.68e-05	0.00332	0.00681	0.0032
BATF3	1	1	rs3768547	210937704	4.14e-06	4.14e-06	0.00371	0.00295	0.00366
NSL1	1	8	rs4951638	210997838	3.95e-10	0.0116	0.00605	0.021	0.00261
TATDN3	1	4	rs17019726	211035751	0.00749	0.0248	0.00172	0.155	0.00152
LOC149643	1	2	rs6696870	211071967	0.00158	0.114	0.00212	0.0677	0.00198
FLVCR1	1	6	rs963328	211104284	0.00241	0.0198	0.00201	0.757	0.00043
VASH2	1	4	rs6688043	211226768	9.94e-06	0.00327	0.00346	0.000689	0.00436
ANGEL2	1	4	rs10157273	211240485	7.23e-08	0.0356	0.00481	6.4e-05	0.00562
RPS6KC1	1	7	rs4951477	211299178	0.00025	0.249	0.00261	0.544	0.0007
LOC643330	1	9	rs320453	211683902	4.43e-11	0.669	0.0066	1.44e-08	0.00957
PROX1	1	5	rs4655313	212233915	1.08e-06	3.58e-05	0.00415	0.00154	0.00406
LOC100131420	1	2	rs6682161	212526781	0.371	0.371	0.00052	0.556	0.00068
SMYD2	1	20	rs6540821	212561921	1.89e-13	0.0115	0.00797	2.19e-08	0.00937
PTPN14	1	53	rs3013451	212617899	8.83e-19	0.0451	0.01102	3.25e-07	0.00809
CENPF	1	8	rs2290199	212903959	0.00217	0.0898	0.00203	0.0518	0.00213
KCNK2	1	44	rs2802652	213292133	3.92e-16	5.46e-07	0.00951	4.2e-10	0.01124
USH2A	1	130	rs7512548	214050025	4.11e-19	0.00759	0.01128	2.45e-07	0.00826
ESRRG	1	137	rs7540059	215303819	4.26e-12	0.0243	0.00719	1.36e-07	0.0085
GPATCH2	1	17	rs17041570	215734953	6.73e-27	2.64e-05	0.01627	3.62e-16	0.01864
SPATA17	1	20	rs7525422	215991112	8.48e-13	8.88e-05	0.00759	3.45e-07	0.00806
RRP15	1	3	rs1933641	216535584	1.82e-08	2.04e-07	0.00512	0.000102	0.00535
TGFB2	1	14	rs10482751	216622920	4.75e-13	0.00505	0.00774	4.59e-07	0.00792
LOC643717	1	5	rs6541157	217172752	1.39e-19	0.000127	0.01173	6.14e-11	0.01243
LOC643723	1	6	rs4846532	217395980	2.73e-12	1.8e-06	0.0073	1.25e-06	0.00744
LYPLAL1	1	3	rs10863436	217434674	3.01e-06	0.000138	0.00378	0.00409	0.00347
LOC728510	1	7	rs2605091	217706928	5.82e-14	2.86e-07	0.00826	3.07e-07	0.00812
LOC728518	1	2	rs1009859	217858445	2.98e-11	1.49e-07	0.00672	4.02e-05	0.00579
SLC30A10	1	1	rs2275706	218154326	5.76e-06	5.76e-06	0.0036	0.0224	0.00258
LOC728528	1	4	rs2647442	218184473	1.05e-10	0.269	0.00652	0.000185	0.00513
EPRS	1	19	rs2647436	218224538	0.000715	0.0319	0.00233	0.00166	0.00392
BPNT1	1	3	rs17563262	218307485	9.15e-05	0.00115	0.00288	0.251	0.00122
IARS2	1	2	rs17563518	218342927	0.00114	0.351	0.00222	0.326	0.00105
RAB3GAP2	1	11	rs10127631	218468791	0.000157	0.0549	0.00274	0.00182	0.00388
MARK1	1	5	rs11118573	218800553	2.85e-18	4.6e-11	0.01073	6.09e-10	0.01107
C1orf115	1	2	rs427216	218932368	3.92e-21	3.25e-19	0.01249	3.05e-09	0.0104
MOSC2	1	4	rs337147	219007034	9.28e-21	8.15e-20	0.01215	1.06e-09	0.0108
MOSC1	1	8	rs7536276	219027538	4.71e-25	0.00452	0.01518	2.34e-10	0.01189
LOC100129376	1	7	rs2131887	219074478	5.43e-05	0.0237	0.00304	0.000448	0.0046
HLX	1	2	rs2247213	219122086	0.00465	0.0867	0.00184	0.0155	0.00279
DUSP10	1	5	rs6670514	219959288	9.36e-05	0.0897	0.00288	0.141	0.00156
KIAA1822L	1	2	rs17163185	220784321	1.42e-07	0.000634	0.00456	2.59e-06	0.0071
TAF1A	1	2	rs2936041	220829396	0.00797	0.0608	0.00169	0.0865	0.00185
MIA3	1	3	rs2133188	220880376	7.56e-05	0.13	0.00293	0.000891	0.00424
C1orf80	1	1	rs11487815	220921819	0.119	0.119	0.0009	0.145	0.00156
C1orf58	1	2	rs4240934	220970921	0.000152	0.000659	0.00274	0.000451	0.00458
FLJ43505	1	1	rs17011714	220988791	3.24e-10	3.24e-10	0.0061	1.41e-05	0.00627
DISP1	1	8	rs2254155	221239258	1.82e-06	0.00142	0.0039	0.0543	0.0021
TLR5	1	5	rs2241097	221367336	0.00115	0.223	0.0022	0.0843	0.00186
SUSD4	1	20	rs712856	221534959	4.83e-12	0.0478	0.00716	8.13e-05	0.00542
CAPN8	1	5	rs2404354	221907021	5.28e-16	0.00011	0.00944	6.79e-06	0.00663
CAPN2	1	11	rs10495215	221970404	0.00319	0.103	0.00193	0.134	0.00159
TP53BP2	1	11	rs1153937	222045867	3.13e-26	3.28e-06	0.01553	7.02e-11	0.01209
LOC728531	1	1	rs2404851	222264977	0.438	0.438	0.00046	0.491	0.00077
FBXO28	1	2	rs869945	222388260	2.95e-05	0.000179	0.00317	0.000113	0.00526
DEGS1	1	1	rs4653996	222440231	0.0166	0.0166	0.00147	0.103	0.00174
NVL	1	4	rs16846649	222580595	0.00273	0.0568	0.00197	0.0183	0.00269
CNIH4	1	2	rs6675858	222626559	1.49e-08	0.000449	0.0052	2.77e-05	0.006
WDR26	1	4	rs2897048	222677530	7.77e-08	3.46e-06	0.00471	1.01e-05	0.00643
CNIH3	1	31	rs6668249	222965456	1.61e-10	7.98e-06	0.00627	6.53e-09	0.00995
C1orf67	1	4	rs2501066	223205176	1.3e-05	0.00261	0.0034	0.0224	0.00259
DNAH14	1	36	rs1506073	223301703	1.29e-08	0.0312	0.00516	0.00659	0.00322
LBR	1	2	rs6686611	223677529	0.11	0.357	0.00091	0.131	0.0016
ENAH	1	16	rs2840959	223871477	4.21e-07	0.0025	0.00428	0.000147	0.00513
EPHX1	1	3	rs3738043	224081922	0.000567	0.00415	0.0024	0.0258	0.00251
TMEM63A	1	9	rs360089	224124954	0.000424	0.0133	0.00247	0.00172	0.00391
LOC728796	1	3	rs360098	224133313	0.00332	0.0899	0.00192	0.0835	0.00186
ACBD3	1	3	rs10915955	224429778	0.0322	0.0399	0.00128	0.0234	0.00256
LIN9	1	4	rs12133895	224524658	0.00369	0.664	0.00189	0.0329	0.00238
PARP1	1	15	rs1136410	224621925	7.88e-14	0.0254	0.00819	3.06e-05	0.0059
LOC391169	1	1	rs12402021	224749874	7.84e-13	7.84e-13	0.00761	6.43e-06	0.00666
C1orf95	1	17	rs655682	224827397	3.37e-09	0.0196	0.0055	0.000691	0.00436
ITPKB	1	12	rs3768411	224978819	9.36e-09	0.000198	0.00525	4.23e-05	0.00574
PSEN2	1	5	rs6426554	225149068	1.21e-14	0.00172	0.00869	2.68e-06	0.0071
CABC1	1	6	rs1892490	225216889	2.71e-07	0.00139	0.00439	7.91e-05	0.00544
CDC42BPA	1	52	rs4263966	225270265	2.35e-13	0.00163	0.00797	2.36e-06	0.00717
ZNF678	1	7	rs16847991	225857719	0.000295	0.019	0.00263	0.00488	0.00346
JMJD4	1	1	rs2273936	225987548	0.0311	0.0311	0.00131	0.0489	0.00218
C1orf142	1	8	rs10916203	226016235	0.00142	0.0624	0.00215	0.00367	0.00352
MPN2	1	3	rs1582114	226082993	1.33e-09	0.000534	0.00575	6.28e-06	0.00668
WNT9A	1	2	rs2796055	226185557	0.000131	0.0126	0.00278	0.0131	0.00286
WNT3A	1	1	rs766972	226311447	0.0374	0.0374	0.00124	0.338	0.00103
ARF1	1	2	rs3738681	226343758	0.00498	0.0078	0.00181	0.0944	0.00179
OBSCN	1	18	rs533738	226525596	0.000354	0.121	0.00252	0.206	0.00134
TRIM11	1	1	rs474600	226652460	5.79e-05	5.79e-05	0.003	0.0174	0.00271
RHOU	1	4	rs6426514	226946738	1.48e-08	0.00309	0.00513	0.000196	0.00499
RAB4A	1	5	rs237756	227486044	1.62e-06	0.000269	0.00393	0.0209	0.00262
SPHAR	1	1	rs2069372	227506813	0.000269	0.000269	0.00259	0.108	0.00171
C1orf96	1	6	rs9435840	227528505	2.32e-05	0.0612	0.00324	0.00269	0.00368
NUP133	1	11	rs16849836	227681085	4.48e-10	4.63e-07	0.00602	0.000379	0.00467
ABCB10	1	1	rs10916508	227726414	3.97e-09	3.97e-09	0.00546	0.0177	0.00271
TAF5L	1	4	rs10916526	227806119	0.156	0.474	0.00081	0.1	0.00177
KIAA0133	1	5	rs7521953	227856671	0.0377	0.376	0.00123	0.000911	0.00423
LOC100129238	1	6	rs10779848	228203609	0.0011	0.16	0.00222	0.297	0.00111
GALNT2	1	52	rs11122383	228339548	4.42e-06	0.127	0.00367	0.000187	0.00501
PGBD5	1	12	rs7523232	228529471	3.1e-09	0.00936	0.00553	0.000368	0.00468
COG2	1	9	rs1467670	228884482	9.73e-09	0.00146	0.00524	1.42e-09	0.01067
AGT	1	4	rs11122577	228914179	7.11e-07	0.0111	0.00414	0.00274	0.00367
CAPN9	1	11	rs4847017	228972346	7.28e-15	1.04e-07	0.00894	3.95e-05	0.00586
C1orf198	1	6	rs1202570	229058757	0.000276	0.135	0.00258	0.00527	0.00334
TTC13	1	19	rs17734675	229136864	3.22e-09	0.00798	0.00552	1.31e-05	0.00631
ARV1	1	2	rs10864648	229192795	2.36e-10	0.00129	0.00618	1.15e-07	0.00859
FAM89A	1	2	rs4543780	229241054	0.0106	0.0727	0.0016	0.103	0.00174
TRIM67	1	9	rs9431947	229368979	0.00675	0.291	0.00172	0.012	0.00291
C1orf131	1	6	rs16854007	229426554	1.06e-05	0.0978	0.00344	0.000474	0.00455
GNPAT	1	3	rs3767761	229460142	9.73e-07	1.08e-06	0.00406	0.000728	0.00434
EGLN1	1	7	rs516651	229609279	1.08e-17	0.013	0.01042	5.56e-08	0.00895
TSNAX	1	2	rs17802224	229750870	5.94e-09	7.89e-05	0.00536	0.000247	0.00488
DISC1	1	78	rs821645	230217114	5.57e-14	0.0174	0.00827	4.25e-11	0.01232
SIPA1L2	1	43	rs12142629	230664610	3.74e-10	1.94e-06	0.00606	0.000255	0.00486
LOC729336	1	23	rs2251548	230776331	2.31e-07	0.0612	0.00443	0.000866	0.00425
KIAA1383	1	2	rs12048236	231008874	0.0207	0.709	0.00141	0.0105	0.00298
C1orf57	1	2	rs12030659	231164585	0.171	0.563	0.00078	0.813	0.00036
PCNXL2	1	46	rs17749862	231327812	5.57e-16	0.00169	0.00942	1.9e-09	0.01053
KIAA1804	1	17	rs1402815	231582036	1.42e-09	0.00336	0.00575	0.0209	0.00263
KCNK1	1	13	rs4649343	231842102	0.000138	0.0156	0.00277	0.0538	0.00211
SLC35F3	1	74	rs12568509	232123846	2.39e-12	0.000353	0.00735	2.78e-05	0.00595
LOC100130965	1	5	rs3001707	232548301	5.3e-09	0.000592	0.00543	0.0002	0.00499
LOC440733	1	4	rs6671513	232578792	2.38e-06	0.00707	0.00383	7.94e-05	0.00543
C1orf31	1	4	rs6671513	232578792	2.38e-06	0.00707	0.00383	7.94e-05	0.00543
TARBP1	1	13	rs10910436	232633924	6.34e-21	2.98e-05	0.01225	4.18e-12	0.0134
TOMM20	1	1	rs7930	233339817	0.0794	0.0794	0.00102	0.00791	0.00313
ARID4B	1	14	rs10489690	233426502	0.0411	0.136	0.00121	0.0046	0.00341
GGPS1	1	1	rs10925482	233565886	0.091	0.091	0.00097	0.198	0.00136
TBCE	1	5	rs17543709	233631547	4.71e-05	0.174	0.00305	0.0623	0.00203
B3GALNT2	1	4	rs291344	233730483	0.0699	0.513	0.00105	0.103	0.00175
GNG4	1	14	rs508208	233794439	5.97e-24	0.000503	0.01426	6.39e-11	0.01229
LYST	1	11	rs3768051	233926337	0.000959	0.531	0.00225	0.0281	0.00246
NID1	1	13	rs3213190	234207797	1.23e-07	0.00979	0.00459	4.2e-05	0.00575
GPR137B	1	6	rs17563158	234406701	1.24e-07	0.00403	0.00459	0.00509	0.00335
ERO1LB	1	15	rs1749563	234484302	0.00192	0.0888	0.00207	0.0384	0.00229
EDARADD	1	18	rs1999506	234629910	1.53e-05	0.0972	0.00335	0.0279	0.00247
LGALS8	1	7	rs1041939	234778241	4.08e-13	2.64e-11	0.00791	3.42e-05	0.00593
HEATR1	1	17	rs751589	234790732	4.9e-12	1.76e-06	0.00715	9.96e-07	0.00755
ACTN2	1	14	rs1366989	234948407	4.77e-13	6.76e-06	0.00774	2.63e-08	0.00929
MTR	1	22	rs10495386	235099431	6.06e-11	0.00934	0.00656	5.31e-06	0.00678
LOC440737	1	9	rs1252131	235199496	2.07e-12	0.000339	0.0075	2.8e-08	0.00939
RYR2	1	136	rs2893583	235683176	1.5e-17	0.00016	0.01034	3.12e-12	0.01356
ZP4	1	3	rs2298100	236114948	0.00397	0.0657	0.00187	0.0376	0.0023
CHRM3	1	48	rs10802810	238115248	8.43e-07	0.0176	0.0041	7.32e-05	0.00547
LOC645884	1	7	rs16839314	238240106	6.85e-06	0.00184	0.00356	0.026	0.0025
FMN2	1	70	rs16840114	238692054	1.84e-15	0.00341	0.00913	6.08e-09	0.00998
GREM2	1	20	rs3748538	238760625	3.33e-15	0.00068	0.00899	3.37e-08	0.00917
RGS7	1	94	rs1970533	239024094	8.27e-21	0.00197	0.01237	3.98e-13	0.01469
FH	1	3	rs12563264	239740956	3.54e-12	2.37e-10	0.00725	5.95e-08	0.00891
KMO	1	17	rs1582096	239807393	7.44e-13	9.6e-05	0.00768	1.68e-08	0.00956
OPN3	1	7	rs3819981	239866947	1.87e-12	9.76e-06	0.00741	1.48e-06	0.00738
WDR64	1	19	rs12737686	239951352	0.000165	0.0463	0.00277	0.0553	0.00213
LOC100133057	1	25	rs10802996	240077250	9.16e-06	0.101	0.00356	0.00137	0.00413
EXO1	1	8	rs2526697	240106752	0.0235	0.0725	0.00137	0.42	0.00088
PLD5	1	89	rs316901	240477737	7.79e-12	0.00593	0.00704	7.44e-07	0.00769
CEP170	1	2	rs2171972	241450284	7.41e-11	0.822	0.00649	1.32e-07	0.00855
SDCCAG8	1	20	rs3006917	241708594	5.83e-11	0.000676	0.00654	1.1e-06	0.00753
AKT3	1	15	rs884808	241720062	6.59e-10	0.000699	0.00592	8.09e-05	0.00543
C1orf100	1	12	rs12401743	242593447	1.7e-06	0.0338	0.00391	0.00372	0.00351
ADSS	1	4	rs3101468	242644181	3.89e-06	0.103	0.00373	0.0399	0.00229
C1orf101	1	23	rs3003303	242717786	3.43e-19	2.2e-08	0.01126	3.58e-09	0.01023
FAM152A	1	5	rs12057937	242928833	1.36e-06	0.00134	0.00397	0.000377	0.00466
LOC100129656	1	1	rs9725312	243105441	1.93e-08	1.93e-08	0.00508	9.28e-05	0.00538
EFCAB2	1	20	rs4658683	243223134	4.69e-17	0.00023	0.01004	1.77e-07	0.00838
KIF26B	1	81	rs1010509	243397004	6.02e-15	0.0201	0.00884	6.58e-08	0.00887
SMYD3	1	98	rs2153409	244062543	5.16e-13	0.0244	0.00772	0.00324	0.00359
TFB2M	1	7	rs10802426	244781819	2.32e-05	0.0452	0.00324	0.58	0.00065
C1orf71	1	5	rs4130648	244896239	2.83e-08	0.361	0.00496	0.00498	0.00336
SCCPDH	1	3	rs7526237	244964757	0.00376	0.00832	0.0019	0.0325	0.00241
LOC100130097	1	4	rs3795465	245006479	0.000413	0.385	0.00248	0.055	0.00209
AHCTF1	1	6	rs1892116	245146945	0.00507	0.0695	0.0018	0.00796	0.00312
ZNF695	1	1	rs2642956	245233366	0.736	0.736	0.00024	0.931	0.00019
ZNF670	1	5	rs10802462	245270280	0.000637	0.256	0.00237	0.0293	0.00244
ZNF124	1	2	rs11806327	245387491	6.08e-14	2.51e-06	0.00826	1.41e-07	0.00849
ZNF496	1	8	rs6692645	245553044	6.97e-16	0.0113	0.00939	3.98e-09	0.0102
NLRP3	1	3	rs10754555	245651266	7.77e-06	0.0354	0.00353	0.00477	0.00339
OR2B11	1	1	rs4925663	245681240	0.000354	0.000354	0.00252	0.0676	0.00198
OR2C3	1	1	rs12563814	245763480	0.0139	0.0139	0.00153	0.154	0.00152
C1orf150	1	2	rs3844081	245790293	4.73e-07	0.473	0.00424	5.26e-05	0.00563
OR6F1	1	1	rs2282316	245942038	0.00201	0.00201	0.00206	0.00723	0.00318
OR11L1	1	1	rs6667389	246071237	4.27e-08	4.27e-08	0.00486	0.000381	0.00466
TRIM58	1	4	rs3811445	246106336	0.165	0.492	0.00079	0.808	0.00037
OR2AK2	1	1	rs6664332	246195552	1.67e-10	1.67e-10	0.00627	2.38e-05	0.00603
OR2L13	1	10	rs11803988	246253723	1.51e-13	1.67e-10	0.00803	3.35e-07	0.00807
OR2L2	1	1	rs6658141	246268967	2.93e-13	2.93e-13	0.00786	7.39e-07	0.0077
OR2T6	1	1	rs954474	246618183	0.171	0.171	0.00078	0.361	0.00099
SH3BP5L	1	2	rs4926509	247082090	0.0201	0.249	0.00141	0.365	0.00098
LOC727776	1	1	rs11205415	247087307	0.117	0.117	0.0009	0.0367	0.00232
LOC727818	2	1	rs437853	186973	3.37e-09	3.37e-09	0.0055	0.00204	0.00382
SH3YL1	2	14	rs17713729	239092	9.55e-12	1.89e-06	0.00703	1.55e-05	0.00628
ACP1	2	3	rs6855	267995	5.11e-12	6.35e-07	0.00717	3.16e-05	0.00591
FAM150B	2	4	rs7605824	270819	7.48e-11	3.21e-09	0.00647	2.29e-05	0.00604
SNTG2	2	35	rs10192365	1213866	2.63e-15	0.00238	0.00904	2.69e-08	0.00928
LOC100132833	2	9	rs10196789	1296349	3.78e-12	4.49e-05	0.00722	2.3e-05	0.00604
TPO	2	12	rs13424221	1410806	8.15e-06	0.0752	0.00356	0.0178	0.00274
PXDN	2	13	rs2241455	1646274	4.58e-05	0.0152	0.00306	0.0495	0.00215
MYT1L	2	64	rs1897477	1993140	1.19e-16	0.0142	0.00985	2.23e-09	0.0105
LOC100132738	2	1	rs6750358	3140634	0.0213	0.0213	0.0014	0.718	0.00047
TSSC1	2	32	rs7563810	3301177	4.5e-19	0.0915	0.01119	6.56e-10	0.01103
TTC15	2	10	rs10193454	3436104	7.76e-13	0.000553	0.00762	1.99e-08	0.00943
ADI1	2	2	rs4591372	3482573	0.00144	0.00606	0.00214	0.127	0.00162
COLEC11	2	9	rs11690887	3658741	6.85e-09	0.0136	0.00533	0.00188	0.00386
ALLC	2	7	rs11682163	3727421	0.00248	0.0163	0.002	0.382	0.00095
LOC728597	2	12	rs357957	3761563	7.82e-10	0.000156	0.00588	0.00672	0.00321
LOC727982	2	2	rs2619192	4678507	0.0207	0.256	0.00141	0.166	0.00147
SOX11	2	1	rs4371338	5755481	0.663	0.663	0.00029	0.399	0.00092
FLJ42418	2	4	rs6718202	6809163	0.00416	0.0601	0.0019	0.0113	0.003
LOC129607	2	1	rs4143153	6914313	0.0933	0.0933	0.00097	0.341	0.00102
RSAD2	2	1	rs10929456	6942626	0.175	0.175	0.00077	0.186	0.0014
RNF144A	2	45	rs771312	7005233	2.16e-10	0.0149	0.00621	0.0108	0.00297
C2orf46	2	7	rs10210006	8383937	8.31e-11	1.51e-06	0.00648	0.000528	0.00451
ID2	2	1	rs2306067	8741004	2.26e-05	2.26e-05	0.00325	0.0197	0.00265
KIDINS220	2	8	rs4669342	8886008	0.00238	0.125	0.00209	0.0104	0.00311
MBOAT2	2	5	rs7588402	9012518	1.79e-12	1.54e-08	0.0074	3.23e-06	0.00699
DDEF2	2	24	rs4668615	9341493	2.64e-09	7.29e-05	0.00557	4.18e-06	0.00686
ITGB1BP1	2	2	rs10929580	9464814	0.12	0.122	0.00089	0.149	0.00153
CPSF3	2	3	rs10209595	9491117	0.0373	0.22	0.00124	0.195	0.00137
IAH1	2	6	rs17524425	9543455	0.0099	0.353	0.00161	0.31	0.00108
ADAM17	2	7	rs10929587	9580271	0.0348	0.283	0.00128	0.0442	0.00224
YWHAQ	2	8	rs7608161	9668060	1.07e-09	0.0313	0.0058	2.17e-05	0.00607
TAF1B	2	15	rs4669470	9911541	1.32e-06	0.0153	0.00398	0.00147	0.00398
GRHL1	2	10	rs891500	10054666	3.9e-10	0.00033	0.00605	0.0046	0.0034
KLF11	2	4	rs4669522	10111643	3.9e-06	0.000227	0.0037	8.1e-05	0.00542
CYS1	2	1	rs12622986	10136397	0.0108	0.0108	0.0016	0.256	0.00121
C2orf48	2	13	rs13389178	10219068	9.47e-07	0.0186	0.00407	0.0164	0.00274
HPCAL1	2	20	rs7594864	10454767	2.46e-16	0.00802	0.00963	9.68e-08	0.00867
ODC1	2	2	rs2357550	10500241	0.0146	0.036	0.00151	0.0465	0.00219
NOL10	2	20	rs12692412	10637505	1.06e-13	4.36e-05	0.00812	1.53e-09	0.01063
LOC100130910	2	2	rs6757005	10828302	5.2e-08	0.169	0.00481	0.000436	0.00459
ATP6V1C2	2	8	rs6757005	10828302	5.2e-08	0.146	0.00481	0.000436	0.00459
PDIA6	2	25	rs1734340	10853543	1.67e-14	1.84e-12	0.00857	7.62e-08	0.00878
C2orf50	2	4	rs11903207	11203541	1.82e-07	4.76e-07	0.00449	0.00209	0.00381
PQLC3	2	1	rs6432182	11218320	0.0024	0.0024	0.002	0.00366	0.00352
ROCK2	2	11	rs2290156	11250659	5.25e-05	0.0156	0.00303	0.0058	0.00329
E2F6	2	1	rs6709507	11518655	0.00599	0.00599	0.00177	0.00452	0.00343
GREB1	2	18	rs4669749	11610115	8.4e-07	0.0754	0.0041	0.0473	0.00218
NTSR2	2	1	rs4669767	11726315	0.0295	0.0295	0.00131	0.0447	0.00221
LPIN1	2	10	rs2358042	11830889	0.00034	0.0251	0.00256	0.0118	0.00295
LOC729285	2	4	rs10193112	11921110	8.46e-09	0.152	0.00529	0.000565	0.00448
TRIB2	2	5	rs890069	12784955	4.71e-06	0.000649	0.00365	0.000112	0.00526
NAG	2	55	rs2287269	15567831	1.43e-15	0.00554	0.0092	1.55e-07	0.00845
DDX1	2	4	rs4668942	15667894	0.017	0.0398	0.00146	0.0944	0.00179
FAM49A	2	23	rs12052781	16672451	2.42e-17	0.00071	0.0102	1e-08	0.00974
VSNL1	2	23	rs6751113	17697933	1.19e-15	1.34e-05	0.00924	7.79e-14	0.01526
SMC6	2	4	rs16983782	17751531	1.04e-07	5.93e-07	0.00464	3.06e-07	0.00812
GEN1	2	5	rs300174	17817041	1.18e-05	0.0423	0.00343	1.87e-05	0.00615
KCNS3	2	5	rs3747516	17976989	3.17e-05	0.0212	0.00316	0.00696	0.00319
NT5C1B	2	1	rs7594728	18624271	0.231	0.231	0.00068	0.389	0.00094
FLJ41481	2	7	rs17705058	19089368	0.00502	0.045	0.0018	0.0413	0.00225
TTC32	2	1	rs16987218	19961689	0.0376	0.0376	0.00123	0.788	0.00039
WDR35	2	3	rs1381817	20042701	4.12e-08	0.0224	0.00487	4.75e-06	0.0068
MATN3	2	2	rs10495701	20061332	9.65e-08	0.0269	0.00465	8.95e-06	0.0065
LAPTM4A	2	4	rs34539547	20099786	4.7e-21	0.000346	0.01233	3.43e-07	0.00807
SDC1	2	1	rs4666298	20284213	3.86e-21	3.86e-21	0.01237	2.11e-05	0.00608
PUM2	2	5	rs7589798	20342651	3.26e-21	0.000711	0.01241	4.1e-06	0.00687
HS1BP3	2	4	rs3796064	20701799	2.16e-17	0.0735	0.01023	8.23e-09	0.00984
C2orf43	2	7	rs1595328	20772248	6.41e-23	1.95e-05	0.0134	2.95e-10	0.01143
APOB	2	5	rs1469513	21113067	0.000279	0.00594	0.00258	0.0286	0.00245
LOC100129278	2	1	rs312961	21202704	0.0288	0.0288	0.00131	0.268	0.00117
LOC645949	2	9	rs7573869	21796630	1.84e-07	0.000784	0.00449	6.91e-05	0.0055
KLHL29	2	67	rs1465677	23559181	3.19e-13	0.000233	0.00784	1.24e-06	0.00745
ATAD2B	2	13	rs2551329	23838496	1.38e-15	6.95e-07	0.0092	3.11e-10	0.01138
UBXD4	2	4	rs4643489	24068899	6.72e-07	0.000694	0.00433	0.0129	0.003
C2orf44	2	1	rs10153678	24121646	0.14	0.14	0.00084	0.381	0.00095
SF3B14	2	1	rs6728930	24145857	0.148	0.148	0.00085	0.263	0.00122
PFN4	2	2	rs2303289	24195746	9.75e-05	0.0381	0.00286	0.0787	0.0019
LOC375190	2	8	rs10211356	24239716	2.94e-10	0.000192	0.00612	1.87e-07	0.00835
FLJ30851	2	3	rs11692176	24257726	1.17e-10	7.12e-10	0.00636	6.67e-08	0.00884
ITSN2	2	18	rs17789375	24356058	2.95e-12	3.61e-06	0.00728	3.23e-05	0.00587
NCOA1	2	15	rs6545698	24812765	2.32e-07	0.0213	0.00446	0.0793	0.00191
CENPO	2	4	rs11125797	24891130	6.68e-06	0.23	0.00356	0.046	0.00219
ADCY3	2	10	rs10198275	24984046	1.12e-14	7.17e-13	0.00867	1.15e-06	0.00748
RBJ	2	2	rs10432684	25035697	0.0293	0.0327	0.00131	0.338	0.00103
LOC729723	2	12	rs4665761	25097551	0.000734	0.00618	0.00234	0.0394	0.00228
EFR3B	2	11	rs551573	25159008	1.51e-18	9.91e-05	0.0109	7.09e-10	0.011
POMC	2	4	rs934778	25242728	1.04e-07	0.0011	0.0047	1.96e-05	0.00618
LOC729734	2	2	rs4665287	25266813	0.0155	0.0588	0.00149	0.03	0.00243
DNMT3A	2	7	rs1465825	25331957	1.62e-08	0.0767	0.00511	6.63e-05	0.00552
DTNB	2	22	rs7558082	25466318	4.21e-12	0.0223	0.00721	9.93e-05	0.00533
ASXL2	2	12	rs17680828	25844144	8.64e-13	1.25e-06	0.00766	6.12e-08	0.00896
KIF3C	2	4	rs13399065	26044254	7.11e-07	2.11e-05	0.00414	0.000563	0.00447
LOC391358	2	1	rs4665809	26104865	0.000134	0.000134	0.00278	0.00047	0.00456
RAB10	2	5	rs1560868	26134963	9.95e-06	0.000123	0.00357	0.000292	0.0049
HADHA	2	5	rs17593512	26271333	0.00344	0.0333	0.00191	0.00231	0.00376
GPR113	2	7	rs12471849	26413329	0.00021	0.0174	0.00266	0.103	0.00175
SELI	2	5	rs11899781	26433641	6.31e-06	0.0401	0.00358	0.0113	0.00295
C2orf39	2	5	rs17529722	26488946	0.000387	0.168	0.0025	0.277	0.00115
OTOF	2	16	rs11126565	26618359	9.66e-12	0.0149	0.00698	8.67e-08	0.00872
LOC339778	2	3	rs939815	26644958	0.0422	0.198	0.0012	0.106	0.00173
CIB4	2	11	rs1554903	26663110	0.00013	0.0199	0.00279	0.00145	0.00401
KCNK3	2	4	rs11126666	26782315	4.09e-05	0.0189	0.00309	0.000549	0.00448
CENPA	2	2	rs11692834	26869855	2.05e-05	2.93e-05	0.00327	2.15e-05	0.00607
DPYSL5	2	5	rs12618836	26991120	2.47e-05	0.00169	0.00328	0.0338	0.0024
MAPRE3	2	5	rs11897106	27049803	3.68e-05	8.85e-05	0.00312	0.0873	0.00184
AGBL5	2	1	rs2278593	27132517	0.000372	0.000372	0.00251	0.00733	0.00316
ABHD1	2	1	rs2304678	27207011	0.0115	0.0115	0.00158	0.155	0.00151
PREB	2	1	rs2289358	27209495	0.0167	0.0167	0.00147	0.188	0.00139
SLC5A6	2	3	rs1275532	27286566	0.00224	0.01	0.00202	0.0018	0.00388
C2orf28	2	1	rs7437	27293255	0.4	0.4	0.00049	0.345	0.00102
CAD	2	3	rs3769143	27304228	0.000388	0.0141	0.00249	0.029	0.00244
SLC30A3	2	1	rs11126936	27336605	0.000751	0.000751	0.00232	0.0613	0.00204
TRIM54	2	2	rs13404327	27372657	7.41e-05	0.000146	0.00293	0.0308	0.00241
MPV17	2	1	rs4665965	27389884	0.000137	0.000137	0.00277	0.023	0.00257
GTF3C2	2	1	rs4665969	27428457	5.27e-14	5.27e-14	0.00833	0.000638	0.00442
IFT172	2	1	rs7583698	27565912	0.849	0.849	0.00017	0.98	0.0001
GCKR	2	3	rs780094	27594741	5.96e-19	9.1e-12	0.01113	8.96e-07	0.0076
ZNF512	2	4	rs2068834	27693043	1.63e-08	0.000225	0.0051	0.00439	0.00343
XAB1	2	3	rs6547740	27707873	0.000922	0.00503	0.00227	0.747	0.00044
SUPT7L	2	1	rs17706100	27730170	0.00287	0.00287	0.00196	0.0203	0.00263
MRPL33	2	3	rs3736594	27849285	5.57e-08	7.15e-08	0.00481	0.00013	0.00521
RBKS	2	5	rs4666014	27872679	1.17e-05	7.25e-05	0.00347	0.00383	0.00354
BRE	2	42	rs1546029	28396438	1.08e-14	3.51e-05	0.00869	3.49e-07	0.00805
PLB1	2	29	rs4666092	28627275	7.26e-09	0.0051	0.00531	0.000125	0.00521
PPP1CB	2	3	rs10191120	28851440	9.28e-06	0.000395	0.00348	0.0592	0.00205
SPDYA	2	2	rs6725033	28908890	1.75e-05	0.0503	0.00332	0.0508	0.00214
WDR43	2	8	rs6547889	28981826	2.22e-06	0.08	0.00385	0.038	0.0023
LOC165186	2	13	rs6756951	29113610	2.16e-13	0.00113	0.00793	2.23e-07	0.00827
FLJ34931	2	2	rs17744052	29142915	2.33e-12	6.51e-10	0.00734	6.49e-08	0.00886
CLIP4	2	10	rs3099560	29210985	2.32e-13	0.0232	0.00799	0.000165	0.00513
ALK	2	143	rs11885445	29292159	1.34e-11	0.00286	0.0069	0.000216	0.00494
YPEL5	2	2	rs3768669	30233841	0.00612	0.00647	0.00175	0.0309	0.00241
LBH	2	3	rs11676884	30319570	0.122	0.131	0.00088	0.0192	0.00266
LYCAT	2	43	rs829584	30530779	2.79e-08	0.00131	0.00497	5.6e-05	0.00561
CAPN13	2	37	rs1879283	30827329	3.26e-08	0.00777	0.00493	0.00137	0.00402
GALNT14	2	47	rs12465448	31075850	3.07e-10	0.00918	0.00611	5.19e-06	0.00676
LOC100129588	2	1	rs9308917	31247753	0.0285	0.0285	0.00132	0.0749	0.00193
CAPN14	2	24	rs4952070	31307895	1.85e-13	0.0899	0.00798	5.89e-05	0.00559
EHD3	2	2	rs611076	31328407	3.92e-05	0.0835	0.0031	0.00283	0.00365
XDH	2	13	rs206856	31470924	1.13e-05	0.0425	0.00343	0.00121	0.00409
SRD5A2	2	6	rs12467911	31636295	1.21e-07	0.000169	0.00466	0.00114	0.00416
MEMO1	2	3	rs11901415	31987454	0.000275	0.00148	0.0026	0.0255	0.00252
SPAST	2	4	rs13022197	32196671	4.33e-19	5.03e-14	0.01134	1.37e-10	0.0119
SLC30A6	2	3	rs17011863	32261178	0.00306	0.0168	0.00194	0.133	0.0016
NLRC4	2	4	rs479333	32342662	6.98e-18	4.26e-11	0.01075	1.17e-09	0.01102
YIPF4	2	1	rs4952258	32362834	0.00016	0.00016	0.00273	0.00192	0.00385
BIRC6	2	8	rs2069213	32596588	2.87e-13	2.02e-05	0.00787	1.17e-07	0.00858
TTC27	2	22	rs1031261	32719025	1.41e-09	0.00943	0.00573	3.2e-07	0.0081
LTBP1	2	72	rs817537	33322827	2.08e-18	0.00037	0.01081	1.59e-07	0.00843
RASGRP3	2	27	rs41332550	33601529	3e-10	0.00619	0.00613	7.34e-06	0.0066
FAM98A	2	3	rs6708570	33668888	0.0258	0.039	0.00135	0.0295	0.00244
CRIM1	2	57	rs3770923	36485456	1.78e-10	0.0315	0.00633	0.0166	0.00277
LOC100130212	2	1	rs10189344	36632391	6.28e-06	6.28e-06	0.00358	0.0015	0.00398
FEZ2	2	13	rs1179494	36663000	1.1e-05	0.00067	0.00343	0.000237	0.00489
VIT	2	36	rs6717705	36780051	4.83e-13	7.05e-05	0.00773	5.2e-08	0.00896
STRN	2	7	rs3770770	37046370	0.00898	0.101	0.00164	0.208	0.00133
HEATR5B	2	9	rs10490656	37085212	1.69e-10	0.00284	0.00626	4.18e-07	0.00797
CCDC75	2	1	rs12474977	37176964	0.798	0.798	0.0002	0.163	0.00148
EIF2AK2	2	3	rs4648196	37217472	0.001	0.00244	0.00224	0.00259	0.00371
SULT6B1	2	3	rs13022271	37266746	6.13e-06	0.00464	0.00359	0.00616	0.00326
C2orf56	2	2	rs2372888	37313738	3.85e-07	0.0164	0.0043	0.00244	0.00373
PRKD3	2	18	rs11124574	37352793	2.3e-16	0.00371	0.00965	2.13e-11	0.01265
QPCT	2	1	rs2373000	37446132	0.00169	0.00169	0.0021	0.0211	0.00261
CDC42EP3	2	6	rs4670749	37742931	0.00197	0.0213	0.00208	0.0601	0.00207
FAM82A	2	16	rs41383748	38092514	3.82e-13	0.248	0.00781	0.00124	0.00408
CYP1B1	2	1	rs2551188	38156298	2.3e-05	2.3e-05	0.00324	0.000207	0.00496
ARL6IP2	2	4	rs4589732	38409334	0.000507	0.186	0.00245	0.207	0.00135
RPLP0-like	2	2	rs17022789	38555841	0.00306	0.00995	0.00194	0.0125	0.00289
HNRPLL	2	7	rs969876	38654751	4.84e-05	0.0654	0.00309	0.0256	0.00255
GALM	2	10	rs4670264	38767388	2.53e-07	0.00161	0.00441	0.000915	0.00422
GEMIN6	2	1	rs1562855	38861972	0.00141	0.00141	0.00216	0.000141	0.00518
DHX57	2	6	rs3099945	38954264	7.53e-05	0.0906	0.00293	0.00184	0.00387
LOC729967	2	4	rs986019	38994618	1.28e-06	0.0803	0.00403	0.0112	0.00297
SOS1	2	7	rs10204958	39096207	1.84e-10	5.93e-07	0.00625	4.87e-05	0.00568
CDKL4	2	5	rs7595102	39264165	1.41e-07	0.000102	0.00455	0.0103	0.00299
MAP4K3	2	21	rs17508058	39455393	2.91e-08	0.000582	0.00496	4.87e-05	0.00567
LOC728730	2	21	rs4670949	39676487	4.79e-15	0.0275	0.00889	5.25e-05	0.00563
TMEM178	2	5	rs2540250	39758810	2.5e-08	1.46e-07	0.00505	0.00738	0.00319
THUMPD2	2	2	rs997976	39842859	0.116	0.133	0.0009	0.0135	0.00285
LOC100128590	2	85	rs1157960	40142550	2.33e-10	0.00769	0.0063	1.9e-06	0.00739
SLC8A1	2	89	rs434082	40338578	5.43e-11	0.00231	0.00655	4.7e-05	0.0057
LDHAL3	2	6	rs4563281	41915639	3.09e-07	1.08e-05	0.00435	1.75e-05	0.00617
LOC400950	2	1	rs7598275	42030301	3.62e-09	3.62e-09	0.00549	0.00174	0.0039
LOC91461	2	1	rs2289410	42137614	1.38e-10	1.38e-10	0.00631	1.13e-06	0.00749
EML4	2	15	rs17029408	42332554	4.29e-06	0.416	0.00368	0.057	0.00207
KCNG3	2	6	rs1979755	42561909	2.04e-09	0.0582	0.00564	9.42e-06	0.00647
MTA3	2	8	rs2272447	42724479	0.000197	0.00647	0.00268	0.0125	0.00289
HAAO	2	4	rs3816183	42869223	3.82e-07	1.69e-06	0.0043	0.00041	0.00462
THADA	2	53	rs10165527	43636372	1.37e-06	0.168	0.00398	0.0014	0.00402
PLEKHH2	2	26	rs2888881	43792583	3.2e-11	2.28e-05	0.0067	6.67e-07	0.00778
DYNC2LI1	2	3	rs4953017	43877786	0.00197	0.0274	0.00209	0.00651	0.00326
ABCG5	2	4	rs2278356	43893379	0.00723	0.339	0.0017	0.00423	0.00345
ABCG8	2	4	rs6748810	43924439	0.000168	0.0252	0.00272	0.0077	0.00314
LRPPRC	2	12	rs12989909	44071048	7.42e-12	6.89e-06	0.00705	4.91e-09	0.01009
PPM1B	2	3	rs7595470	44255971	0.0334	0.0378	0.00127	0.0794	0.00189
SLC3A1	2	10	rs3738985	44356292	0.00179	0.0111	0.00208	0.139	0.00157
PREPL	2	10	rs11124988	44401786	6.63e-05	0.0176	0.00296	0.00746	0.00316
C2orf34	2	63	rs1067402	44529730	4.06e-05	0.0594	0.0031	0.00212	0.0038
LOC100130502	2	4	rs519799	45003685	4.34e-14	0.0899	0.00833	2.81e-06	0.00705
SIX2	2	2	rs2290030	45086190	1.07e-05	0.435	0.00345	0.0152	0.00279
SRBD1	2	35	rs17033598	45477316	4.22e-09	0.0055	0.00551	1.41e-06	0.00745
PRKCE	2	125	rs4953262	45894297	3.1e-14	0.00434	0.00842	7.78e-05	0.00545
EPAS1	2	21	rs3088359	46455755	6.77e-20	0.00154	0.01166	8.29e-12	0.01308
LOC388946	2	6	rs11125078	46547467	2.49e-06	0.631	0.00382	0.00129	0.00405
ATP6V1E2	2	1	rs3814045	46592661	0.0888	0.0888	0.00098	0.167	0.00146
RHOQ	2	2	rs17035272	46645865	5.53e-07	7.1e-05	0.00422	0.00145	0.004
PIGF	2	5	rs3768723	46674572	3.69e-08	0.00702	0.00494	0.0686	0.00199
CRIPT	2	1	rs3087822	46705537	0.936	0.936	0.0001	0.952	0.00016
LOC100130429	2	1	rs7575099	46733103	0.0205	0.0205	0.00141	0.0401	0.00227
LOC730078	2	3	rs2346877	46746462	1.12e-05	0.00079	0.00343	0.0094	0.00304
SOCS5	2	9	rs17823065	46841577	3.18e-29	5.37e-05	0.01697	4.45e-14	0.01553
LOC388948	2	1	rs2289929	46897722	0.0419	0.0419	0.0012	0.294	0.00112
MCFD2	2	1	rs2289927	46988750	0.00562	0.00562	0.00177	1.57e-05	0.00622
TTC7A	2	22	rs2033533	47031291	3.77e-12	0.0391	0.00722	3.27e-07	0.00809
LOC100129286	2	11	rs13382303	47174350	3.12e-10	0.00366	0.00612	2.54e-06	0.00712
C2orf61	2	5	rs815807	47234749	2.6e-08	0.000312	0.00499	0.000478	0.00455
CALM2	2	1	rs10153674	47254462	1.07e-07	1.07e-07	0.00475	0.00119	0.00418
MSH2	2	5	rs2347794	47510305	0.000551	0.00705	0.0024	0.0431	0.00223
KCNK12	2	6	rs748780	47617399	1.38e-05	0.0161	0.00337	0.0013	0.00405
LOC285053	2	1	rs17038387	47771558	0.000735	0.000735	0.00233	0.0138	0.00284
MSH6	2	3	rs1800932	47871585	0.123	0.13	0.00089	0.522	0.00073
FBXO11	2	7	rs10495947	47938066	0.0002	0.00139	0.00267	0.00814	0.00311
FOXN2	2	8	rs6718068	48458482	1.47e-10	2.31e-06	0.00632	7.07e-05	0.00551
CCDC128	2	6	rs11690526	48592736	3.86e-11	2.48e-05	0.00667	2.59e-06	0.00713
STON1	2	3	rs10865231	48675445	3.01e-06	3.07e-06	0.00377	2.33e-06	0.00716
STON1-GTF2A1L	2	13	rs17037472	48702019	7.37e-11	0.00134	0.00651	0.000621	0.00443
LHCGR	2	12	rs10495959	48813041	6.37e-11	0.0908	0.00651	2.11e-09	0.01048
GTF2A1L	2	21	rs10495959	48813041	6.37e-11	0.0163	0.00651	2.11e-09	0.01048
FSHR	2	53	rs4246578	49103424	3e-10	0.0165	0.00612	2.49e-05	0.006
NRXN1	2	211	rs13005521	50449360	4.15e-16	0.000552	0.00956	1.11e-07	0.00866
LOC730100	2	42	rs34888568	51157980	1.05e-08	0.0226	0.00522	0.000121	0.00523
ASB3	2	14	rs11681941	53787528	3.73e-11	0.0498	0.00665	2.45e-08	0.00932
C2orf30	2	1	rs6545367	53890789	0.00566	0.00566	0.00177	0.0211	0.00261
PSME4	2	12	rs10208649	54014867	0.000345	0.0887	0.00253	0.00907	0.00305
ACYP2	2	26	rs10186140	54216479	4.76e-07	0.02	0.00424	1.93e-05	0.00612
TSPYL6	2	2	rs843705	54335096	0.399	0.569	0.00049	0.297	0.00111
FLJ40298	2	1	rs17189869	54437046	0.136	0.136	0.00085	0.189	0.00139
SPTBN1	2	44	rs6748715	54719998	3.78e-08	0.0039	0.00489	0.000144	0.00514
FLJ42562	2	62	rs17046514	55039366	3.69e-14	0.0424	0.00839	0.00102	0.00418
RTN4	2	11	rs2580771	55069329	8.5e-05	0.000505	0.0029	0.247	0.00123
C2orf63	2	2	rs12621144	55257139	0.322	0.65	0.00057	0.641	0.00057
RPS27A	2	1	rs6545480	55314255	0.0109	0.0109	0.00159	0.0145	0.00281
MTIF2	2	2	rs2589098	55338896	0.0546	0.248	0.00113	0.532	0.00071
LOC344405	2	1	rs2966465	55364131	0.176	0.176	0.00077	0.869	0.00028
CCDC88A	2	18	rs6746983	55392201	3.53e-10	0.0249	0.00607	0.000575	0.00446
CCDC104	2	4	rs12617627	55623445	8.17e-10	0.000964	0.00586	3.18e-06	0.00699
SMEK2	2	7	rs12993624	55646980	4.16e-05	0.00268	0.00308	7.25e-06	0.0066
PNPT1	2	9	rs1822513	55756520	1.85e-11	2.07e-05	0.00682	5.61e-08	0.00893
EFEMP1	2	14	rs3791675	55964813	1.23e-06	0.0424	0.004	0.0176	0.00271
CCDC85A	2	36	rs12713315	56312013	2.41e-12	6.74e-05	0.00733	9.67e-08	0.00867
VRK2	2	5	rs848292	58238857	9.03e-06	0.00363	0.00349	0.289	0.00113
FANCL	2	9	rs848286	58248047	1.1e-05	0.0322	0.00347	0.0375	0.00233
LOC730134	2	1	rs2192563	59326564	0.000213	0.000213	0.00266	0.000676	0.00438
LOC647038	2	13	rs10490114	59425734	3.99e-07	0.00638	0.00429	0.00766	0.00314
BCL11A	2	16	rs12469024	60551791	2.2e-16	3.86e-05	0.00965	7.41e-11	0.01206
PAPOLG	2	2	rs28459296	60847942	2.01e-05	0.0294	0.00328	0.0578	0.00207
PUS10	2	6	rs9309333	61086209	0.000349	0.00615	0.00252	0.000616	0.00442
PEX13	2	3	rs1177234	61113567	0.000521	0.00149	0.00242	0.00296	0.00363
KIAA1841	2	4	rs1177264	61193954	0.00502	0.0116	0.0018	0.161	0.00149
LOC339804	2	4	rs3889717	61244295	0.0033	0.0438	0.00192	0.0484	0.00217
AHSA2	2	1	rs777585	61266063	0.181	0.181	0.00076	0.59	0.00064
USP34	2	23	rs2167565	61329962	6.6e-06	0.19	0.00357	3.05e-05	0.0059
XPO1	2	3	rs1050567	61559167	0.0743	0.0862	0.00105	0.019	0.0027
FLJ13305	2	5	rs10865327	61917908	9.37e-09	0.000205	0.00536	9.25e-05	0.00547
CCT4	2	1	rs17573253	61955419	1.33e-06	1.33e-06	0.00398	7.21e-05	0.00548
COMMD1	2	13	rs11125907	62193184	4.89e-11	0.000142	0.00659	2.4e-06	0.00714
LOC100131923	2	3	rs13018813	62264019	5.16e-13	1.62e-12	0.00772	2.34e-07	0.00825
B3GNT2	2	2	rs10518939	62294722	0.0651	0.185	0.00108	0.0592	0.00205
TMEM17	2	2	rs6713096	62583157	1.64e-08	0.00437	0.0051	4.34e-06	0.00685
LOC100129162	2	3	rs7580494	62635003	8.08e-09	0.0036	0.00529	0.000416	0.00462
EHBP1	2	15	rs1906198	62800162	2.36e-16	5.7e-12	0.00964	9.15e-11	0.01196
LOC51057	2	30	rs2677439	63350502	1.8e-10	3.2e-08	0.00625	2.71e-07	0.00818
UGP2	2	3	rs4671072	63940531	2.75e-05	0.114	0.00319	0.0147	0.0028
VPS54	2	10	rs6723613	64021653	0.000204	0.0291	0.00267	0.106	0.00173
HSPC159	2	1	rs13391620	64538167	0.0849	0.0849	0.00099	0.663	0.00054
AFTPH	2	4	rs9309362	64652042	6.03e-06	0.195	0.0036	6.87e-05	0.00551
SERTAD2	2	2	rs3770716	64718142	5.58e-11	0.00323	0.00684	0.00044	0.00484
LOC400958	2	7	rs13022034	64984429	6.4e-06	0.0055	0.00358	0.405	0.00091
SLC1A4	2	3	rs6546119	65088837	0.000294	0.014	0.00257	0.00247	0.00372
LOC729306	2	1	rs2540959	65117859	0.842	0.842	0.00017	0.906	0.00023
CEP68	2	5	rs2249105	65141400	1.67e-15	1.21e-12	0.00915	2.24e-09	0.01046
RAB1A	2	3	rs11126028	65191654	1.56e-12	2.74e-12	0.00749	3.51e-06	0.00699
LOC729317	2	1	rs6546134	65284698	0.651	0.651	0.0003	0.438	0.00085
ACTR2	2	2	rs6745303	65333698	0.000368	0.0186	0.00251	0.0551	0.00209
SPRED2	2	19	rs874952	65462029	1.09e-06	0.0197	0.00404	0.000902	0.00425
LOC100131818	2	4	rs11678836	65697567	2.1e-06	0.297	0.00389	0.000227	0.00495
LOC729348	2	2	rs6717698	66470898	0.00461	0.0811	0.00187	0.00698	0.00327
MEIS1	2	18	rs17032119	66568776	2.72e-05	0.0233	0.0032	0.108	0.00172
LOC644838	2	9	rs13004577	67257830	2.33e-05	0.00602	0.00324	0.0175	0.00272
ETAA1	2	3	rs3770657	67484484	0.000369	0.0664	0.00252	0.105	0.00175
WDR92	2	1	rs6546357	68232542	0.0306	0.0306	0.00129	0.329	0.00105
PNO1	2	2	rs10153623	68244414	2.47e-11	0.137	0.00674	1.12e-06	0.0075
PPP3R1	2	6	rs6731036	68291449	1.38e-14	0.116	0.00868	1.02e-07	0.0087
CNRIP1	2	3	rs6746740	68383186	3.99e-10	4.89e-09	0.00607	7.02e-07	0.00775
PLEK	2	15	rs17601687	68469403	5.32e-14	6.07e-05	0.00842	9.96e-07	0.00768
C2orf13	2	6	rs7604110	68643665	0.0182	0.496	0.00146	0.0746	0.00194
ARHGAP25	2	17	rs11694785	68866755	2.02e-10	0.00805	0.00622	0.000276	0.00482
BMP10	2	2	rs2312078	68948656	3.6e-09	3.24e-07	0.00549	8.04e-07	0.00766
LOC100132413	2	13	rs4525729	68999697	3.7e-10	0.0015	0.00606	3.04e-07	0.00812
GKN1	2	4	rs4417751	69055398	5.18e-09	0.0214	0.0054	8.98e-06	0.0065
ANTXR1	2	37	rs4567970	69116413	5.64e-13	0.0151	0.0077	2.71e-08	0.00928
GFPT1	2	8	rs4302256	69463608	1.45e-06	0.535	0.00396	0.000444	0.00458
NFU1	2	2	rs4581940	69509294	5.03e-07	0.688	0.00423	0.000434	0.0046
AAK1	2	15	rs7566200	69603859	5.43e-09	0.000183	0.00538	0.00079	0.0043
ANXA4	2	6	rs2290452	69901148	1.75e-14	0.0713	0.00856	2.9e-05	0.00593
GMCL1	2	3	rs17037194	69957306	8.98e-16	1.43e-15	0.00931	3.22e-06	0.00699
MXD1	2	4	rs34586537	70016820	1.59e-10	2.6e-10	0.00628	5.35e-06	0.00674
SASP	2	1	rs3796097	70042180	0.0103	0.0103	0.00161	0.0245	0.00254
C2orf42	2	1	rs11677137	70243404	0.00112	0.00112	0.00222	0.00983	0.00301
TIA1	2	2	rs2706769	70326957	4.19e-08	0.0271	0.00486	6.89e-05	0.0055
PCYOX1	2	4	rs12151768	70351328	1.83e-08	0.00664	0.00511	4.51e-05	0.00573
SNRPG	2	1	rs2862185	70363193	0.0147	0.0147	0.0015	0.862	0.00029
FAM136A	2	2	rs14234	70377646	2.59e-08	0.0159	0.00501	7.54e-05	0.00548
TGFA	2	16	rs930655	70537959	1.22e-09	0.0182	0.00576	2.85e-05	0.00593
ADD2	2	27	rs3755353	70812835	4.49e-07	0.000935	0.00426	0.00514	0.00335
FIGLA	2	2	rs6546626	70860140	0.000282	0.000979	0.00258	0.511	0.00074
CLEC4F	2	1	rs17656087	70893860	0.308	0.308	0.00058	0.444	0.00084
CD207	2	2	rs17662453	70914616	1.14e-06	0.0367	0.00405	0.000287	0.00481
VAX2	2	3	rs6748268	71006358	9.9e-05	0.0367	0.00286	0.000694	0.00436
ATP6V1B1	2	1	rs17006586	71044716	0.0849	0.0849	0.00099	0.642	0.00057
NAGK	2	4	rs999240	71151036	0.00229	0.202	0.00205	0.00279	0.00371
MPHOSPH10	2	6	rs357749	71225997	0.0016	0.0223	0.00212	0.114	0.00169
PAIP2B	2	6	rs10514625	71292673	3.73e-05	0.00806	0.00311	0.00121	0.00408
ZNF638	2	12	rs10210436	71481368	1.09e-06	0.0173	0.00428	0.00142	0.00421
DYSF	2	26	rs17007070	71647874	2.72e-10	0.000693	0.00614	1.64e-06	0.00732
CYP26B1	2	1	rs2241057	72215468	5.24e-15	5.24e-15	0.00886	1.1e-08	0.0097
EXOC6B	2	36	rs41401	72272811	7.18e-14	3.46e-05	0.00821	7.02e-08	0.00882
EMX1	2	1	rs999494	73010903	0.00751	0.00751	0.00169	0.219	0.0013
SFXN5	2	7	rs13400948	73143395	0.000884	0.00554	0.00228	0.0436	0.00222
RAB11FIP5	2	3	rs6736153	73174856	0.0042	0.0182	0.00185	0.0546	0.0021
NOTO	2	1	rs11902788	73287866	0.000245	0.000245	0.00262	0.0374	0.00231
SMYD5	2	1	rs7605115	73300327	5.29e-10	5.29e-10	0.00598	1.24e-06	0.00745
CCT7	2	1	rs12465780	73325520	0.492	0.492	0.00041	0.674	0.00053
ALMS1	2	15	rs17434013	73512964	0.000126	0.555	0.00282	0.0016	0.00397
STAMBP	2	1	rs13384232	73941218	0.0118	0.0118	0.00158	0.0914	0.00183
ACTG2	2	4	rs6711230	73996236	1.67e-19	0.027	0.01144	9.6e-14	0.01517
LOC100128039	2	2	rs10496194	74069485	0.0859	0.105	0.00099	0.0636	0.00202
MGC22014	2	8	rs828868	74178012	1.34e-05	0.00551	0.00338	0.000908	0.00423
BOLA3	2	5	rs7572066	74219540	0.000335	0.0012	0.00255	0.0284	0.00247
MTHFD2	2	1	rs17009735	74283048	0.0798	0.0798	0.00102	0.0338	0.00237
SLC4A5	2	11	rs3771725	74339404	1.74e-07	0.00293	0.0045	0.000782	0.0043
DCTN1	2	1	rs909177	74448522	0.00334	0.00334	0.00191	0.0133	0.00286
LOC388963	2	2	rs10187076	74493145	0.0246	0.0431	0.00136	0.0376	0.0023
RTKN	2	1	rs2268420	74508369	0.00088	0.00088	0.00228	0.0165	0.00274
GCS1	2	1	rs1063588	74543886	0.000708	0.000708	0.00233	0.0676	0.00198
DQX1	2	1	rs6546909	74599830	0.0247	0.0247	0.00136	0.169	0.00146
LOXL3	2	1	rs7569357	74632152	0.000195	0.000195	0.00268	0.00526	0.00334
C2orf65	2	8	rs6546912	74656236	6.37e-07	8.49e-05	0.00426	0.251	0.00124
SEMA4F	2	2	rs363611	74759708	8.72e-06	0.00139	0.00351	0.0887	0.00184
HK2	2	15	rs923273	74968238	1.02e-05	0.0463	0.00345	0.000394	0.00464
POLE4	2	1	rs17010582	75043057	0.00114	0.00114	0.00222	0.00415	0.00348
TACR1	2	25	rs2422094	75136586	2.04e-13	0.0011	0.00799	0.0426	0.00225
TMEM166	2	15	rs10489977	75621606	7e-10	0.0133	0.0059	0.0353	0.00234
MRPL19	2	3	rs1049678	75736164	0.000603	0.0111	0.00238	0.00105	0.00416
C2orf3	2	6	rs3213670	75746345	3.09e-08	0.0115	0.00505	6.48e-07	0.00794
LRRTM4	2	1	rs11677111	77601177	0.000498	0.000498	0.00244	0.35	0.00101
REG3G	2	1	rs369221	79106458	0.00462	0.00462	0.00183	0.147	0.00154
REG1B	2	1	rs3739144	79165922	3.97e-14	3.97e-14	0.00836	7.76e-08	0.00877
REG1A	2	1	rs283892	79203764	0.00166	0.00166	0.0021	0.0533	0.00211
LOC100130282	2	8	rs2272109	79239566	5.99e-08	0.0264	0.0048	0.00594	0.00329
REG3A	2	1	rs2272109	79239566	5.99e-08	5.99e-08	0.0048	0.00594	0.00329
LOC100132577	2	8	rs13390216	79395039	2e-05	0.0061	0.00328	0.000127	0.0052
CTNNA2	2	211	rs17261195	79988423	9.58e-20	0.00273	0.01158	2.47e-12	0.01365
SUCLG1	2	5	rs1159790	84539400	0.00764	0.258	0.00169	0.043	0.00223
FLJ37357	2	2	rs12373700	84633003	0.000193	0.0166	0.00268	0.000921	0.00422
LOC129293	2	6	rs1000919	84949992	0.385	0.415	0.00051	0.666	0.00054
KCMF1	2	4	rs17025827	85128177	6.63e-05	0.0137	0.00296	0.0496	0.00215
TCF7L1	2	29	rs6719271	85368228	8.89e-19	0.000918	0.01122	2.23e-10	0.01156
TGOLN2	2	2	rs1061782	85400126	2.69e-09	0.000136	0.00563	3.02e-05	0.00597
RBED1	2	4	rs6731223	85458815	7.99e-11	4.95e-07	0.00647	5.63e-05	0.00561
MAT2A	2	2	rs2043675	85623486	0.00105	0.0284	0.00223	0.297	0.00111
VAMP5	2	3	rs1254900	85669845	3.85e-17	2.61e-07	0.01009	3.95e-09	0.01018
RNF181	2	1	rs2232750	85677979	1.22e-07	1.22e-07	0.00459	0.0218	0.0026
USP39	2	3	rs17508809	85723281	6.38e-09	1.32e-08	0.00538	4.2e-05	0.00576
SFTPB	2	1	rs2118177	85743804	0.00887	0.00887	0.00164	0.312	0.00108
GNLY	2	1	rs1437743	85778500	2.95e-05	2.95e-05	0.00318	0.000331	0.00474
ATOH8	2	6	rs6746541	85855139	1.41e-20	0.0127	0.01206	2.48e-13	0.01473
ST3GAL5	2	9	rs1518990	85932852	0.00532	0.0692	0.00179	0.138	0.00157
POLR1A	2	10	rs17584578	86161135	4.95e-11	0.00018	0.00657	1.35e-06	0.00741
PTCD3	2	7	rs2303339	86199691	1.39e-10	0.299	0.00631	2.6e-06	0.0071
IMMT	2	14	rs17027011	86260067	2.87e-10	0.488	0.00614	4.03e-06	0.00689
MRPL35	2	3	rs1540391	86290025	0.322	0.734	0.00057	0.552	0.00069
REEP1	2	29	rs17510512	86338826	7.69e-08	0.00413	0.00473	0.0117	0.00294
JMJD1A	2	3	rs11127042	86551714	4.07e-05	5.95e-05	0.00309	0.025	0.00252
VPS24	2	4	rs4832294	86589872	1.22e-05	0.000478	0.00341	0.0186	0.00268
RNF103	2	4	rs41374146	86689315	0.000133	0.00807	0.00278	0.168	0.00146
RMND5A	2	1	rs4832311	86832406	2.67e-14	2.67e-14	0.00846	9.42e-07	0.00758
CD8B	2	4	rs4488661	86906663	6.86e-07	0.00156	0.00415	0.0194	0.00266
KRCC1	2	1	rs4972168	88132004	0.000127	0.000127	0.00284	0.227	0.0013
SMYD1	2	6	rs2970896	88164251	1.03e-09	0.0682	0.0058	0.000882	0.00424
FABP1	2	3	rs2241883	88205181	0.00118	0.0249	0.0022	0.0983	0.00177
THNSL2	2	2	rs11683461	88252911	5.72e-12	3.5e-11	0.00712	7.81e-07	0.00767
LOC344167	2	4	rs6722564	88520407	0.000487	0.0401	0.00243	0.00563	0.0033
C2orf51	2	1	rs11890178	88606597	1.48e-05	1.48e-05	0.00337	0.0273	0.00248
EIF2AK3	2	2	rs1913671	88680998	4.69e-09	6.74e-09	0.00542	0.00365	0.00352
RPIA	2	7	rs1158603	88780591	0.000744	0.261	0.00233	0.0256	0.00252
LOC730272	2	1	rs7572313	88861509	4.71e-06	4.71e-06	0.00365	0.00728	0.00317
IGK@	2	5	rs2449367	89900203	2.96e-05	0.0186	0.00318	0.146	0.00155
MAL	2	1	rs7560571	95056501	0.0122	0.0122	0.00156	0.549	0.00069
KCNIP3	2	6	rs3772031	95378618	3.13e-05	6.71e-05	0.00323	0.0426	0.00228
CIAO1	2	1	rs1044594	96301023	1.25e-09	1.25e-09	0.00575	2.15e-06	0.00718
ASCC3L1	2	2	rs772178	96327411	3e-12	2.79e-09	0.00728	6.08e-07	0.00779
NCAPH	2	2	rs3731935	96383776	6.19e-11	2.34e-09	0.00655	7.68e-06	0.0066
ARID5A	2	1	rs6576973	96582094	0.00029	0.00029	0.00257	0.00594	0.00327
CNNM4	2	1	rs2678381	96804993	1.58e-06	1.58e-06	0.00393	0.0403	0.00226
CNNM3	2	2	rs9948	96864527	3.71e-10	3.94e-10	0.00606	0.000111	0.00527
LOC51252	2	3	rs17119643	96917027	3.02e-09	0.00255	0.00554	0.000246	0.00488
FAHD2B	2	2	rs1257084	97121236	0.00227	0.00321	0.00202	0.0562	0.00209
ACTR1B	2	1	rs1042705	97640959	0.00086	0.00086	0.00234	0.0765	0.00195
LOC728537	2	2	rs2290127	97685467	5.93e-09	0.0004	0.0054	0.000584	0.00448
ZAP70	2	1	rs7425883	97697953	1.57e-10	1.57e-10	0.00628	5.74e-05	0.00559
TMEM131	2	17	rs6721323	97753610	3.11e-21	1.23e-09	0.01244	5.11e-09	0.01008
VWA3B	2	27	rs13431656	98195239	4.27e-11	0.0024	0.00661	0.000198	0.00498
LOC728861	2	1	rs7571110	98315915	0.132	0.132	0.00086	0.428	0.00087
CNGA3	2	7	rs10865015	98355642	2.52e-07	0.000245	0.0044	0.0235	0.00255
INPP4A	2	7	rs3769714	98517234	1.17e-10	3.01e-05	0.00636	2.86e-06	0.00705
C2orf64	2	2	rs4851145	98589348	6.16e-05	8.04e-05	0.00298	0.00446	0.00342
MGAT4A	2	8	rs17448420	98664315	4.67e-05	0.000496	0.00306	6.39e-05	0.00554
C2orf55	2	6	rs7607186	98890247	4.71e-06	0.00639	0.00365	0.145	0.00155
TSGA10	2	10	rs4850895	99010904	0.000354	0.139	0.00252	0.0159	0.00276
LIPT1	2	1	rs2632277	99145417	0.15	0.15	0.00084	0.0395	0.00233
MITD1	2	1	rs8179690	99161732	0.114	0.114	0.0009	0.0553	0.00209
MRPL30	2	1	rs11689265	99165699	0.0285	0.0285	0.00132	0.0317	0.0024
LYG1	2	1	rs1922625	99280430	1.37e-05	1.37e-05	0.00338	0.0165	0.00274
EIF5B	2	3	rs3828162	99342996	1.01e-06	0.00138	0.00407	0.00344	0.00357
REV1	2	10	rs3792151	99408079	5.89e-05	0.0167	0.003	0.00924	0.00305
AFF3	2	74	rs17022852	99635748	6.01e-10	0.00244	0.00594	0.000685	0.00437
LOC648405	2	8	rs6745099	100105873	6.34e-09	0.0171	0.00535	0.00401	0.00348
LOC150577	2	7	rs17023791	100216360	2.93e-07	0.00108	0.00437	3.85e-05	0.00579
LONRF2	2	11	rs6727379	100261703	2.55e-09	0.00151	0.00558	2.56e-06	0.0071
CHST10	2	5	rs4149513	100389158	0.000109	0.0185	0.00283	0.0105	0.00298
NMS	2	9	rs13411940	100453398	0.0246	0.334	0.00136	0.0132	0.00286
PDCL3	2	1	rs13422218	100551621	0.00472	0.00472	0.00183	0.16	0.00149
NPAS2	2	32	rs7587470	100819164	2.55e-27	0.000335	0.01588	6.56e-15	0.01641
TBC1D8	2	17	rs1302	100995430	9.4e-12	2.38e-05	0.00699	0.000116	0.00525
RPL31	2	6	rs1302	100995430	9.4e-12	3.23e-06	0.00699	0.000116	0.00525
RNF149	2	5	rs12612035	101263727	1.98e-11	0.000911	0.00693	1.55e-05	0.00635
CREG2	2	7	rs6735216	101337417	8.96e-06	0.00239	0.00349	0.00258	0.0037
MAP4K4	2	12	rs17809691	101687072	4.62e-12	0.0816	0.00724	2.12e-06	0.00726
IL1R2	2	9	rs4851524	101981034	1.19e-05	0.13	0.00341	0.0686	0.00197
IL1R1	2	6	rs3917325	102160339	1.79e-05	0.00263	0.00331	0.223	0.00129
LOC100129378	2	2	rs3917325	102160339	1.79e-05	0.247	0.00331	0.223	0.00129
IL1RL2	2	13	rs13014084	102221197	9.47e-08	3.8e-07	0.00466	0.0365	0.00232
IL1RL1	2	8	rs1041973	102321900	6.39e-14	0.057	0.0083	2.77e-07	0.00823
IL18R1	2	13	rs11465597	102353645	5.76e-13	0.137	0.00769	3.04e-09	0.01031
IL18RAP	2	8	rs11465732	102434255	7.51e-12	0.00581	0.00704	1.16e-05	0.00637
SLC9A4	2	27	rs17027293	102465272	1.65e-10	9.9e-08	0.00627	1.16e-10	0.01184
SLC9A2	2	15	rs4851622	102626877	1.26e-07	0.00013	0.00459	1.24e-05	0.00634
MFSD9	2	3	rs17027825	102708870	4.96e-18	3.35e-05	0.01064	1.53e-07	0.00849
TMEM182	2	12	rs17027985	102785627	3.82e-19	0.000434	0.01125	7.05e-08	0.00883
LOC728838	2	7	rs11123977	104058516	1.56e-20	0.447	0.01203	3.67e-15	0.01668
LOC284998	2	6	rs34080071	104734751	8.06e-07	4e-06	0.00411	1.74e-05	0.00617
LOC100128684	2	6	rs2376275	105015249	0.000108	0.00986	0.00284	0.305	0.00109
MRPS9	2	3	rs4511739	105060356	2.17e-07	6.37e-06	0.00445	0.012	0.00291
TGFBRAP1	2	9	rs920217	105271094	1.77e-05	0.00524	0.00331	3.96e-07	0.00799
FHL2	2	15	rs10194273	105409334	2.66e-10	0.00127	0.00615	1.27e-07	0.00854
LOC728966	2	3	rs6543296	105437433	2.69e-05	4e-05	0.0032	0.0232	0.00256
LOC100128547	2	13	rs3769501	105846238	1.42e-16	2.02e-05	0.00977	1.83e-06	0.00727
NCK2	2	39	rs3769501	105846238	1.42e-16	4.16e-05	0.00977	1.83e-06	0.00727
LOC100132455	2	1	rs2553071	105944700	0.0522	0.0522	0.00114	0.0174	0.00272
C2orf40	2	1	rs6732606	106060280	0.000286	0.000286	0.00258	0.0049	0.00337
UXS1	2	14	rs894392	106156092	3.02e-12	0.0131	0.00729	0.000454	0.00459
LOC100129665	2	4	rs9308902	106786841	1.1e-05	0.00234	0.00343	0.00247	0.00372
ST6GAL2	2	17	rs6543451	106840738	2.03e-10	0.002	0.00622	0.000265	0.00484
SLC5A7	2	8	rs3731684	107984946	1.02e-08	0.00333	0.00523	2.67e-06	0.0071
SULT1C3	2	1	rs12472278	108239865	3.39e-07	3.39e-07	0.00433	2.95e-05	0.00592
SULT1C2	2	1	rs17821116	108272380	1.31e-05	1.31e-05	0.00339	0.00413	0.00346
LOC151234	2	8	rs13382967	108311947	0.000115	0.018	0.00284	0.203	0.00135
GCC2	2	1	rs2577594	108471626	0.0114	0.0114	0.00158	0.27	0.00117
LIMS1	2	6	rs826686	108605839	0.0362	0.868	0.00125	0.198	0.00136
RANBP2	2	1	rs700876	108755278	0.118	0.118	0.00089	0.687	0.00051
CCDC138	2	2	rs9646942	108852701	0.299	0.539	0.00059	0.0537	0.00211
EDAR	2	9	rs260675	108966551	1.17e-11	0.000287	0.00694	0.000195	0.005
SH3MD4	2	66	rs10176655	109324113	4.67e-14	0.00154	0.00837	8.4e-08	0.00878
MALL	2	2	rs17842650	110230140	0.00128	0.799	0.00225	0.00457	0.00354
NPHP1	2	3	rs3789736	110243337	1.67e-05	0.000278	0.00332	3.82e-05	0.00579
BUB1	2	2	rs11900983	111142809	0.00689	0.00827	0.00172	0.365	0.00098
ACOXL	2	56	rs12993549	111460906	2.68e-16	0.0617	0.00961	4.69e-05	0.00569
BCL2L11	2	2	rs724710	111624162	2.05e-05	0.000615	0.00327	8.26e-06	0.00654
LOC729312	2	5	rs622274	111671956	5.77e-16	9.29e-10	0.00941	6.14e-11	0.01215
ANAPC1	2	1	rs4848209	112343109	0.000539	0.000539	0.00241	6.5e-05	0.00553
MERTK	2	23	rs11884641	112483877	1.57e-13	9.2e-05	0.00802	2.73e-06	0.00707
TMEM87B	2	6	rs6713344	112530516	1.26e-10	3.02e-05	0.00634	8.47e-07	0.00763
FBLN7	2	3	rs10189625	112641378	4.36e-14	1.37e-08	0.00833	2.28e-07	0.00826
ZC3H8	2	3	rs2872046	112695361	2.13e-08	1.41e-06	0.00516	2.93e-05	0.00612
ZC3H6	2	2	rs11903741	112787360	0.00317	0.0058	0.00193	0.00464	0.0034
TTL	2	3	rs6726169	112962482	0.000236	0.00224	0.00263	0.209	0.00133
POLR1B	2	4	rs6707131	113035380	0.00393	0.314	0.00187	0.0327	0.00238
CHCHD5	2	1	rs3748026	113058522	2.92e-12	2.92e-12	0.00729	6.21e-06	0.00668
SLC20A1	2	1	rs4848286	113136672	1.28e-05	1.28e-05	0.00339	2.57e-05	0.00599
NT5DC4	2	5	rs17042273	113192555	0.0011	0.00518	0.00222	0.0135	0.00285
CKAP2L	2	2	rs6542088	113220301	1.11e-06	0.757	0.00403	0.00421	0.00345
IL1A	2	2	rs3783550	113249356	0.000782	0.000801	0.00231	0.0505	0.00214
IL1F7	2	6	rs2464913	113387607	0.404	0.571	0.00049	0.568	0.00066
IL1F9	2	2	rs13410389	113454494	0.00044	0.193	0.00247	0.059	0.00206
IL1F8	2	11	rs11883847	113508642	1.44e-07	0.000161	0.00456	0.00388	0.0035
IL1F5	2	7	rs1530550	113533984	1e-05	4.24e-05	0.00346	0.0675	0.00198
IL1F10	2	3	rs4849148	113545993	9.01e-16	0.147	0.00931	3.55e-06	0.00695
IL1RN	2	12	rs452204	113605532	0.000248	0.00572	0.00261	0.0543	0.0021
PSD4	2	5	rs4849166	113656234	6.25e-08	3.23e-05	0.00478	0.000555	0.00448
LOC654433	2	3	rs4848320	113727261	7.83e-09	0.000961	0.00529	0.000444	0.00459
PAX8	2	9	rs17043176	113741842	8.49e-13	0.000632	0.00759	1.29e-06	0.00743
SLC35F5	2	12	rs11677881	114234334	4.48e-11	1.16e-05	0.0066	2.67e-07	0.0082
ACTR3	2	7	rs11890727	114383964	1.92e-07	1.27e-06	0.00453	0.000195	0.00503
LOC440900	2	9	rs156713	114472786	4.6e-08	0.000129	0.00484	0.0176	0.00271
LOC389023	2	2	rs6542249	115633116	1.23e-07	0.0406	0.00471	2.94e-06	0.00722
DPP10	2	146	rs843418	115932831	9.25e-14	0.00294	0.00815	8.06e-08	0.00876
DDX18	2	3	rs4849627	118294452	0.104	0.264	0.00093	0.202	0.00135
CCDC93	2	20	rs17047519	118390562	1.88e-06	0.000988	0.00389	0.0809	0.00188
INSIG2	2	2	rs9308762	118580344	0.252	0.848	0.00065	0.133	0.0016
LOC645733	2	1	rs3912498	118657679	0.00146	0.00146	0.00219	0.00652	0.0033
MARCO	2	7	rs7559955	119441439	8.02e-09	7.57e-05	0.00529	0.00852	0.00309
STEAP3	2	11	rs7596511	119727369	6.17e-13	0.000731	0.00783	0.0018	0.00394
LOC130355	2	7	rs11123515	119784642	4.99e-10	0.00766	0.00599	0.0068	0.0032
TMEM37	2	2	rs17015803	119907901	0.102	0.108	0.00094	0.914	0.00022
SCTR	2	14	rs10200558	119981291	2.56e-09	0.192	0.00576	0.00028	0.00491
MGC33657	2	8	rs12373810	120073559	1.33e-06	0.296	0.00398	0.00835	0.0031
LOC645955	2	1	rs745926	120198527	9.92e-05	9.92e-05	0.00286	0.0162	0.00275
PTPN4	2	8	rs4480992	120425787	0.000187	0.00608	0.00269	0.118	0.00166
EPB41L5	2	12	rs17669093	120493458	5.84e-05	0.0338	0.00305	0.00729	0.0032
LOC729669	2	2	rs6706062	120650568	0.0152	0.0234	0.00149	0.33	0.00104
RALB	2	5	rs3931841	120757784	4.81e-07	3.88e-05	0.00424	2.43e-05	0.00601
GLI2	2	33	rs6541742	121315169	2.12e-15	0.000627	0.00912	1.62e-11	0.0128
TFCP2L1	2	5	rs2250092	121709391	3.44e-10	4.16e-06	0.00608	6.39e-08	0.00886
CLASP1	2	16	rs11122854	121860503	1.77e-11	0.234	0.00686	0.00229	0.00377
MKI67IP	2	3	rs17006779	122206301	0.0197	0.0603	0.00142	0.0426	0.00224
LOC646179	2	1	rs11693188	122269580	0.0617	0.0617	0.00109	0.744	0.00044
CNTNAP5	2	146	rs4848941	125059107	6.02e-27	0.00125	0.01568	1.53e-15	0.01711
GYPC	2	11	rs11694376	127141319	2.96e-08	0.00041	0.00495	0.000167	0.00507
LOC100130248	2	1	rs17014139	127154066	0.000402	0.000402	0.00249	0.0029	0.00364
LOC339760	2	4	rs11690380	127365579	3.55e-16	4.13e-08	0.00954	4.93e-09	0.01008
BIN1	2	7	rs1060743	127543003	7.52e-06	0.00128	0.00353	0.014	0.00283
CYP27C1	2	4	rs4284778	127662796	0.000307	0.0741	0.00256	0.00622	0.00325
ERCC3	2	8	rs4150512	127735925	5.02e-06	0.0395	0.00364	0.131	0.00161
MAP3K2	2	2	rs6731176	127787473	0.0012	0.0125	0.00219	0.00804	0.00312
IWS1	2	10	rs1864553	127999821	4.95e-11	1.99e-05	0.00658	5.14e-05	0.00565
MYO7B	2	5	rs777437	128074117	1.46e-08	0.000114	0.00516	0.000745	0.00435
LIMS2	2	1	rs2244042	128121468	6.8e-05	6.8e-05	0.00296	0.00351	0.00354
GPR17	2	1	rs2244042	128121468	6.8e-05	6.8e-05	0.00296	0.00351	0.00354
WDR33	2	9	rs7595381	128192954	3.71e-12	5.34e-08	0.00723	1.08e-05	0.00641
AMMECR1L	2	2	rs2405635	128353695	0.017	0.705	0.00147	0.277	0.00116
SAP130	2	14	rs17262104	128464019	9.34e-10	0.00289	0.00596	1.39e-06	0.00758
UGCGL1	2	7	rs17178396	128645018	9.51e-06	9.4e-05	0.00347	0.00724	0.00317
HS6ST1	2	8	rs840879	128788244	2.02e-17	0.000819	0.01047	6.02e-06	0.0068
LOC100131288	2	11	rs837839	129750557	1.79e-06	8.83e-05	0.0039	0.000608	0.00443
LOC389033	2	1	rs10928942	130399814	0.000638	0.000638	0.00236	0.235	0.00126
LOC100131320	2	1	rs6719989	130453773	0.53	0.53	0.00039	0.833	0.00034
RAB6C	2	1	rs6719989	130453773	0.53	0.53	0.00039	0.833	0.00034
LOC730032	2	7	rs4569490	131377233	1.68e-09	8.9e-06	0.00568	0.00598	0.00327
ARHGEF4	2	10	rs7606538	131501241	1.33e-19	2.26e-06	0.0115	2.85e-08	0.00925
LOC130074	2	3	rs2313160	131553712	1.19e-11	0.224	0.00693	0.000325	0.00474
PLEKHB2	2	1	rs10928539	131605649	0.189	0.189	0.00075	0.399	0.00093
LOC389043	2	2	rs6430791	131882678	3.84e-07	4.54e-07	0.0043	0.000197	0.00499
TUBA3D	2	1	rs16856655	131955270	0.0494	0.0494	0.00116	0.0391	0.00228
FAM128A	2	1	rs6724844	131958922	0.0426	0.0426	0.0012	0.0701	0.00196
FLJ41352	2	5	rs12617520	131981559	7.72e-05	0.00328	0.00294	0.177	0.00144
C2orf27	2	2	rs4091445	132197051	5.59e-08	0.00631	0.00486	0.000205	0.00507
ZNF806	2	2	rs4425129	132789457	0.000315	0.0209	0.00255	0.00141	0.00401
GPR39	2	51	rs7605278	132932784	1.02e-15	0.000182	0.00928	3.21e-07	0.00811
LYPD1	2	4	rs3738842	133122276	0.00361	0.0219	0.00189	0.00101	0.00417
NAP5	2	159	rs17738653	133708752	6.52e-19	0.00509	0.01135	4.2e-09	0.01028
MGAT5	2	43	rs629794	134922205	7.21e-52	1.17e-12	0.02978	4.68e-29	0.03147
TMEM163	2	31	rs515983	135002148	2.8e-45	3.25e-08	0.02712	3.87e-25	0.02843
ACMSD	2	1	rs10928521	135336655	5.56e-37	5.56e-37	0.02136	4.71e-22	0.02403
CCNT2	2	1	rs6743206	135410007	1.37e-63	1.37e-63	0.04053	8.6e-39	0.04642
[truncated: 12,045 more rows]
